# Supplementary material for: In Vivo Assembly of Artificial Metalloenzymes and Application in Whole‐Cell Biocatalysis
Source: PubMed Central journal article supplement — Angew Chem Int Ed Engl. 2021 Feb 1;60(11):5913–20. doi: 10.1002/anie.202014771 (PMC7986609; doi:10.1002/anie.202014771), 2021-02-01
Supplement: ANIE-60-5913-s001.pdf [file ANIE-60-5913-s001.pdf]

## Supporting Information

### **In Vivo Assembly of Artificial Metalloenzymes and Application in Whole-Cell Biocatalysis\*\***

*Shreyans Chordia, Siddarth Narasimhan, Alessandra Lucini Paioni, Marc Baldus, and Gerard Roelfes\**

anie\_202014771\_sm\_miscellaneous\_information.pdf

## ***Supporting Information***

### ***Table of contents***

|     |                                                                |      |
|-----|----------------------------------------------------------------|------|
| 1.  | Supplementary tables                                           | S2   |
| 2.  | General remarks                                                | S6   |
| 3.  | Chemical synthesis                                             | S7   |
| 4.  | Molecular biology                                              | S8   |
| 5.  | Catalysis                                                      | S12  |
| 6.  | ICP-OES quantification of cellular copper content              | S16  |
| 7.  | Inhibitor studies                                              | S17  |
| 8.  | Cell fractionation                                             | S28  |
| 9.  | NMR studies                                                    | S29  |
| 10. | Directed evolution                                             | S55  |
| 11. | Kinetic studies                                                | S61  |
| 12. | SDS-PAGE gels of the LmrR mutants after Strep-Tag purification | S62  |
| 13. | Mass spectra                                                   | S66  |
| 14. | HPLC analysis and chromatograms                                | S76  |
| 15. | References                                                     | S125 |

## 1. Supplementary tables

**Table S1: Effect of mutations in LmrR on *in vivo* and *in vitro* catalysis of the Friedel-Crafts reaction between **1** and **2b****

| <b>Cu(II)-Phen</b> ⊂ <b>LmrR</b> | <i>in vivo</i> catalysis <sup>a</sup> | <i>in vitro</i> catalysis <sup>b</sup> |               |
|----------------------------------|---------------------------------------|----------------------------------------|---------------|
| <b>Protein variant</b>           | <b>ee (%)</b>                         | <b>yield (%)</b>                       | <b>ee (%)</b> |
| LmrR                             | 34±5                                  | 51±11                                  | 91±0          |
| LmrR_M8A                         | 41±1                                  | 85±7                                   | 93±0          |
| LmrR_L18A                        | 20±8                                  | 39±0                                   | 90±0          |
| LmrR_N88A                        | 26±1                                  | 14±1                                   | 82±0          |
| LmrR_M89A                        | 14±2                                  | 14±0                                   | 67±0          |
| LmrR_A92E                        | 63±1                                  | Full conversion                        | 94±0          |
| LmrR_F93A                        | 3±1                                   | 3±0                                    | 30±1          |
| LmrR_W96A                        | 2±1                                   | 8±1                                    | 18±4          |
| LmrR_D100A                       | 5±2                                   | 18±2                                   | 72±0          |

<sup>a</sup> F-C Alkylation of **1** (1 mM) and **2b** (1 mM), cell suspension 500 μL, Cu(II)-Phen 90 μM, reaction time 16 h at 4 °C.

<sup>b</sup> F-C Alkylation of **1** (1 mM) and **2b** (1 mM), purified protein 120 μM, Cu(II)-Phen 90 μM, reaction time 24 h at 4 °C.

**Table S2: *in vivo* catalysis results from Alanine scanning of LmrR for the Friedel-Crafts reaction between **1** and **2b**.**

| LmrR<sup>C</sup> Cu(II)-Phen | <i>in vivo</i> catalysis |        |
|------------------------------|--------------------------|--------|
|                              | yield (%)                | ee (%) |
| LmrR                         | 6±4                      | 34±5   |
| LmrR_E7A                     | 6±2                      | 27±2   |
| LmrR_M8A                     | 8±0                      | 41±1   |
| LmrR_R10A                    | 2±0                      | 32±8   |
| LmrR_Q12A                    | 6±0                      | 21±1   |
| LmrR_N14A                    | 5±1                      | 35±10  |
| LmrR_V15A                    | 6±1                      | 25±7   |
| LmrR_L18A                    | 7±5                      | 20±8   |
| LmrR_N88A                    | 2±1                      | 26±1   |
| LmrR_M89A                    | 2±0                      | 14±2   |
| LmrR_A92E                    | 17±5                     | 63±1   |
| LmrR_F93A                    | 4±1                      | 3±1    |
| LmrR_S95A                    | 2±0                      | 37±10  |
| LmrR_W96A                    | 5±1                      | 2±1    |
| LmrR_S97A                    | 2±0                      | 22±8   |
| LmrR_V99A                    | 4±2                      | 13±7   |
| LmrR_D100A                   | 5±3                      | 5±2    |

Conditions: **1** (1 mM) and **2b** (1 mM), cell suspension 500 μL, Cu(II)-Phen 90 μM, reaction time 16 h at 4 °C.

**Table S3: Influence of Glutathione on in vitro Cu(II)-ArM catalysis of the reaction of 1 with 2a.<sup>a</sup>**

| catalyst                   | Glutathione (mM) | yield (%) | ee (%) |
|----------------------------|------------------|-----------|--------|
| LmrR_A92E_M8D <sup>b</sup> | 0                | 37±10     | 98±0   |
| Cu(II)-Phen <sup>b</sup>   | 0                | 3±0       | 0      |
| LmrR_A92E_M8D <sup>c</sup> | 1                | 40±21     | 97±1   |
| Cu(II)-Phen <sup>c</sup>   | 1                | 1±0       | 0      |
| LmrR_A92E_M8D <sup>d</sup> | 10               | 7±2       | 93±1   |
| Cu(II)-Phen <sup>d</sup>   | 10               | 13±1      | <5     |

<sup>a</sup> 1 (1 mM), 2a (1 mM). <sup>b</sup> Catalyst loading 0.9%, reaction time 30 min at 4 °C. <sup>c</sup> Catalyst loading 9%, reaction time 30 min at 4 °C. <sup>d</sup> Catalyst loading 9%, reaction time 48h at 4 °C.

**Diels Alder reaction:****Table S4: *in vivo* catalysis results from Alanine scanning of LmrR for the Diels-Alder reaction between 4 and 5 to give the Diels-Alder product 6.**

| LmrRC Cu(II)-Phen            | <i>in vivo</i> catalysis |                       | <i>In vitro</i> catalysis |                       |
|------------------------------|--------------------------|-----------------------|---------------------------|-----------------------|
|                              | yield (%) <sup>a</sup>   | ee (%) <sup>a,b</sup> | yield (%) <sup>a</sup>    | ee (%) <sup>a,b</sup> |
| LmrR                         | 24                       | -17                   | 22                        | -58                   |
| LmrR_A92E                    | 24                       | -31                   | 33                        | -68                   |
| LmrR_A92E_M8A                | 20                       | -16                   | 11                        | -36                   |
| LmrR_R10A                    | 21                       | -11                   | 11                        | -59                   |
| LmrR_A92E_N14A               | 23                       | -22                   | 8                         | -51                   |
| LmrR_A92E_V15A               | 42                       | -65                   | 52                        | -84                   |
| LmrR_L18A                    | 12                       | <5                    | 7                         | -36                   |
| LmrR_N88A                    | 18                       | -5                    | 8                         | -40                   |
| LmrR_A92E_M89A               | 18                       | -11                   | 7                         | -41                   |
| LmrR_A92E_F93A               | 16                       | 6                     | 5                         | -11                   |
| LmrR_W96A                    | 17                       | <5                    | 7                         | <5                    |
| LmrR_S97A                    | 15                       | -12 <sup>c</sup>      | 5 <sup>c</sup>            | -21                   |
| LmrR_V99A                    | 24                       | -15                   | 12                        | -60                   |
| LmrR_A92E_D100A <sup>c</sup> | 20                       | 5                     | 4                         | -22                   |

Conditions *in vivo* catalysis *E. coli* C43(DE3) cell suspension overexpressing LmrR\_X 2 mL (OD<sub>600nm</sub> = 4), Cu(II)-Phen 360 μM, 4 (1 mM) and 5 (33 mM), reaction time 72 h at 4 °C; conditions *in vitro* catalysis: Cu(II)-Phen 90 μM, LmrR\_X 120 μM, 4 (1 mM) and 5 (33 mM), reaction time 48 h at 4 °C. Results are the average of duplicate experiments. a) of the endo isomer of 6. b) + or – signs indicate which is the major enantiomer peak based on order of elution from the hplc, first and second, respectively. c) data from single experiments.

**Table S5: *in vivo* catalysis of Diels-Alder by LmrR\_V15A\_A92E/Cu(II)-Phen and control experiments**

|                                                                                                                                   | yield % <sup>a</sup> | ee % <sup>a</sup> |
|-----------------------------------------------------------------------------------------------------------------------------------|----------------------|-------------------|
| Whole cell_cytoplasmic SUMO/Cu(II)-Phen                                                                                           | 14±1                 | 0                 |
| Whole cell_cytoplasmic Cu(II)-Phen⊕LmrR                                                                                           | 12±4                 | -8±1              |
| Whole cell_cytoplasmic Cu(II)-Phen⊖LmrR_A92E                                                                                      | 15±6                 | -17±1             |
| Whole cell_cytoplasmic Cu(II)-Phen⊖LmrR_V15A_A92E                                                                                 | 20±3                 | -45±0             |
| Whole cell_cytoplasmic LmrR_V15A_A92E<br>No Cu(II)-Phen added                                                                     | 7±3                  | <-5 (-1±0)        |
| Supernatant after Cu(II)-Phen incubation_cytoplasmic<br>LmrR_V15A_A92E                                                            | 4±0                  | <-5 (-1±0)        |
| Whole cell_cytoplasmic Cu(II)-Phen⊕LmrR_V15A_A92E After 48<br>hours <i>in vivo</i> catalysis, Recycled cell fraction + substrates | 46±11                | -46±2             |
| Whole cell_cytoplasmic Cu(II)-Phen ⊖LmrR_V15A_A92E After<br>48 hours <i>in vivo</i> catalysis, Supernatant + substrates           | 19±1                 | <-5 (-4±1)        |

Conditions: Cu(II)-Phen (180 μM), *E. coli* cell suspension 1 mL, **4** (1 mM) and **5** (33 mM) in 20 mM MOPS, 150 mM NaCl at pH 7, reaction time 48 h at 4 °C. a. Of the endo isomer. Values represent the average of duplicate experiments, each performed *in duplo*. Errors are given as standard deviations. + or – signs indicate which is the major enantiomer peak based on order of elution from the hplc, first and second, respectively.

**Table S6: Results of catalysis of the Diels-Alder reaction of **4** with **5** by isolated LmrR/Cu(II)-phen and LmrR mutants.**

| <b>Catalyst:</b>                  | yield % <sup>a</sup> | ee % <sup>a,b</sup> |
|-----------------------------------|----------------------|---------------------|
| <b>Cu-Phen</b>                    | 17±2                 | -                   |
| <b>LmrR/Cu(II)-Phen</b>           | 22±5                 | -58±6               |
| <b>LmrR-A92E/Cu(II)-Phen</b>      | 33±10                | -68±2               |
| <b>LmrR-V15A/Cu(II)-Phen</b>      | 41±5                 | -78±1               |
| <b>LmrR-A92E-V15A/Cu(II)-Phen</b> | 52±7                 | -84±3               |
| <b>LmrR-A92E-M8D/Cu(II)-Phen</b>  | 25±2                 | -55±2               |

Conditions: Cu(II)-Phen (90 μM), LmrR variant (120 μM), **4** (1 mM) and **5** (33 mM) in 20 mM MOPS, 150 mM NaCl at pH 7, reaction time 48 h at 4 °C; a. Of the endo isomer. Values represent the average of duplicate experiments, each performed *in duplo*. Errors are given as standard deviations. b) + or – signs indicate which is the major enantiomer peak based on order of elution from the hplc, first and second, respectively.

## **2. General remarks**

Chemicals and reagents were purchased from Sigma Aldrich and used without further purification.  $^1\text{H}$ -NMR and  $^{13}\text{C}$ -NMR spectra were recorded on a Varian 400 MHz or a Bruker 600 MHz in  $\text{CDCl}_3$ . *E. coli* strains NEB5-alpha, NEB10-beta and C43(DE3) (New England Biolabs and Lucigen, USA) were used for cloning and expression of proteins. Primers were synthesized and DNA sequencing carried out by Eurofins Genomics (Germany). All the enzymes for cloning and mutagenesis were purchased from New England Biolabs (USA). Plasmid Purification Kits were obtained from QIAGEN (Germany). The DNA and protein concentrations in solutions were derived from the absorption at 260 nm or 280 nm on a Thermo Fisher Scientific Nanodrop 2000 UV-Vis spectrophotometer, respectively. Strep-tactin columns (Strep-Tactin<sup>®</sup> Superflow<sup>®</sup> high capacity) were purchased from IBA-Lifesciences (Germany). Mass spectra (HRMS) were recorded on an Orbitrap XL (Thermo Fisher Scientific; ESI pos. mode). Fluorescence experiments were recorded using a JASCO FP-6200 spectrometer and a TECAN Spark10M fluorimeter.

### 3. Chemical synthesis

#### **Copper complex:**

Cu(1,10-phenanthroline)(NO<sub>3</sub>)<sub>2</sub> (**Cu(II)-Phen**) was prepared by following the published procedure.<sup>1</sup>

Elemental analysis calcd. for C<sub>12</sub>H<sub>8</sub>CuN<sub>4</sub>O<sub>6</sub>: C, 39.19; H, 2.19; N, 15.23. Found C, 38.95; H, 2.13 ; N, 15.13.

#### **Substrate 1:**

(E)-1-(1-Methyl-1H-imidazole-2-yl)-but-2-en-1-one (**1**) was prepared following a literature procedure.<sup>2</sup>

#### **Friedel-Crafts Alkylation products:**

1-(1-methyl-1H-imidazol-2-yl)-3-(2-methyl-1H-indol-3-yl)butan-1-one (**3a**), 3-(5-methoxy-1H-indol-3-yl)-1-(1-methyl-1H-imidazol-2-yl)butan-1-one (**3b**), 3-(1H-indol-3-yl)-1-(1-methyl-1H-imidazol-2-yl)butan-1-one (**3c**) and 3-(5-chloro-1H-indol-3-yl)-1-(1-methyl-1H-imidazol-2-yl)butan-1-one (**3d**) were prepared following a literature procedure.<sup>2,3</sup> The NMR data match those reported in the literature.

#### **Dienophile Substrate 4:**

(E)-3-phenyl-1-(pyridin-2-yl)prop-2-en-1-one was prepared following a literature procedure.<sup>4,5</sup>

#### **Diels-Alder product 6:**

3-phenylbicyclo[2.2.1]hept-5-en-2-yl(pyridin-2-yl)methanone was prepared following a literature procedure. The NMR data match those reported in the literature.<sup>4,5</sup>



## **4. Molecular biology**

### ***Site-Directed mutagenesis of LmrR***

The template used for making the mutants was either pET17b\_LmrR or pET17b\_LmrR\_A92E, which contain mutations at 2 lysines (K55D and K59Q) that negate the natural DNA-binding ability of the protein and was codon optimized for expression in *E. coli*.<sup>6,7</sup> The Quikchange Site Directed Mutagenesis Protocol (Agilent Technologies) was employed, using oligos described in (Table S5). The protocol was as follows: (1) initial denaturation at 95 °C for 1 min, (2) 25 cycles of denaturation at 98 °C for 30 s, annealing at 52-60 °C for 30 s (depending on the T<sub>m</sub> of the primers) and extension at 72 °C for 4 min 30 s; (3) final extension at 72 °C for 10 min. The PCR product was digested with 1 μL DpnI for 2 h at 37 °C and chemically competent *E. coli* NEB5-alpha cells were transformed with 5 μL reaction mixture. A single colony picked from LB agar plates supplemented with 100 μg/μL ampicillin was transferred to LB media containing 100 μg/μL ampicillin. The overnight cell culture was used to make a glycerol stock, isolate the plasmid DNA and DNA sequencing confirmed the sequence of the mutant. The glycerol stock was used to make overnight starter cultures and subsequent day culture for protein expression and purification.

### ***Shake flask cultivation and LmrR expression***

Freshly transformed single colonies of *E. coli* C43(DE3) containing plasmid pET17b\_LmrR were picked and used to inoculate a starter culture of 5 mL of fresh LB medium containing 100 μg/mL ampicillin. The entire starter culture was used to inoculate 500 mL of fresh LB medium containing 100 μg/mL ampicillin in a 2 L flask. When the culture reached an OD<sub>600nm</sub> between 0.8–0.9, isopropyl β-D-1-thiogalactopyranoside (IPTG) at final concentration of 1 mM was added to induce the expression of LmrR. Overnight expression was carried out at 30 °C and the cells were used for *in vivo* catalysis, cell fractionation or protein purification.

### ***Protein purification***

An overnight induced *E. coli* C43(DE3) cell culture over-expressing LmrR variant was centrifuged (6000 rpm, JA10, 20 min, 4 °C, Beckman). The cell pellet was re-suspended in 15-20 mL of wash buffer (50 mM NaH<sub>2</sub>PO<sub>4</sub>, pH 8.0, 150 mM NaCl) along with half a tablet of mini complete EDTA-free protease inhibitor cocktail (Roche) and PMSF. Next, DnaseI (final concentration, 0.1 mg/mL) and MgCl<sub>2</sub> (final concentration, 10mM) were added. The cells were sonicated (sonication tip diameter 6 mm, 10 min, 10 s ON, 15 s OFF, Amplitude 75%). Additional sheer forcing with a syringe and a long needle was applied at least 2 times. Cell debris was centrifuged (16000 rpm, JA-17, 45 min, 4 °C, Beckman). The supernatant was filtered (cell-

free extract) and equilibrated with 5 mL of pre-equilibrated Strep-tag Tactin column material for 1 h (mixed at 200 rpm on a rotary shaker) at 4 °C. The column was washed with 3 x 2 CV (column volume) of wash buffer and eluted multiple times with 0.5 CV (6-7 times) of elution buffer (wash buffer containing 5 mM desthiobiotin). Fractions containing protein (excluding the first elution) were concentrated in centrifugal filters and re-buffered to 20 mM MOPS, pH 7.0, 150 mM NaCl by dialysis. The concentration of purified protein was determined by using the calculated extinction coefficient obtained from ProtParam on the ExPASy server (for example, LmrR monomer has  $\epsilon_{280} = 25440 \text{ M}^{-1} \text{ cm}^{-1}$ ). Expression yields typically were 30-40 mg of protein  $\text{L}^{-1}$  media.

### ***Analysis of purified protein***

The fractions of purified protein samples were compared against a protein ladder (PageRuler™ Unstained Broad Range) on a 12% polyacrylamide SDS-Tris Tricine gel followed by Coomassie Blue staining. The protein samples were also analyzed by LC-MS. They were separated/desalted on a Kinetex 2.6u EVO C18 column using a Shimadzu Prominence UFLC (Shimadzu) at a flow rate of 0.3 mL/min. First an isocratic flow with 10% eluent B (B = 100% AcN/0.1% formic acid) for 1.5 min was maintained. Then, a linear gradient of 4.5 min from 10–90% buffer A (A = H<sub>2</sub>O/0.1% formic acid) was applied. MS data were acquired from m/z 500 to 1500. Protein masses were determined by deconvolution.

**Table S7. List of Primers**

| <b>Primer name</b> | <b>DNA Sequence (5' -&gt; 3')</b> |
|--------------------|-----------------------------------|
| LmrR_M8<br>_F      | ATCCCGAAAGAAGCGCTGCGTGCTCAA       |
| LmrR_M8<br>A_R     | TTGAGCACGCAGCGCTTCTTTCGGGAT       |
| LmrR_N14<br>A_F    | CGTGCTCAAACCGCGGTCATCCTGCTG       |
| LmrR_N14<br>A_R    | CAGCAGGATGACCGCGGTTTGAGCACG       |
| LmrR_N88<br>A_F    | GGCCATGAAGCCATGCGCCTG             |
| LmrR_N88<br>A_R    | CAGGCGCATGGCTTCATGGCC             |
| LmrR_M8<br>9A_F    | CATGAAAACGCGCGCCTGGCG             |
| LmrR_M8<br>9A_R    | CGCCAGGCGCGCGTTTTTCATG            |

| <b>Primer name</b> | <b>DNA Sequence (5' -&gt; 3')</b>                                                              |
|--------------------|------------------------------------------------------------------------------------------------|
| LmrR_A92E_F        | AACATGCGCCTGGAATTCGAATCCTGG                                                                    |
| LmrR_A92E_R        | CCAGGATTCGAATTCAGGCGCATGTT                                                                     |
| LmrR_F93A_F        | CGCCTGGCGGCGGAATCCTGG                                                                          |
| LmrR_F93A_R        | CCAGGATTCGCCGCCAGGCG                                                                           |
| LmrR_W96A_F        | GCGTTCGAATCCGCGAGTCGTGTGGAC                                                                    |
| LmrR_W96A_R        | GTCCACACGACTCGCGGATTCGAACGC                                                                    |
| LmrR_D100A_F       | TGGAGTCGTGTGGCGAAAATCATTGAA                                                                    |
| LmrR_D100A_R       | TTCAATGATTTTCGCCACACGACTCCA                                                                    |
| LmrR_R10A_F        | AAAGAAATGCTGGCGGCTCAAACCAAT                                                                    |
| LmrR_R10A_R        | ATTGGTTTGAGCCGCCAGCATTTCTTT                                                                    |
| LmrR_S95A_F        | CTGGCGTTCGAAGCCTGGAGTCGTGTG                                                                    |
| LmrR_S95A_R        | CACACGACTCCAGGCTTCGAACGCCAG                                                                    |
| LmrR_A92H_F        | AACATGCGCCTGCATTTTGAATCCTGG                                                                    |
| LmrR_A92H_R        | CCAGGATTCGAATGCAGGCGCATGTT                                                                     |
| LmrR_L18A_F        | AATGTCATCCTGGCGAATGTCCTGAAA                                                                    |
| LmrR_L18A_R        | TTTCAGGACATTCGCCAGGATGACATT                                                                    |
| LmrR_A92D_F        | AACATGCGCCTGGATTTTGAATCCTGG                                                                    |
| LmrR_A92D_R        | CCAGGATTCGAATTCAGGCGCATGTT                                                                     |
| LmrR_V99A_F        | TCCTGGAGTCGTGCGGACAAAATCATT                                                                    |
| LmrR_V99A_R        | AATGATTTTGTCCGCACGACTCCAGGA                                                                    |
| LmrR_E7A_F         | GAAATCCCGAAAGCGATGCTGCGTGCT                                                                    |
| LmrR_E7A_R         | AGCACGCAGCATCGCTTTTCGGGATTTT                                                                   |
| LmrR_S97A_F        | TTCGAATCCTGGGCGCGTGTGGACAAA                                                                    |
| LmrR_S97A_R        | TTTGTCCACACGCGCCAGGATTCGAA                                                                     |
| LmrR_A92Q_F        | AACATGCGCCTGCAGTTCGAATCCTGG                                                                    |
| LmrR_A92Q_R        | CCAGGATTCGAAATGCAGGCGCATGTT                                                                    |
| LmrR_V15A_F        | GCTCAAACCAATGCGATCCTGCTGAAT                                                                    |
| LmrR_V15A_R        | ATTCAGCAGGATCGCATTGGTTTGAGC                                                                    |
| LmrR_Q12A_F        | CTGCGTGCTGCGACCAATGTCA                                                                         |
| LmrR_Q12A_R        | TGACATTGGTCGCAGCACGCAG                                                                         |
| SRP-LmrR_F         | GAGCATATGAAAAAGATTTGGCTGGCGCTGGCTGGTTTAGTTTTAGCGTTTAGCGCATCGGCGGGCGCA<br>GATGGGTGCCGAAATCCCGAA |
| SRP-LmrR_R         | CTCAAGCTTTTATTTTTCGAACTGCGGGTGGC                                                               |

**Table S8. List of Primers used for A92E\_X mutants**

| Primer name              | DNA Sequence (5' -> 3')           |
|--------------------------|-----------------------------------|
| LmrR_A92E_M8NDT_F        | ATCCCGAAAGAANDTCTGCGTGCTCAA       |
| LmrR_A92E_M8NDT_R        | TTGAGCACGCAGAHNTTCTTTCCGGGAT      |
| LmrR_A92E_N14NDT_F       | CGTGCTCAAACCNDTGTCATCCTGCTG       |
| LmrR_A92E_N14NDT_R       | CAGCAGGATGACAHNGGTTTGAGCACG       |
| LmrR_A92E_N88NDT_F       | ATCGGCCATGAANDTATGCGCCTGGAA       |
| LmrR_A92E_N88NDT_R       | TTCCAGGCGCATAHNTTCATGGCCGAT       |
| LmrR_A92E_M89NDT_F       | GGCCATGAAAACNDTCGCCTGGAATTC       |
| LmrR_A92E_M89NDT_R       | GAATTCCAGGCGAHNGTTTTTCATGGCC      |
| LmrR_A92E_F93NDT_F       | ATGCGCCTGGAANDTGAATCCTGGAGT       |
| LmrR_A92E_F93NDT_R       | ACTCCAGGATTCAHNTTCCAGGCGCAT       |
| LmrR_A92E_D100NDT_F      | TCCTGGAGTCGTGTGNDTAAAATCATTGCGAAT |
| LmrR_A92E_D100NDT_R      | ATTCGCAATGATTTTAHNCACACGACTCCAGGA |
| LmrR_A92E_M89A_F         | ATGCGCCTGGAAGCCGAATCCTGGAGT       |
| LmrR_A92E_M89A_R         | ACTCCAGGATTCCGCTTCCAGGCGCAT       |
| LmrR_A92E_F93A_F         | GGCCATGAAAACGCGCGCCTGGAATTC       |
| LmrR_A92E_F93A_R         | GAATTCCAGGCGCGGTTTTTCATGGCC       |
| LmrR-V15A-A92E-M8NDT_F   | CGAAAGAANDTCTGCGTGCTCAA           |
| LmrR-V15A-A92E-M8NDT_R   | GCACGCAGAHNTTCTTTCCGGGAT          |
| LmrR-V15A-A92E-N14NDT_F  | CTCAAACCNDTGCGATCCTGCTG           |
| LmrR-V15A-A92E-N14NDT_R  | AGGATCGCAHNGGTTTGAGCAC            |
| LmrR-V15A-A92E-A15NDT_F  | CAAACCAATNDTATCCTGCTGAAT          |
| LmrR-V15A-A92E-A15NDT_R  | AGCAGGATAHNATTGGTTTGAGC           |
| LmrR-V15A-A92E-M89NDT_F  | TGAAAACNDTCGCCTGGAATTC            |
| LmrR-V15A-A92E-M89NDT_R  | GGTACTTTTGNHAGCGGACCTT            |
| LmrR-V15A-A92E-F93NDT_F  | GCCTGGAANDTGAATCCTGGAGT           |
| LmrR-V15A-A92E-F93NDT_R  | CAGGATTCAHNTTCCAGGCGCAT           |
| LmrR-V15A-A92E-V99NDT_F  | GGAGTCGTNDTGACAAAATCATT           |
| LmrR-V15A-A92E-V99NDT_R  | ATTTTGTCAHNACGACTCCAGG            |
| LmrR-V15A-A92E-D100NDT_F | GAGTCGTGTGNDTAAAATCATTGA          |
| LmrR-V15A-A92E-D100NDT_R | ATGATTTTAHNCACACGACTCCAG          |

## 5. Catalysis

### ***Friedel-Crafts alkylation reactions***

#### ***Representative procedure for in vitro ArM catalysis***

The purified protein LmrR variant (12 or 120  $\mu\text{M}$ ) was incubated in catalysis buffer (20 mM MOPS, 150 mM NaCl, pH 7) containing 9 or 90  $\mu\text{M}$  Cu(II)-Phen at 4  $^{\circ}\text{C}$  for 30 min. Next, substrates were added to a concentration of 1 mM. The reaction (300  $\mu\text{L}$ ) was mixed by continuous inversion at 4  $^{\circ}\text{C}$ . 50  $\mu\text{L}$  of internal standard solution (2-phenylquinoline, 2 mM in  $\text{CH}_3\text{CN}$ ) was added to the reaction mixture and the crude product was isolated by liquid-liquid extraction using diethyl ether (3 x 0.5 mL). The organic phase was dried over  $\text{Na}_2\text{SO}_4$ , filtered and evaporated under reduced pressure. The crude reaction mixture was re-dissolved in 150  $\mu\text{L}$  of a heptane:propan-2-ol mixture (9:1) and analyzed by chiral separation on np-HPLC (Daicel Chiralpak AD) to determine yield and ee.

#### ***Representative procedure for ArM catalysis in cell-free extract***

An overnight induced *E. coli* C43(DE3) cell culture over-expressing LmrR variant (1 mL,  $\text{OD}_{600\text{nm}} = 4$ ) was washed and re-suspended in 500  $\mu\text{L}$  of catalysis buffer. The cells were sonicated (sonication tip diameter 2 mm, 5 min, 5 s ON, 10 s OFF, Amplitude 40%) and the cell debris pelleted by centrifugation (13000 rpm, 45 min, 4  $^{\circ}\text{C}$ ). 250  $\mu\text{L}$  of the cell free extract was incubated with 90  $\mu\text{M}$  Cu(II)-Phen at 4  $^{\circ}\text{C}$  for 1 h and continuously mixed on a rotator. The substrates were added to a concentration of 1 mM and the reaction (300  $\mu\text{L}$ ) was mixed by continuous inversion at 4  $^{\circ}\text{C}$ . 50  $\mu\text{L}$  of internal standard (2-phenylquinoline, 2 mM in  $\text{CH}_3\text{CN}$ ) was added to the reaction mixture and the crude product was isolated by liquid-liquid extraction using diethyl ether (3 x 0.5 mL). The organic phase was dried over  $\text{Na}_2\text{SO}_4$ , filtered and evaporated under reduced pressure. The crude reaction mixture was re-dissolved in 150  $\mu\text{L}$  of a heptane:propan-2-ol mixture (9:1), filtered with a 0.2  $\mu$  filter and analyzed by chiral separation on np-HPLC to determine yield and ee.

#### ***Representative procedure for in vivo ArM catalysis of Friedel-Crafts alkylation reactions***

An overnight induced *E. coli* C43(DE3) cell culture over-expressing LmrR variant (0.5 mL,  $\text{OD}_{600\text{nm}} = 4$ ) was washed with catalysis buffer and re-suspended in catalysis buffer containing 90  $\mu\text{M}$  Cu(II)-Phen. The sample was incubated at 4  $^{\circ}\text{C}$  for 1 h and continuously mixed on a rotator. The cells were washed and re-suspended in catalysis buffer. The substrates were added to a concentration of 1 mM and the reaction (300  $\mu\text{L}$ ) was mixed by continuous inversion at 4  $^{\circ}\text{C}$ . The workup of the crude reaction mixture was performed as described above, filtered with a 0.2  $\mu$  filter and analyzed by np-HPLC.

### ***Comparing catalytic activity of cell and supernatant fractions***

An overnight induced *E. coli* C43(DE3) cell culture over-expressing LmrR variant (0.5 mL, OD<sub>600nm</sub> = 4) was washed with catalysis buffer and re-suspended in catalysis buffer containing 90 μM Cu(II)-Phen. The sample was incubated at 4 °C for 1 h and continuously mixed on a rotator. The sample was centrifuged and the supernatant and cell pellet were separated. To both the supernatant and cell fraction we added substrates **1** and **2b** to a concentration of 1 mM and the reaction (300 μL) was mixed by continuous inversion at 4 °C. The workup of the crude reaction mixture was performed as described above, filtered with a 0.2 μ filter and analyzed by np-HPLC.

For some samples we did not perform the extraction. Instead, the samples were centrifuged and the supernatant and cell pellet again separated. To both the supernatant and the recycled cell fraction we added substrates **1** and **2a** to a concentration of 1 mM and the reaction (300 μL) was mixed by continuous inversion at 4 °C. The workup of the crude reaction mixture was performed as described above, filtered with a 0.2 μ filter and analyzed by np-HPLC.

### ***Influence of Glutathione on ArM catalysis***

The purified protein LmrR\_A92E\_M8D (120 μM) was incubated in catalysis buffer containing 1 or 10 mM glutathione at 4 °C for 30 min and continuously mixed on a rotator. Next, Cu(II)-Phen was added to a concentration of 90 μM and the sample mixed by continuous inversion at 4 °C for 30 min. Then the substrates **1** and **2** were added to a concentration of 1 mM and the reaction was mixed by continuous inversion at 4 °C.

### ***Diels-Alder reactions***

#### ***Representative procedure for in vitro ArM catalysis***

The purified protein LmrR variant (120 μM) was incubated in catalysis buffer (20 mM MOPS, 150 mM NaCl, pH 7) containing 90 μM Cu(II)-Phen at 4 °C for 30 min. Substrates, aza-chalcone (**4**, final concentration, 1 mM) and cyclopentadiene (**5**, final concentration, 33 mM) were added and the reaction (300 μL) was mixed by continuous inversion at 4 °C for 48 hours. 50 μL of internal standard (2-phenylquinoline, 2 mM in CH<sub>3</sub>CN) was added to the reaction mixture and the crude product was isolated by liquid-liquid extraction using diethyl ether (3 x 0.5 mL). The organic phase was dried over Na<sub>2</sub>SO<sub>4</sub>, filtered and evaporated under reduced pressure. The crude reaction mixture was re-dissolved in 150 μL of a heptane:propan-2-ol mixture (9:1)

and analyzed by chiral separation on np-HPLC (Daicel Chiralpak AD-H) to determine yield and ee of the Diels-Alder product **6**.

***Representative procedure for setting in vivo ArM catalysis of Diels-Alder reactions for Alanine scan***

An overnight induced *E. coli* C43(DE3) cell culture over-expressing LmrR variant (2 mL, OD<sub>600nm</sub> = 4) was washed with catalysis buffer and re-suspended in catalysis buffer containing 360 μM Cu(II)-Phen. The sample was incubated at 4 °C for 1 h and continuously mixed on a rotator. The cells were washed and re-suspended in catalysis buffer. The substrates, aza-chalcone (**4**, final concentration, 1 mM) and cyclopentadiene (**5**, final concentration, 33 mM) were added and the reaction (300 μL) was mixed by continuous inversion at 4 °C for 72 hours. 50 μL of internal standard (2-phenylquinoline, 2 mM in CH<sub>3</sub>CN) was added to the reaction mixture and the crude product was isolated by liquid-liquid extraction using diethyl ether (3 x 0.5 mL). The organic phase was dried over Na<sub>2</sub>SO<sub>4</sub>, filtered and evaporated under reduced pressure. The crude reaction mixture was re-dissolved in 150 μL of a heptane:propan-2-ol mixture (9:1), filtered with a 0.2 μ filter and analyzed by chiral separation on np-HPLC to determine yield and ee.

***Representative procedure for setting in vivo ArM catalysis of Diels-Alder reactions***

An overnight induced *E. coli* C43(DE3) cell culture over-expressing LmrR variant (2 mL, OD<sub>600nm</sub> = 4) was washed with catalysis buffer and re-suspended in catalysis buffer containing 360 μM Cu(II)-Phen. The sample was incubated at 4 °C for 1 h and continuously mixed on a rotator. The cells were washed and re-suspended in catalysis buffer. The substrates were added to a concentration of 1 mM and the reaction (300 μL) was mixed by continuous inversion at 4 °C. The workup of the crude reaction mixture was performed as described above, filtered with a 0.2 μ filter and analyzed by np-HPLC.

***Comparing catalytic activity of cell and supernatant fractions***

An overnight induced *E. coli* C43(DE3) cell culture over-expressing LmrR variant (1 mL, OD<sub>600nm</sub> = 4) was washed with catalysis buffer and re-suspended in catalysis buffer containing 180 μM Cu(II)-Phen. The sample was incubated at 4 °C for 1 h and continuously mixed on a rotator. The sample was centrifuged and the supernatant and cell pellet were separated. To both the supernatant and cell fraction the substrates, aza-chalcone (final concentration, 1 mM) and cyclopentadiene (final concentration, 33 mM) were added and the reaction (300 μL) was mixed by continuous inversion at 4 °C for 48 hours. The workup of the crude reaction mixture was performed as described above, filtered with a 0.2 μ filter and analyzed by np-HPLC.

For some samples we did not perform the extraction. Instead, the samples were centrifuged and the supernatant and cell pellet again separated. To both the supernatant and the recycled cell fraction the substrates, aza-chalcone (final concentration, 1 mM) and cyclopentadiene (final concentration, 33 mM) were added and the reaction (300  $\mu$ L) was mixed by continuous inversion at 4 °C for 48 hours. The workup of the crude reaction mixture was performed as described above, filtered with a 0.2  $\mu$  filter and analyzed by np-HPLC.



## 6. ICP-OES quantification of cellular copper content

An overnight induced *E. coli* C43(DE3) cell culture over-expressing LmrR (10 mL,  $OD_{600nm} = 4$ ) was washed with catalysis buffer and re-suspended in buffer containing 90  $\mu$ M Cu(II)-Phen. The sample was incubated at 4 °C for 1 h and continuously mixed on a rotator. The sample was centrifuged, and the supernatant and cell pellet were separated. The cell pellet was washed 10 mL of catalysis buffer and the supernatant from the current and previous step was pooled. The wet cell pellet and the pooled supernatant were transferred to pre-weighed pressure vials and dried in an oven at 80 °C for 48 h. The dry weight of the cell pellet was measured. The dried contents of the pressure vials were dissolved in 2.5 mL of 5% HNO<sub>3</sub> (in double distilled water). The samples were boiled at 115 °C for 1-2 days, after which the sample was filtered and analyzed by ICP-OES to determine the amount of Cu. The Cu content of the prepared 90  $\mu$ M Cu(II)-Phen solution, used to incubate the cells with, was also measured by ICP-OES by Mr. J. van de Velde at the analytical department of the Stratingh Institute for Chemistry.

## **7. Inhibitor studies**

### ***In vitro and in vivo ArM catalysis with inhibitors***

The purified protein LmrR (120  $\mu$ M) was incubated in catalysis buffer containing 360  $\mu$ M of dye (4 equivalents with respect to Cu(II)-Phen) at 4 °C for 30 min and continuously mixed on a rotator. Next, Cu(II)-Phen was added to a concentration of 90  $\mu$ M and the sample incubated at 4 °C for 30 min and continuously mixed. Then the substrates **1** and **2b** were added to a concentration of 1 mM and the reaction was mixed by continuous inversion at 4 °C. The workup of the crude reaction mixture was performed as described above and analyzed by np-HPLC.

An overnight induced *E. coli* C43 (DE3) cell culture over-expressing LmrR (2 mL, OD<sub>600nm</sub> = 4) was washed with catalysis buffer and re-suspended in catalysis buffer containing 180, 360 or 720  $\mu$ M dye (0.5, 1 or 2 equivalents with respect to Cu(II)-Phen). The sample was incubated at 4 °C for 30 min and continuously mixed on a rotator. The cells were washed with catalysis buffer and re-suspended in catalysis buffer containing 360  $\mu$ M Cu(II)-Phen. The sample was incubated at 4 °C for 1 h and continuously mixed on a rotator. The cells were washed and re-suspended in catalysis buffer. The substrates **1** and **2b** were added to a concentration of 1 mM and the reaction was mixed by continuous inversion at 4 °C. The workup of the crude reaction mixture was performed as described above, filtered with a 0.2  $\mu$  filter and analyzed by np-HPLC.

### ***Live cell confocal microscopy***

*E. coli* BW25113 was initially grown overnight from a glycerol stock in LB (lysogeny broth) at 30 °C at 180 rpm. The overnight culture was used to inoculate 3 mL of fresh LB next day and incubated at 30 °C at 180 rpm until the OD reached 0.8. At this stage, 30  $\mu$ L of sterile 10 % arabinose was added and the cells were grown overnight at 30 °C at 180 rpm. The overnight culture was used to inoculate 3 mL of fresh LB containing 0.1 % arabinose next day and incubated at 30 °C at 180 rpm till OD reached 0.6. 500  $\mu$ L of culture was then centrifuged at 11000  $\times g$  for 1 min. The supernatant was removed and the cells were re-suspended in 250  $\mu$ L LB medium. The cells were now incubated with 3.5  $\mu$ L of 25.36 mM EtBr stock solution (final concentration 360  $\mu$ M) and 2.3  $\mu$ L of 1.62 mM Hoechst 33342 stock solution (final concentration 15  $\mu$ M) for 5 min. The cells were now washed in 1000  $\mu$ L LB medium thrice and then re-suspended in 100  $\mu$ L LB in the final step of washing. All procedures were carried out at 30 °C. Confocal imaging was performed on (3-aminopropyl)triethoxysilane (APTES)-treated cover slides(APTES) coated

slides on a LSM710 Zeiss confocal laser scanning microscope (Zeiss, Oberkochen, Germany). The slides were prepared by first sonicating for 1 h in 5 M KOH, rinsing 10 times with MQ and blowing off the remaining MQ with pressurized nitrogen. The slides were then incubated in acetone that contained 2 % v/v (3-aminopropyl)triethoxysilane for 15 min at room temperature. Thereafter, the acetone and APTES was removed and the slides 10 times were rinsed with milliQ water. The remaining milliQ water was blown off with pressurized nitrogen. For imaging 20  $\mu$ L of the cell suspension was used on the cover-slide and an object slide was placed on top for stability. The stage temperature was maintained at 30 °C. The slide was used for no longer than 20 min after depositing the cells.

### ***Fluorescence spectra***

The emission spectra of EtBr and Hoechst 33342 with and without LmrR were recorded on a TECAN Spark10M fluorimeter at 30 °C. In a typical measurement, a final concentration of 25  $\mu$ M of LmrR and 1  $\mu$ M of either dye was mixed in 20 mM MOPS, 150 mM NaCl buffered at pH 7.0 and incubated for 5 min at 30 °C. Both EtBr and Hoechst 33342 were excited at 360 nm and the emission spectra were recorded from 540-750 nm and 380-650 nm (in 2 nm intervals) respectively. Both excitation and emission bandwidths were kept constant at 5 nm. The data was measured in triplicates over time to ascertain binding and effect on fluorescence emission was temporally stable.

### ***Fluorescence titration experiment***

Titration were performed with 3  $\mu$ M solutions of protein dimer (2 mL) titrated with 80  $\mu$ M solution of compound in the appropriate buffer solution. 30  $\mu$ M protein conjugates solutions (dimer) in buffer solution (absorbance checked by Nanodrop 2000, Fisher Scientific) was prepared and then diluted tenfold. Emission spectra were recorded at room temperature after 2 min incubation. The sample was excited at 295 nm and emission spectra were obtained from 310 nm to 450 nm. The excitation and emission slit widths were 5 nm. All the experiments were performed in duplicate with independent batches of the corresponding compound and protein dimer. The intensity of fluorescence at the maximum of the emission spectra of the tryptophan (345 nm) was plotted against the concentration ratio between Cu(II) complex and protein dimer.

The data obtained from the titration of the corresponding compound with LmrR were fitted using non-linear regression analysis (program OriginPro 8.5), employing equation 1<sup>3</sup>.

$$FQ = \frac{k}{2} \left( C_P + C_L + K_d - \sqrt{(C_P + C_L + K_d)^2 - 4C_P C_L} \right) \quad (1)$$

where FQ is the tryptophan fluorescence quenching ( $\Delta QF$ ) by the compound (expressed as  $(I_{\max}-I)/I_{\max}$ ), with  $I_{\max}$  the intensity of fluorescence in the absence of quencher,  $I$  the intensity of fluorescence upon addition of quencher and  $I_0$  the intensity of fluorescence at saturation).  $C_p$  and  $C_L$  are the total concentrations of protein and compound, respectively, and  $k$  is a constant.

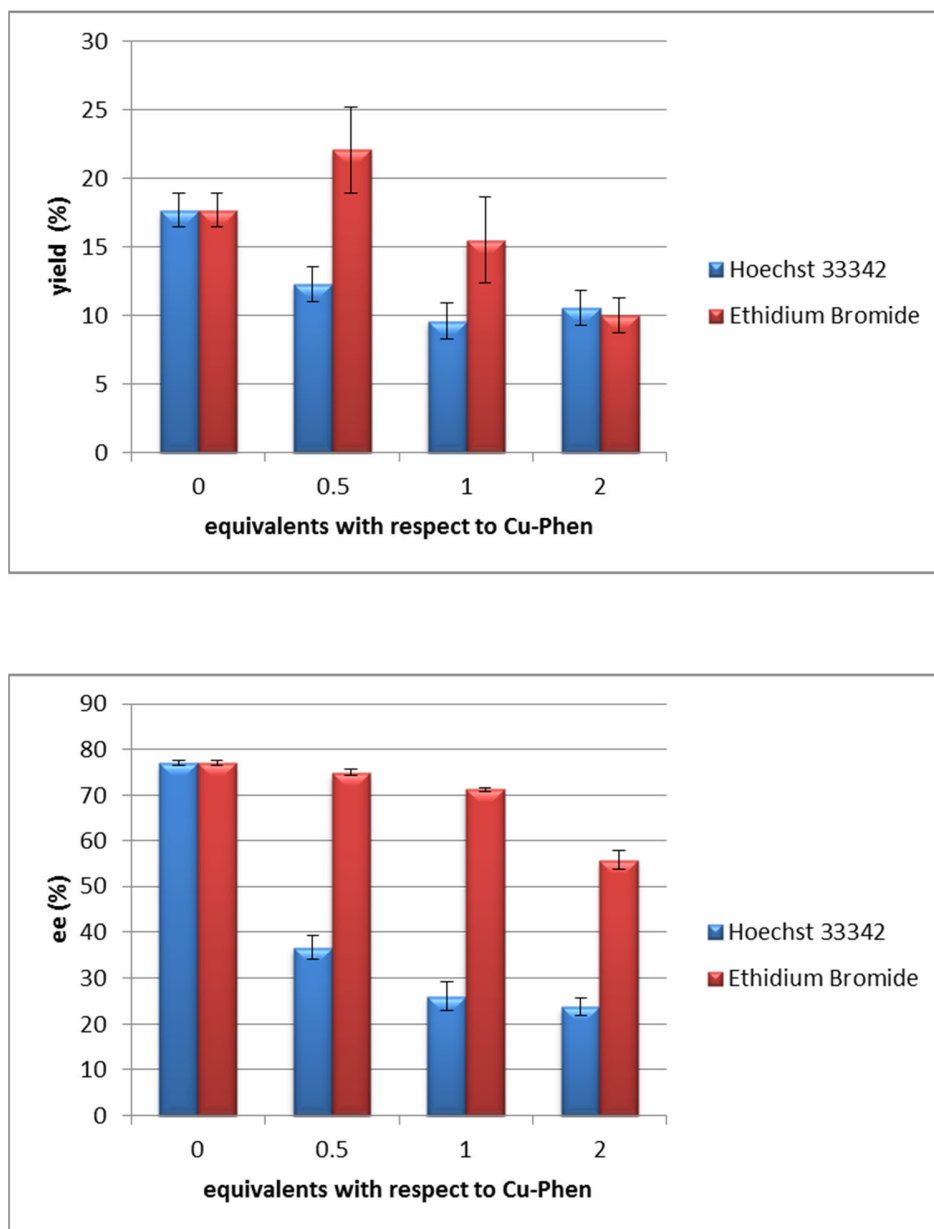

Figure S1. Effect of dyes on in vivo F-C Alkylation of 1 and 2a.

**Determining  $K_d$  values with Fluorescence titration experiments**

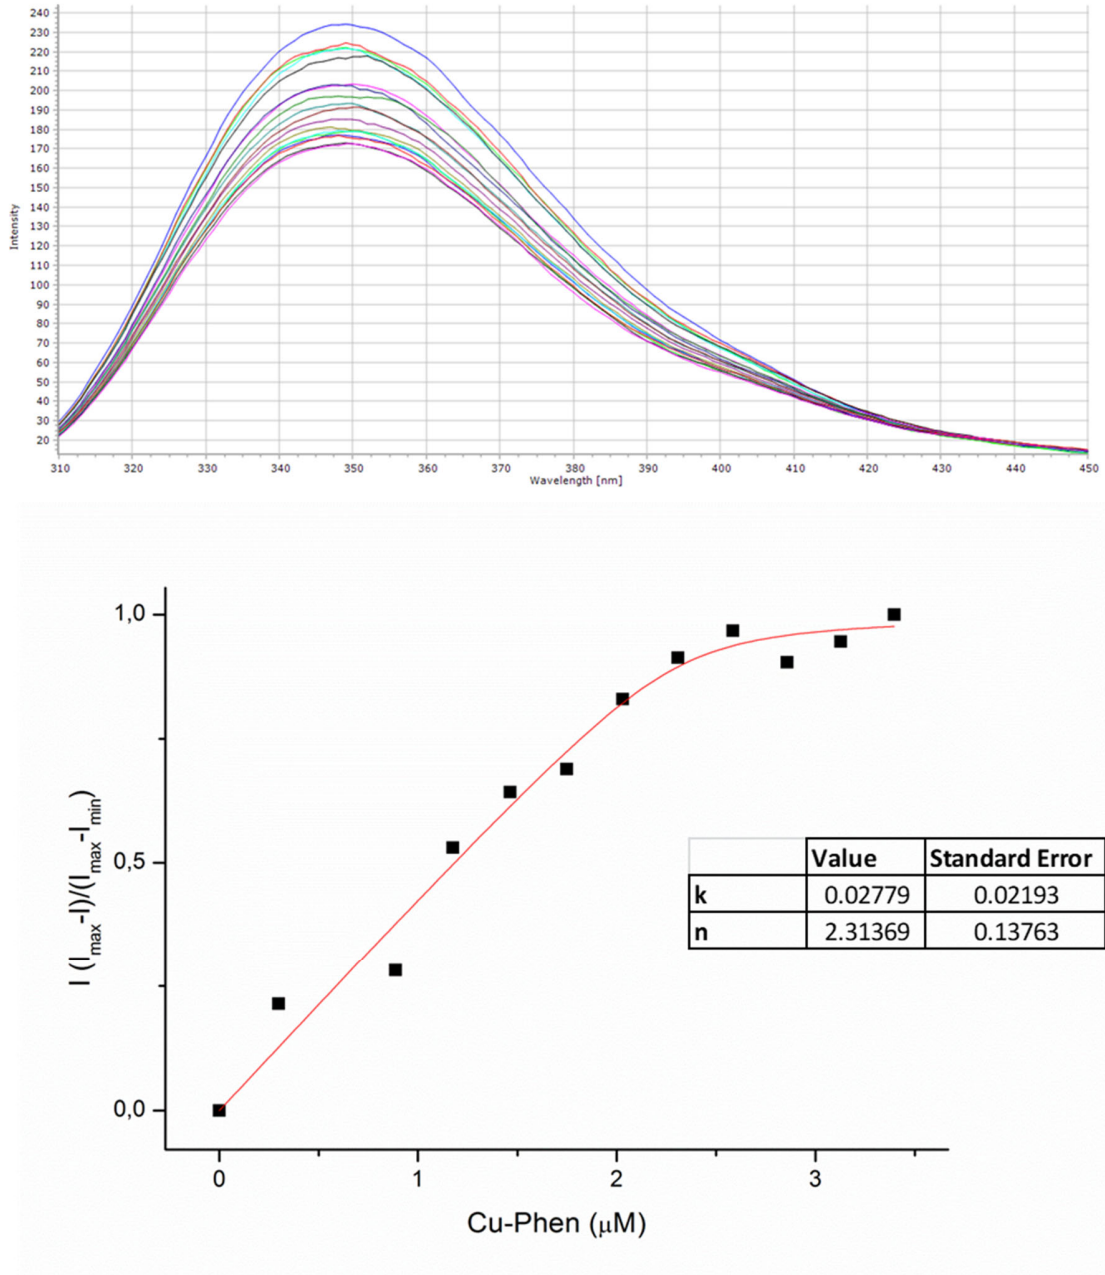

**Figure S2. Titration of Cu(II)-Phen with LmrR\_A92E\_M8D**

Binding constant of Cu(II)-Phen with LmrR\_A92E\_M8D

| Binding constant $K_d$ (nM) |
|-----------------------------|
| $16.30 \pm 16.26$           |

Determining  $K_d$  values by Fluorescence titration experiments

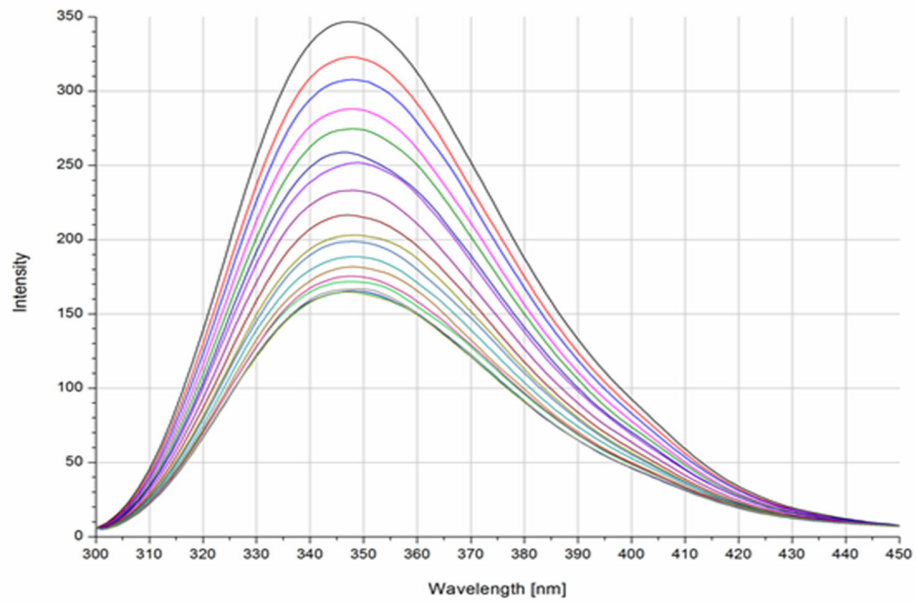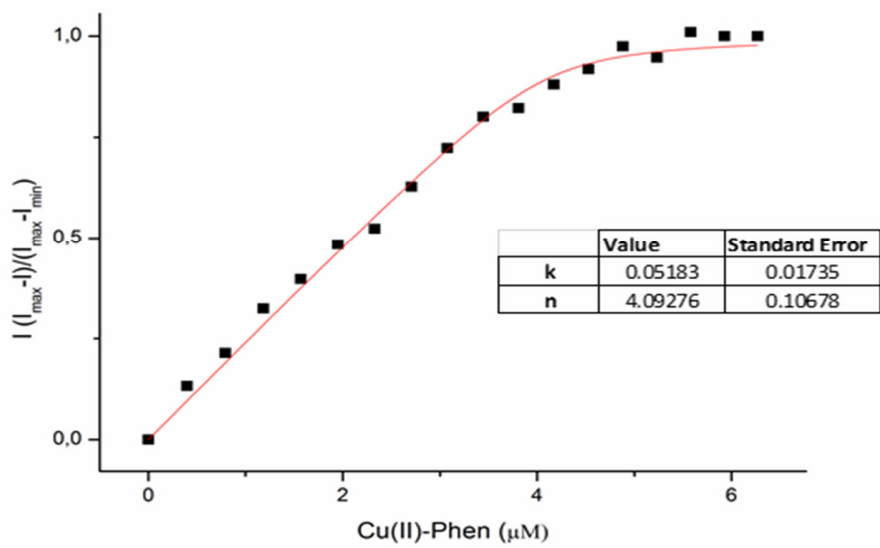

Figure S3. Titration of Cu(II)-Phen with LmrR\_V15A\_A92E

Binding constant of Cu(II)-Phen with LmrR\_V15A\_A92E

| Binding constant $K_d$ (nM) |
|-----------------------------|
| $56 \pm 5$                  |

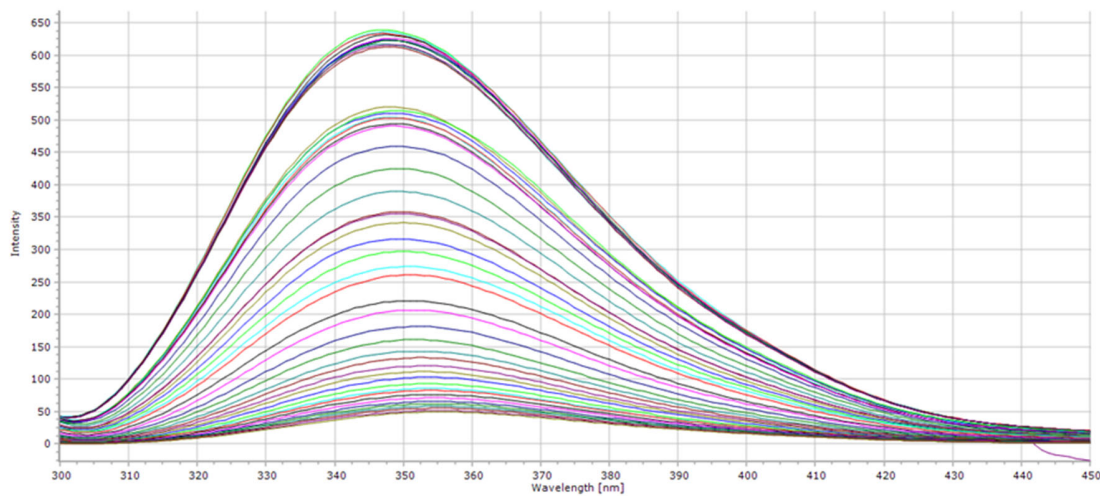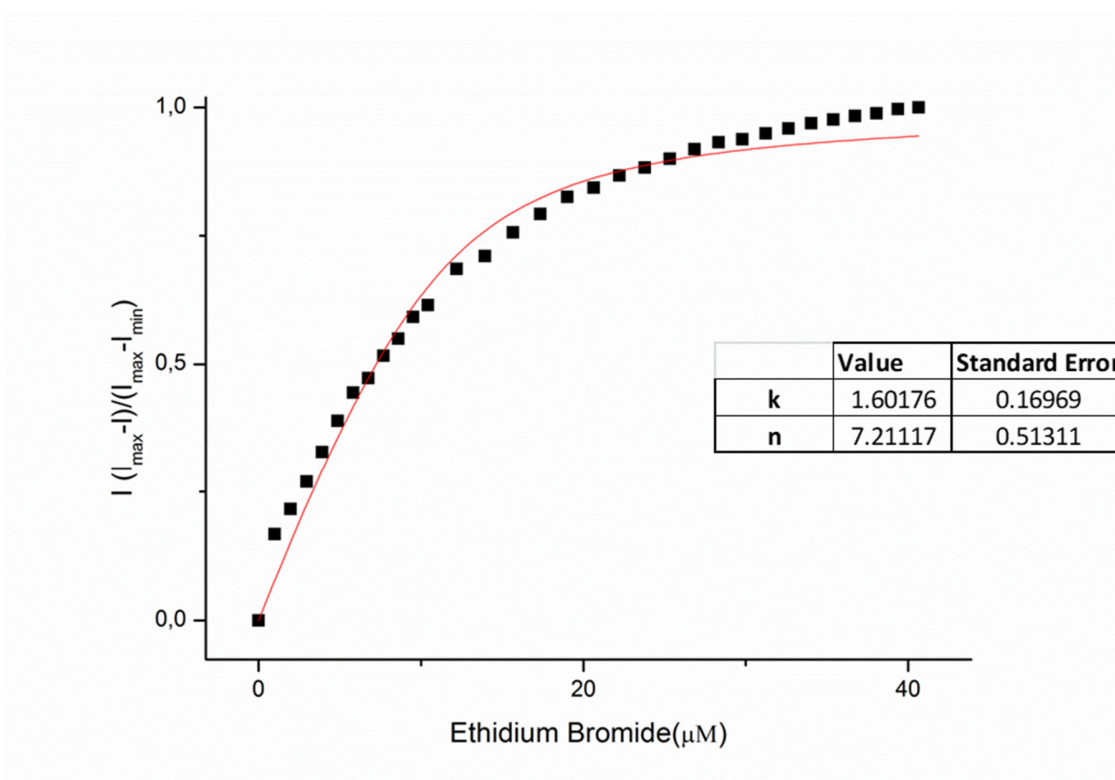

**Figure S4. Titration of Ethidium Bromide with LmrR**

Binding constant of EtBr with LmrR

| Binding constant $K_d$ ( $\mu\text{M}$ ) |
|------------------------------------------|
| $1.70 \pm 0.13$                          |

Confocal Microscopy of stained live *E. coli* cells

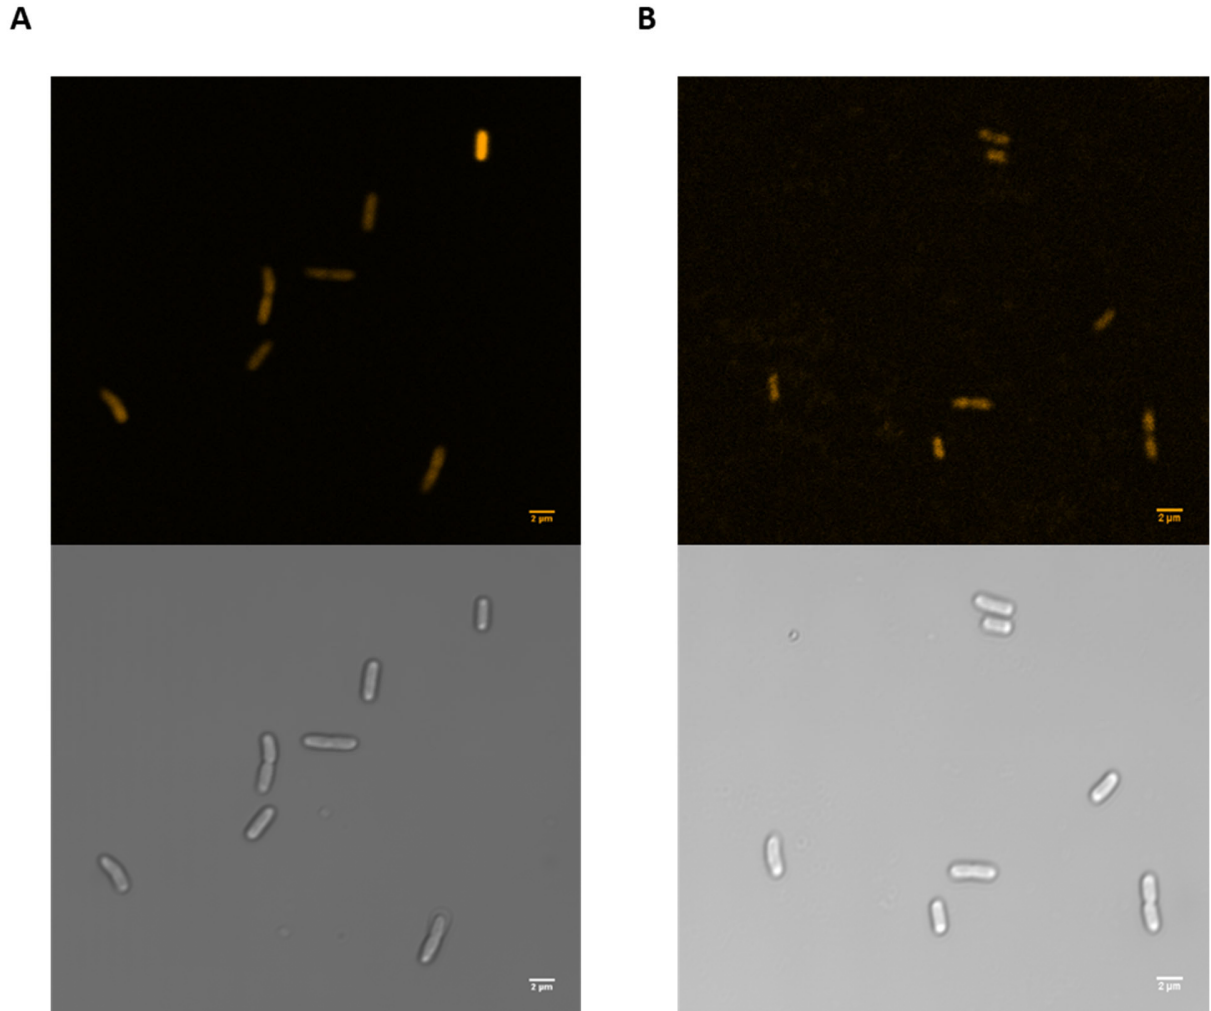

**Figure S5. Confocal microscopy of live *E. coli* cells incubated with Hoechst 33342. A) Induced LmrR gene expression in *E. coli*. B) Uninduced LmrR gene expression in *E. coli*.**



A

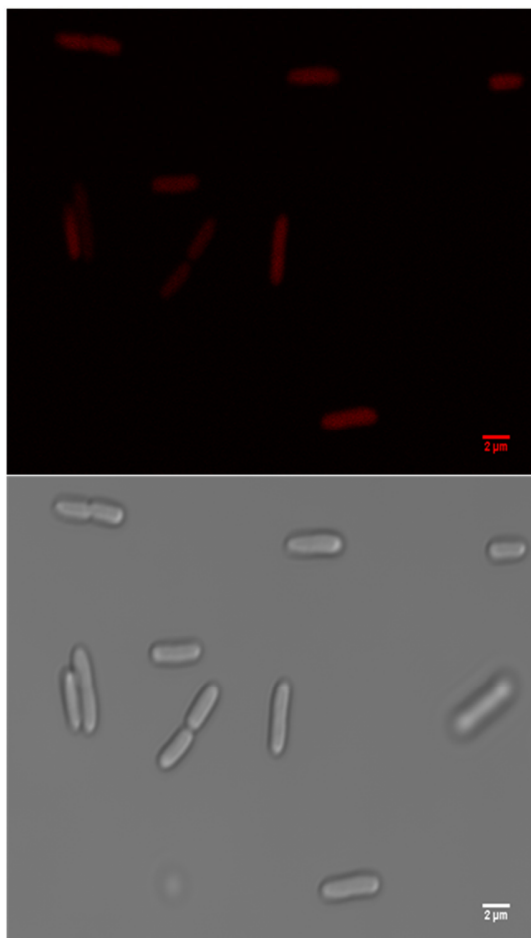

B

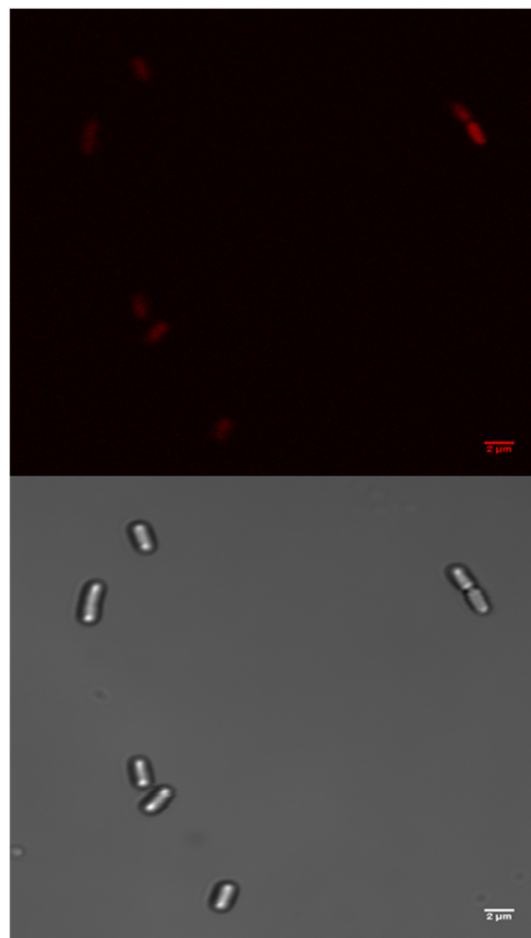

**Figure S6. Confocal microscopy of live *E. coli* cells incubated with ethidium bromide. A) Induced LmrR gene expression in *E. coli*. B) Uninduced LmrR gene expression in *E. coli*.**

*E. coli* BW25113 (pBAD-cyt-LmrR) + HOECHST

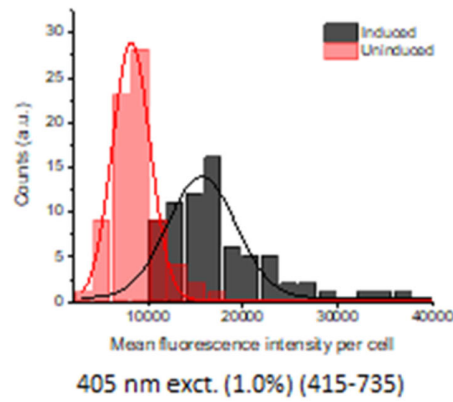

*E. coli* BW25113 (pBAD-cyt-LmrR) + EtBr

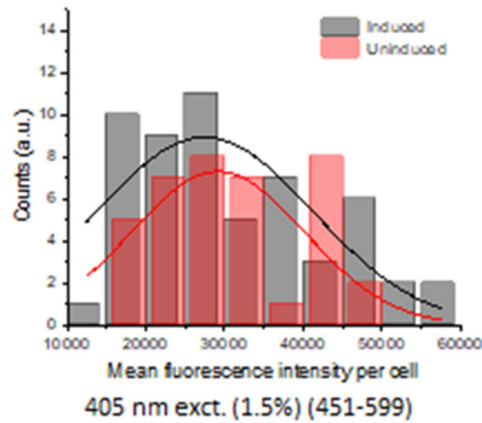

**Figure S7. Comparing results from live cell confocal imaging of *E. coli* incubated with dyes.**

From this comparison it can be inferred that Ethidium Bromide has difficulties crossing the double membrane barrier of *E. coli* and binding LmrR expressed in the cytoplasm. In contrast, Hoechst 33342 is permeable through the cell membranes and shows doubling in fluorescence intensity upon staining *E. coli* cells expressing LmrR in the cytoplasm.

**Fluorescence measurement of free and LmrR bound dye**

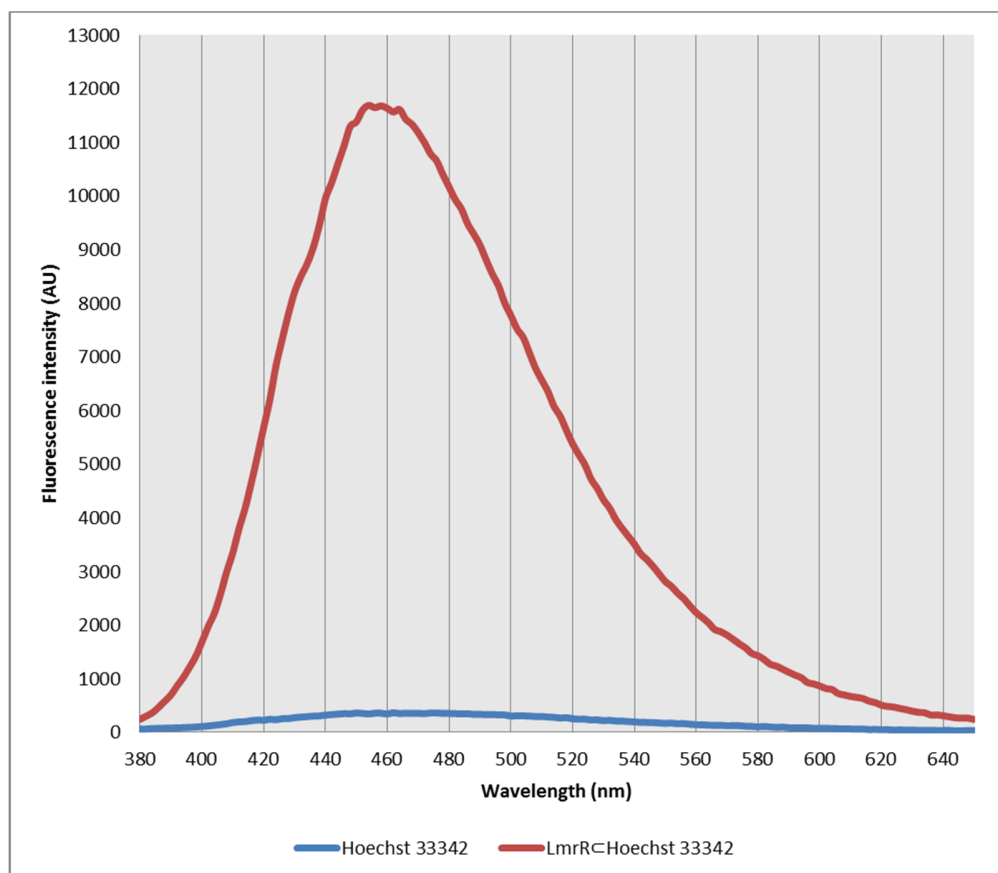

**Figure S8. Fluorescence measurement of free and LmrR bound Hoechst 33342.**

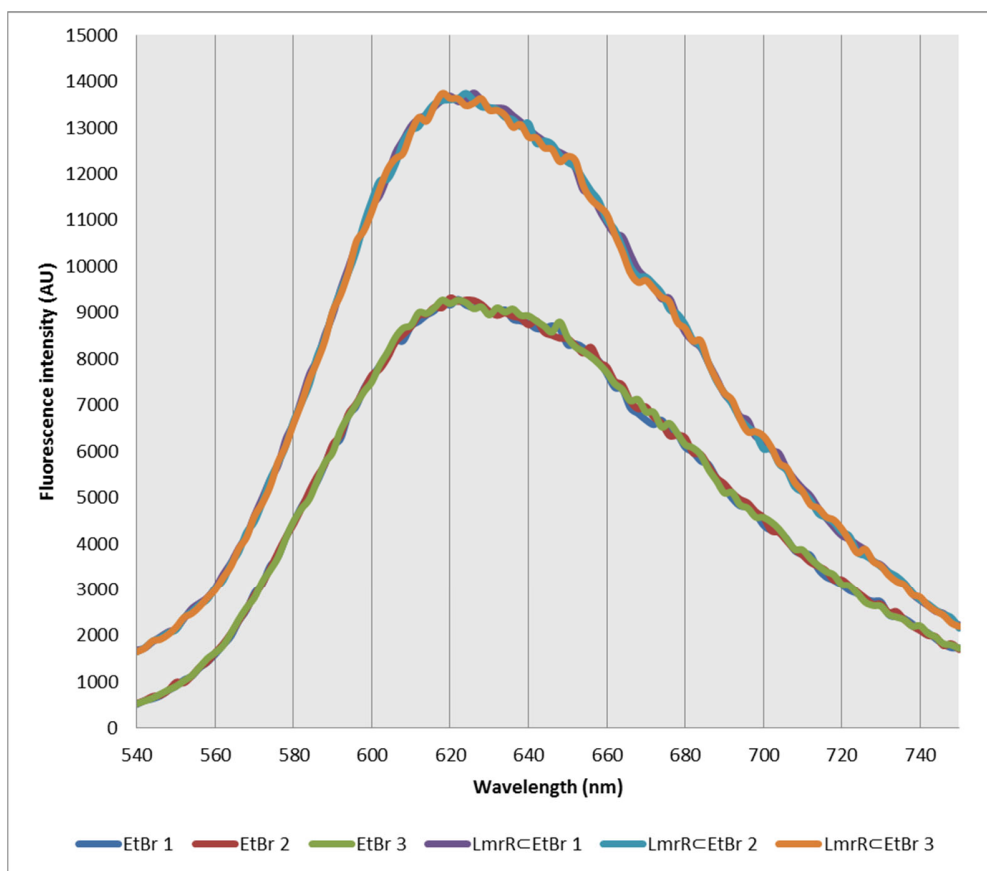

Figure S9. Fluorescence measurement of free and LmrR bound ethidium bromide.

## **8. Cell fractionation**

To identify the localization of LmrR and SRP-LmrR over-expressed in the *E. coli* NEB10beta, periplasmic extraction and cell lysis was performed for SDS-PAGE analysis. Cell suspension (1mL, OD<sub>600nm</sub> = 4) was spun down in an Eppendorf tube and the supernatant discarded. For some samples the cells were re-suspended in catalysis buffer containing 90 μM Cu(II)-Phen. These samples were incubated at 4 °C for 1 h and continuously mixed on a rotator. All the cell samples were washed and re-suspended in catalysis buffer. Then the cells were re-suspended in 250 μL of osmotic shock solution (200 mM Tris, 20% w/v sucrose, 1 mM EDTA, pH 7.5). The samples were slowly shaken in a Thermo mixer (23 °C, 400 rpm, 10 min). Next, the cells were spun down (4000 rpm, 5 min, 4 °C) and the supernatant discarded. The Eppendorf tubes were transferred to ice and the cell pellets carefully re-suspended with 250 μL of ice-cold 5 mM MgSO<sub>4</sub> solution. The sample was incubated on ice for 10 min, centrifuged and the supernatant (periplasmic fraction) collected. The remaining cell pellet was re-suspended in MQ to an OD<sub>600nm</sub> of 6. Transfer 15 μL of the cell suspension to a new Eppendorf tube and add 5 μL of 5x SDS-PAGE loading dye. Boil the sample at 95 °C for 15 minutes and centrifuge (13000 rpm, 10 min, 25 °C) the cell debris to obtain the cytoplasmic fraction.

## 9. NMR studies

**Table S9.** Backbone assignments of LmrR used in this work, continued in Table S10.

| Residue | N      | H    | C <sub>α</sub> | C <sub>β</sub> |
|---------|--------|------|----------------|----------------|
| A2      | -      | -    | 52             | 18.64          |
| E3      | 120.47 | 8.3  | 55.37          | 29.91          |
| P5      | -      | -    | 63.04          | 29.85          |
| K6      | 126.35 | 7.92 | 56.92          | 29.85          |
| L21     | 118.87 | 7.67 | 55.75          | 40.65          |
| K22     | 123.28 | 8.11 | 58.41          | -              |
| Q23     | 115.3  | 7.35 | 55.61          | 27.01          |
| G24     | 107.23 | 7.35 | 44.32          | -              |
| D25     | 122.56 | 8.45 | 54.48          | 39.16          |
| N26     | 118.9  | 8.39 | 51.34          | 41.92          |
| Y27     | 119.86 | 9.36 | 53.71          | 40.22          |
| V28     | 122.29 | 9.34 | 68.56          | 30.04          |
| Y29     | 117.18 | 7.7  | 61.1           | 36.84          |
| G30     | 107.43 | 5.71 | 46.05          | -              |
| I31     | 123.28 | 7.83 | 64.95          | 37             |
| I32     | 119.1  | 7.72 | 65.7           | 37.28          |
| K33     | 120.44 | 7.61 | 59.16          | 31.66          |
| Q34     | 118.85 | 7.97 | 58.33          | 27.63          |
| V35     | 119.97 | 8.33 | 66.7           | 30.02          |
| K36     | 124.24 | 8.1  | 59.64          | 31.44          |
| E37     | 118.52 | 8.08 | 58.9           | 28.41          |
| A38     | 121.62 | 8.3  | 53.58          | 18.6           |
| S39     | 109.53 | 7.66 | 57.02          | 64.23          |
| N40     | -      | -    | 54.11          | 36.73          |
| G41     | 104.11 | 8.74 | 44.57          | -              |
| E42     | 118.97 | 7.42 | 57.53          | 29.78          |
| M43     | 118.53 | 8.16 | 54.59          | 32.48          |

|     |        |      |       |       |
|-----|--------|------|-------|-------|
| E44 | 128.94 | 8.37 | 53.86 | 29.32 |
| L45 | 126.07 | 8.37 | 53.7  | 42.26 |
| N46 | 118.12 | 7.92 | 51.44 | 40    |
| E47 | 124.82 | 9.02 | 59.88 | 28.51 |
| A48 | 119.92 | 8.06 | 54.72 | 17.14 |
| T49 | 114.82 | 7.65 | 65.23 | 67.99 |
| L50 | 121.93 | 7.47 | 57.94 | 39.42 |
| Y51 | 116.73 | 8.1  | 61.52 | 36.43 |

**Table S10.** Backbone assignments of LmrR used in this work, continued from Table S9.

| Residue | N      | H    | C <sub>α</sub> | C <sub>β</sub> |
|---------|--------|------|----------------|----------------|
| T52     | 114.31 | 7.48 | 65.72          | 68.43          |
| I53     | 123.89 | 7.57 | 64.65          | 37.34          |
| F54     | 119.45 | 8.86 | 58.12          | 35.66          |
| R56     | 120.17 | 7.04 | 57.83          | 28.97          |
| L57     | 118.26 | 8.28 | 57.72          | 41.53          |
| E58     | 121.88 | 8.78 | 58.51          | 28.81          |
| D60     | 117.03 | 7.79 | 54.75          | 40.66          |
| G61     | 107.46 | 7.8  | 45.23          | -              |
| I62     | 122.47 | 8.1  | 61.67          | 37.34          |
| I63     | 108.5  | 6.8  | 57.37          | 40.59          |
| S64     | 116.88 | 9.29 | 56.37          | 65.56          |
| S65     | 114.31 | 8.13 | 56.13          | 67.2           |
| Y66     | 117.07 | 8.32 | 55.82          | 38.54          |
| W67     | 120.19 | 8.66 | 56             | 30.02          |
| G68     | 110.86 | 9.33 | 44.1           | -              |
| D69     | 120.14 | 8.35 | 53.86          | 41.14          |
| E70     | 122.23 | 8.5  | 56.37          | -              |
| S71     | 118.11 | 8.38 | 59.3           | -              |
| G73     | 109.1  | 8.12 | 44.77          | -              |

|      |        |      |       |       |
|------|--------|------|-------|-------|
| R75  | 121.04 | 8.22 | 55.45 | -     |
| R76  | 124.01 | 8.63 | 54.3  | -     |
| K77  | 126.51 | 8.22 | 54.74 | -     |
| Y78  | 125.95 | 8.44 | 56.62 | -     |
| Y79  | 115.22 | 8.49 | 56.25 | -     |
| R80  | 117.44 | 8.52 | 52.6  | -     |
| L81  | 124.99 | 8.52 | 54.81 | -     |
| T82  | 115.86 | 7.87 | 60.24 | -     |
| E83  | 121.12 | 9.02 | 60.32 | 28.17 |
| I84  | 120.3  | 7.89 | 63.7  | 36.78 |
| G85  | 111.42 | 8.05 | 48.46 | -     |
| H86  | 120.95 | 8.55 | 60.71 | 30.42 |
| E107 | 118.98 | 7.79 | 58.7  | -     |
| A108 | 122.67 | 7.94 | 53.88 | 17.66 |
| N109 | 116.85 | 8.13 | 53.81 | 37.49 |
| K110 | 121.38 | 7.65 | 56.86 | 31.38 |
| K111 | 120.88 | 8.01 | 56.91 | 31.57 |
| S112 | 116.24 | 8.08 | 58.89 | 63.3  |
| E113 | 122.94 | 8.16 | 56.68 | 29.23 |
| A114 | 124.08 | 8    | 52.51 | 18.19 |
| I115 | 120.36 | 7.87 | 61.22 | 37.45 |



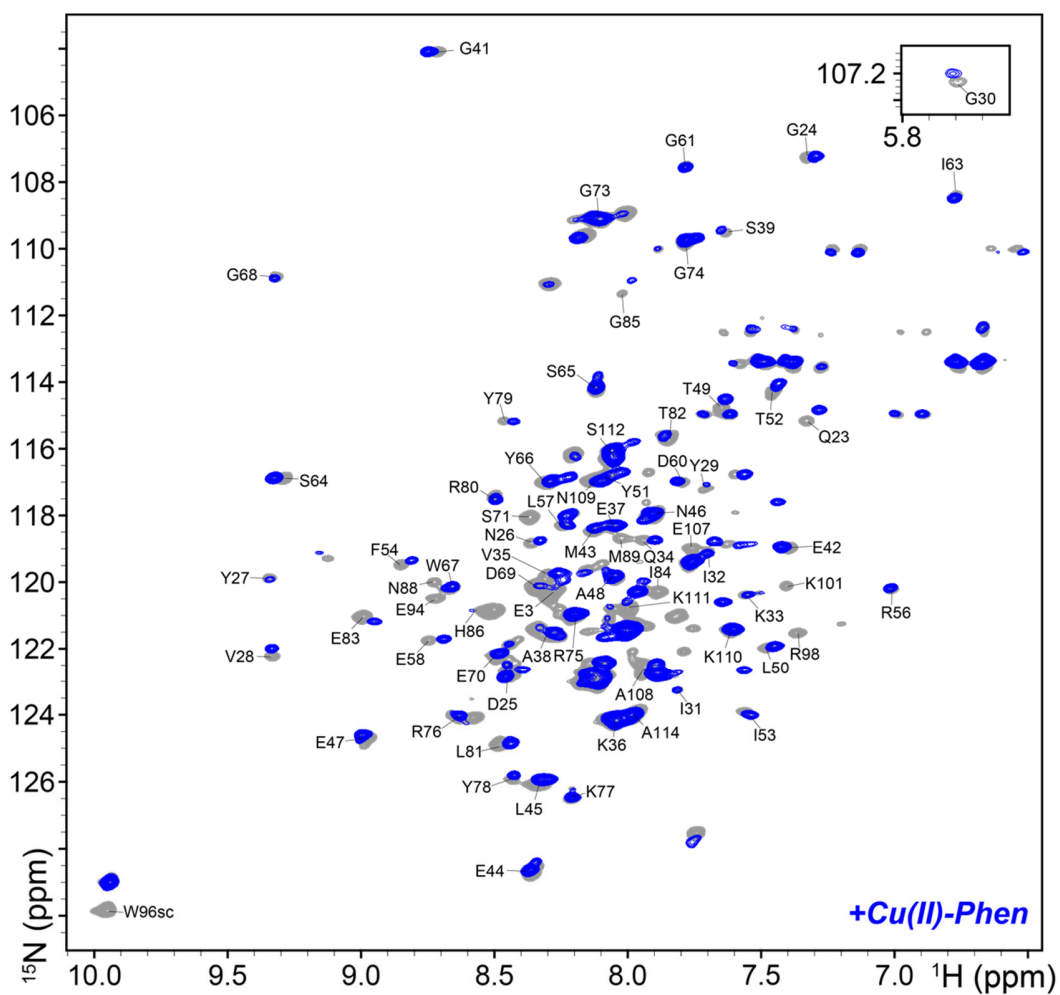

**Figure S10.** Solution state  $^{15}\text{N}$ - TROSY experiment on perdeuterated LmrR with and without Cu(II)-Phen. Note that W96 side chain is a tentative assignment on the basis of strong signal loss after the addition of Cu(II)-Phen.

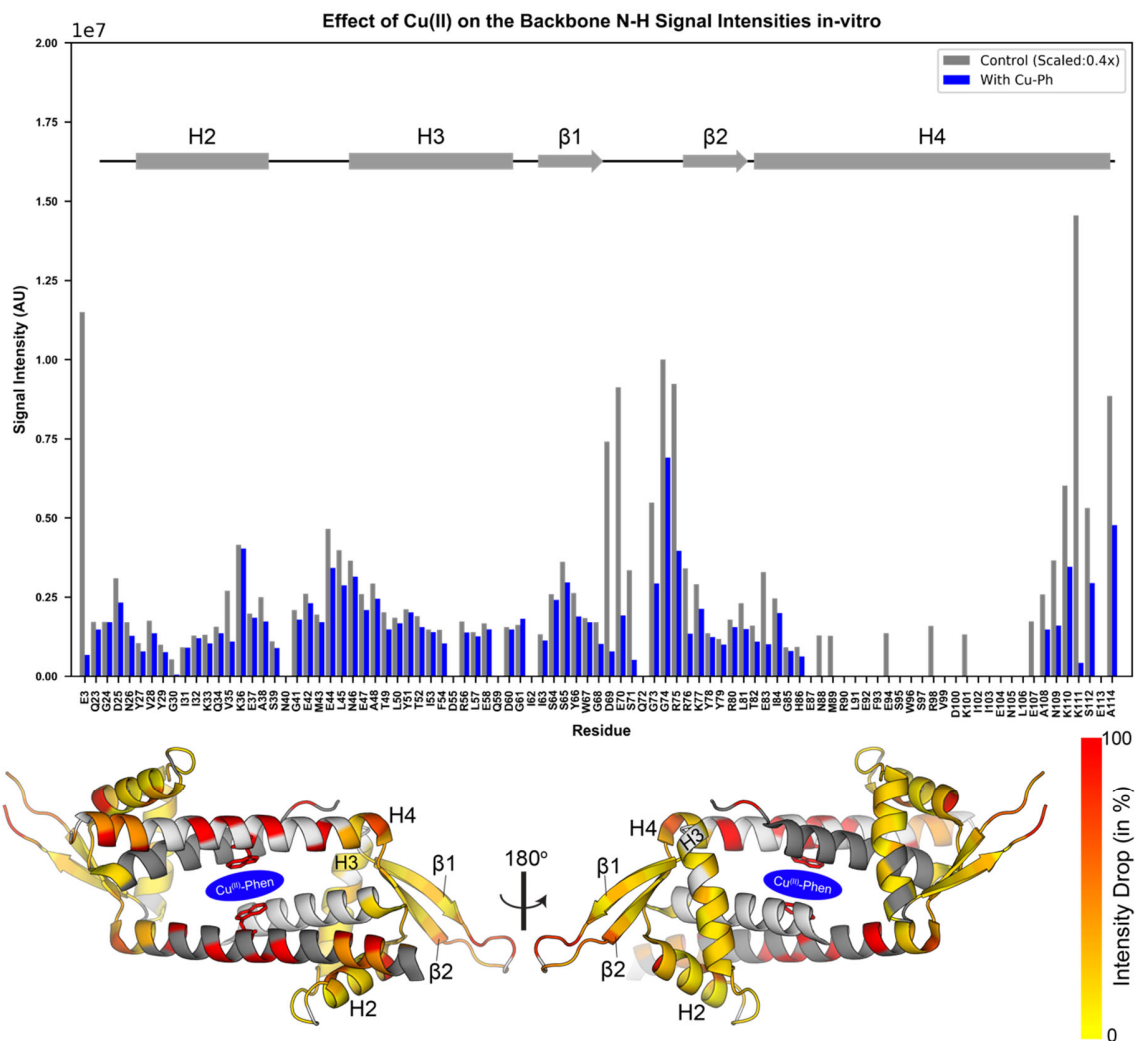

**Figure S11.** Residue-specific drop in NMR signal intensity of the backbone amides in LmrR due to paramagnetic quenching effects (in solution-state NMR). Data are plotted on the crystal structure of LmrR (PDB ID: 3F8F). Residues that are not assigned are shown in gray on the structure, with the exception of W96, where we observed quenching of side-chain resonance (See Figure S10 for the 2D spectrum).

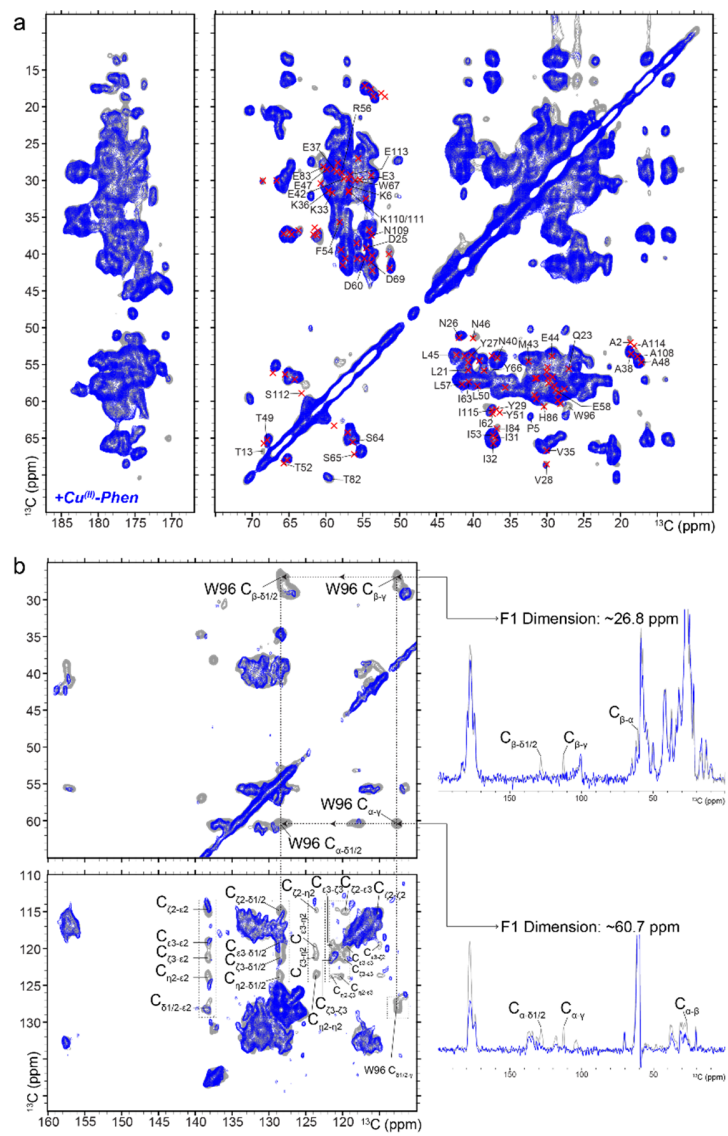

**Figure S12.** a) 2D  $^{13}\text{C}, ^{13}\text{C}$  correlated PARIS spectrum of LmrR in the microcrystalline state with (blue) and without (grey) Cu(II)-Phen. Red crosses are *in-vitro* solution NMR derived assignments of the  $\text{C}_\alpha\text{-C}_\beta$  correlations (Table S9-10). The residues tentatively assigned in the ssNMR spectra are indicated without crosses. b) Analysis of the aromatic region of the spectrum shows selective and partial quenching of aromatic side chains of Trp, with the complete quenching of the backbone resonances (of W96: alpha-helical Trp) correlating with the aromatics.

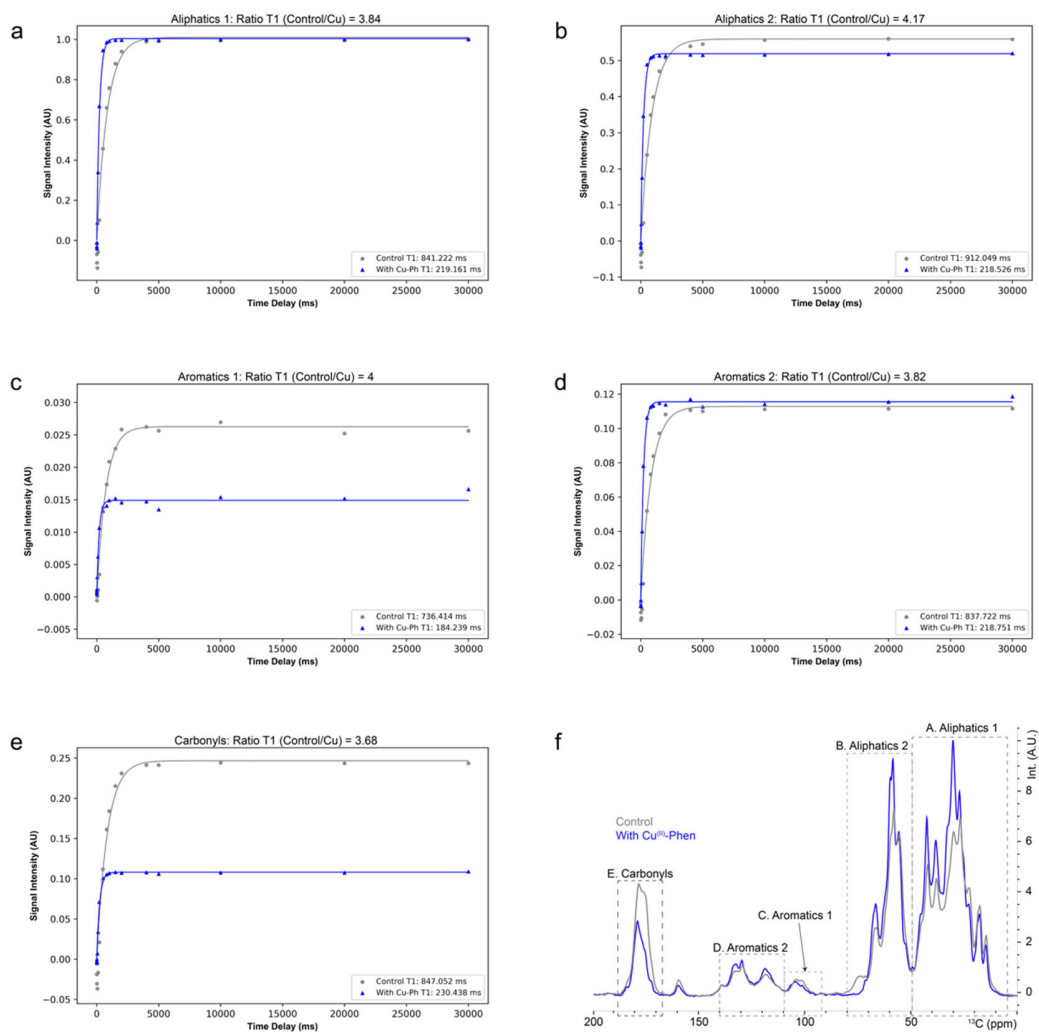

**Figure S13.** Relaxation profiles (a-e) of different spectral regions of LmrR in a  $^1\text{H}$ - $^{13}\text{C}$  cross-polarized saturation recovery experiment (f), before and after addition of Cu(II)-Phen. In the presence of Cu(II), the relaxation times are between 3.68-4.17 times faster.

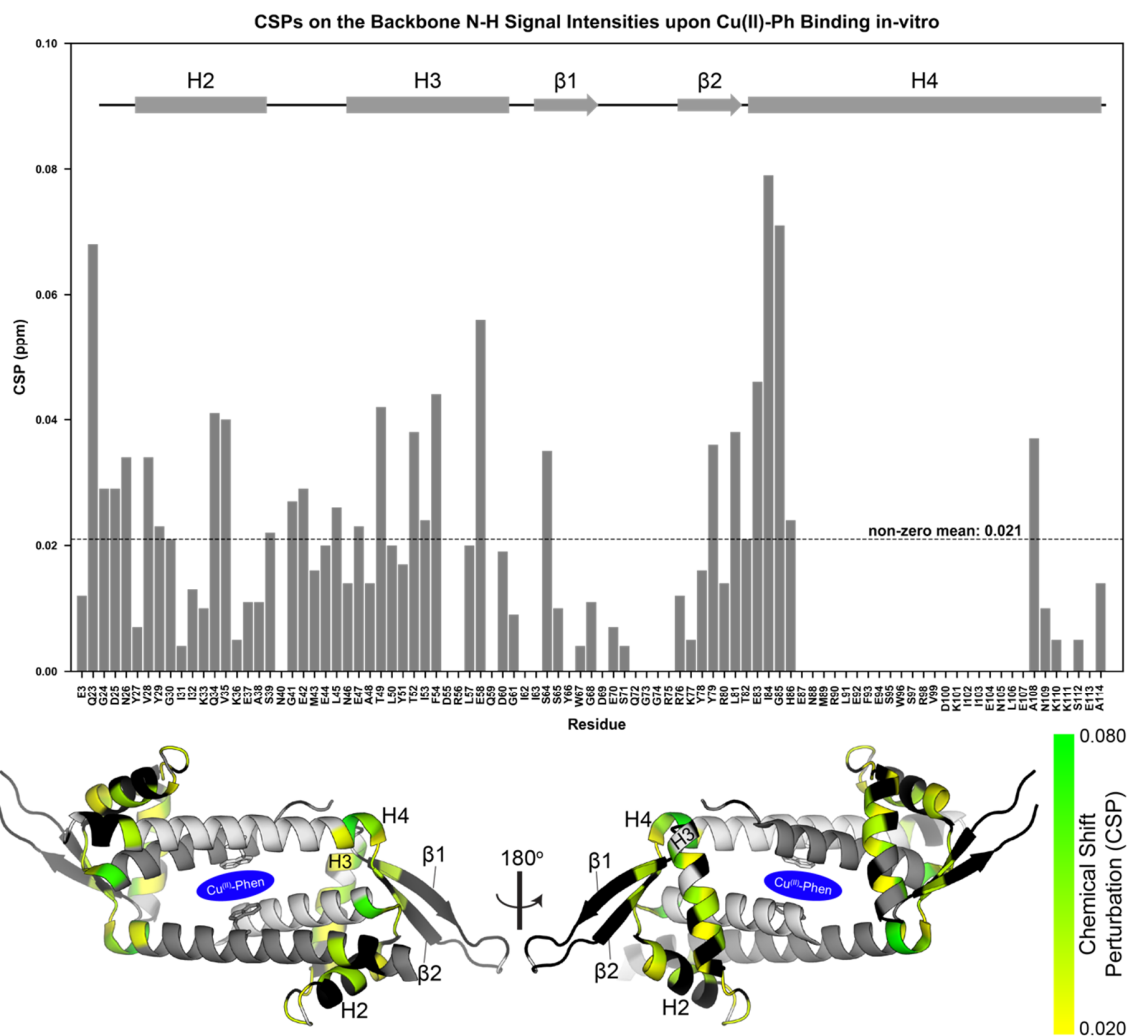

**Figure S14.** CSPs per residue of LmrR due to the binding of Cu(II)-Phen (in solution-state NMR). Residues in black exhibit CSPs of less than 0.02 ppm on the backbone amide. Data are plotted on the crystal structure of LmrR (PDB ID: 3F8F). See Figure S10 for the 2D spectrum.

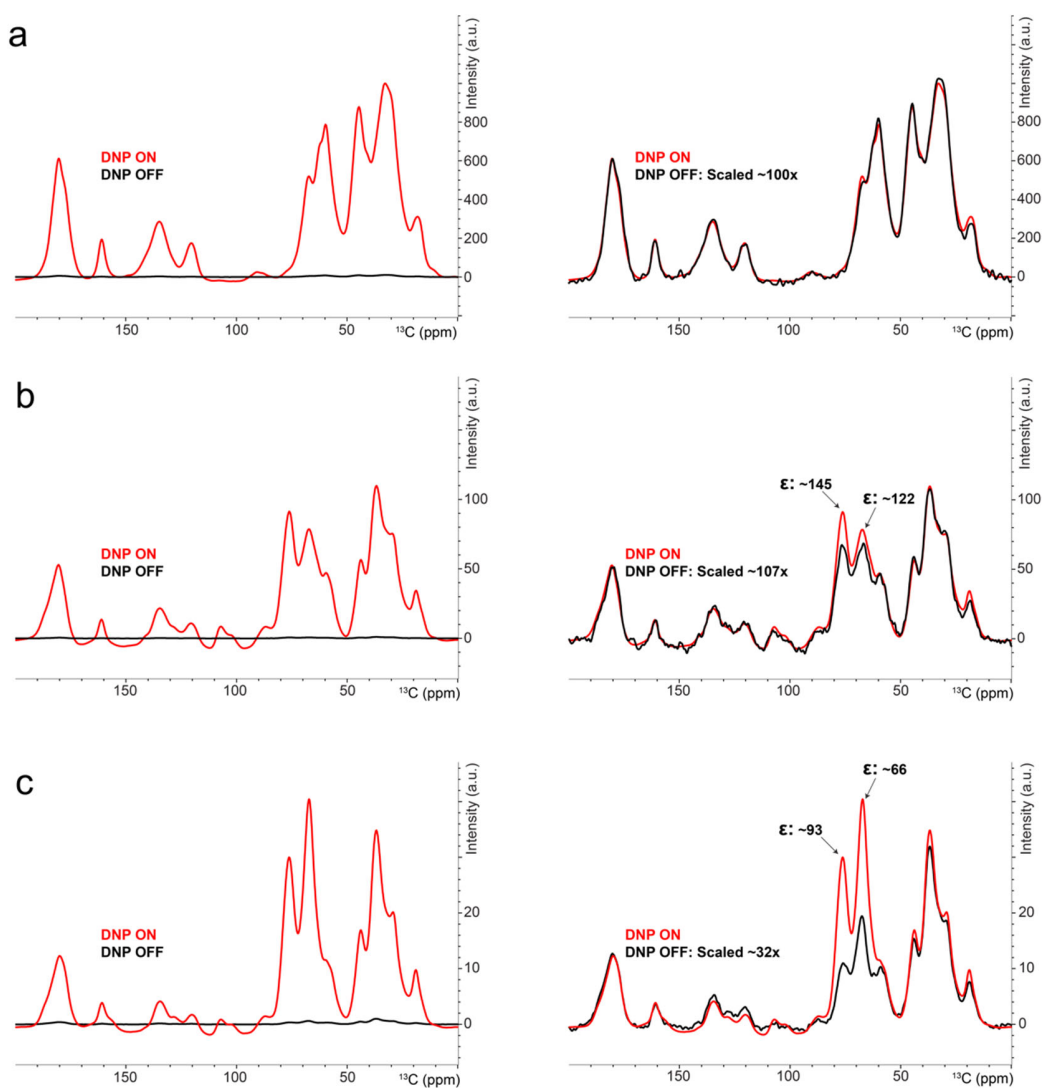

**Figure S15** DNP enhancements, scaled on protein signals in the in-cell DNP samples referred to in the main text. a) Measured on deuterated cells where an algal amino acid mixture was used as the labelling source. b) & c) Measured on deuterated cells where  $^{13}\text{C}$  Glucose and  $^{15}\text{N}$  Ammonium Chloride were used as an isotope labelling source. In addition, when Cu(II)-Phen was introduced to the cells (c), enhancement dropped by a factor  $\sim 3$  on the proteins and a factor  $\sim 2$  on the non-protein background.

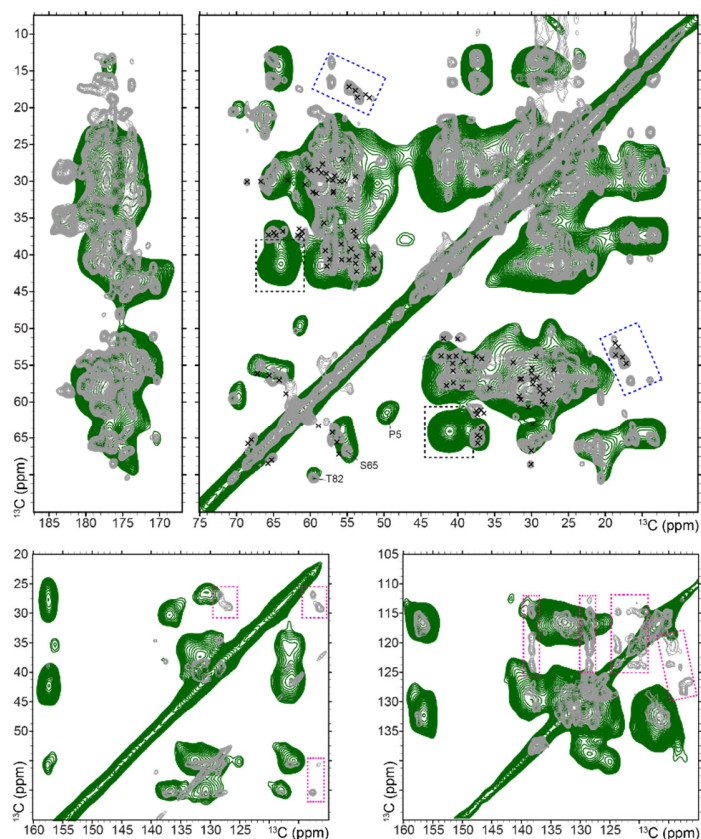

**Figure S16.** 2D  $^{13}\text{C}$ - $^{13}\text{C}$ , proton driven spin-diffusion experiment on LmrR in *E. coli* (green) overlaid with the 2D  $^{13}\text{C}$ - $^{13}\text{C}$  spectrum of microcrystalline LmrR (grey).  $\text{C}_\alpha$ - $\text{C}_\beta$  assignments obtained from solution NMR are superimposed (black crosses). Overall, the spectra are in good overall agreement with each other, and the most resolved peaks are indicated. Trp resonances were missing (red dashed boxes) because the algal mixture does not contain labeled Trp (see Materials and Methods). As often seen in DNP data sets, Ala methyl correlations were strongly reduced due to methyl group rotation at low temperatures (blue dashed boxes). Also, background labelling in the cells is strongly suppressed, except for a correlation marked using black dashed box, corresponding to the head group  $\text{C}_\alpha$ - $\text{C}_\beta$  correlation of phosphatidylethanolamine (PE).<sup>8</sup>

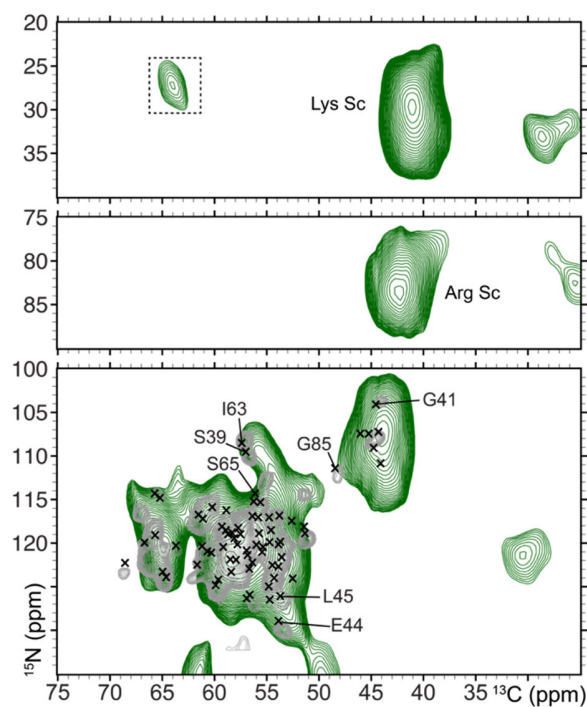

**Figure S17.** 2D aliphatic  $^{15}\text{N}$ - $^{13}\text{C}$  correlation experiment on LmrR in *E. coli* labelled using the  $^{13}\text{C}$ -,  $^{15}\text{N}$ -labelled algae sourced amino acid mixture (green).  $\text{N-C}_\alpha$  assignments obtained from solution NMR are overlaid (black crosses). The overlaid spectrum in grey corresponds to the analogous in-vitro microcrystalline sample (only backbone region shown). The spectra are in good agreement with each other, strongly suggesting that the dominant species of LmrR in cells which is observed in NMR is LmrR that is properly folded. As with Figure S16, background labelling or free isotope labelled amino acids is strongly suppressed with the exception of a correlation that may stem from the lipid head group of phosphatidylethanolamine<sup>8</sup> (PE) marked by a black dashed box.



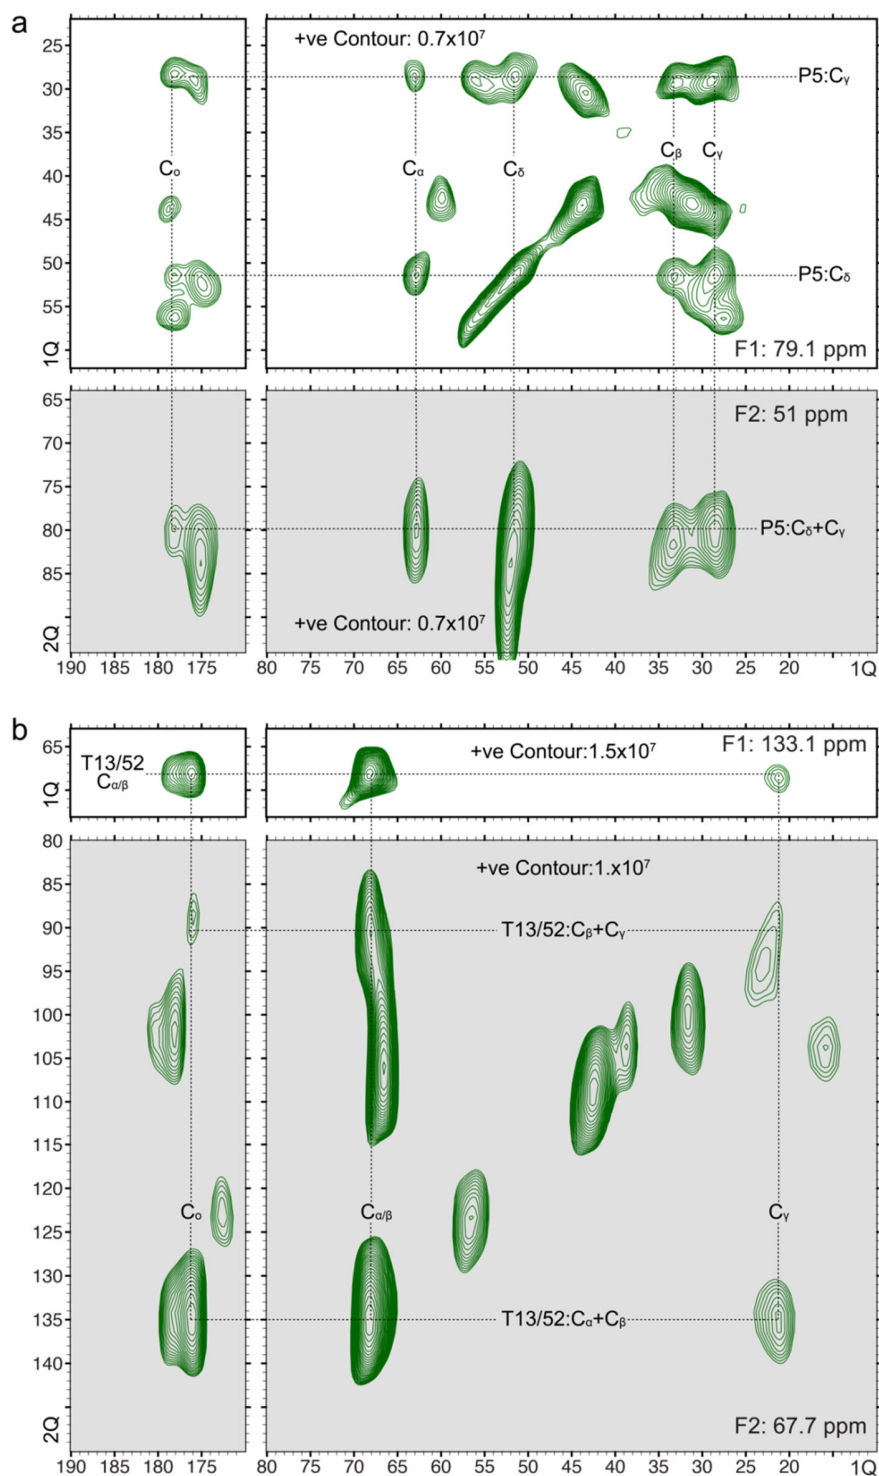

**Figure S18.** Signals in  $F_1$ - $F_3$  dimension (grey background) correlating with signals in the  $F_2$ - $F_3$  dimension (white background) for strips corresponding to P5, & T13/T52 shown in Figure 3b.

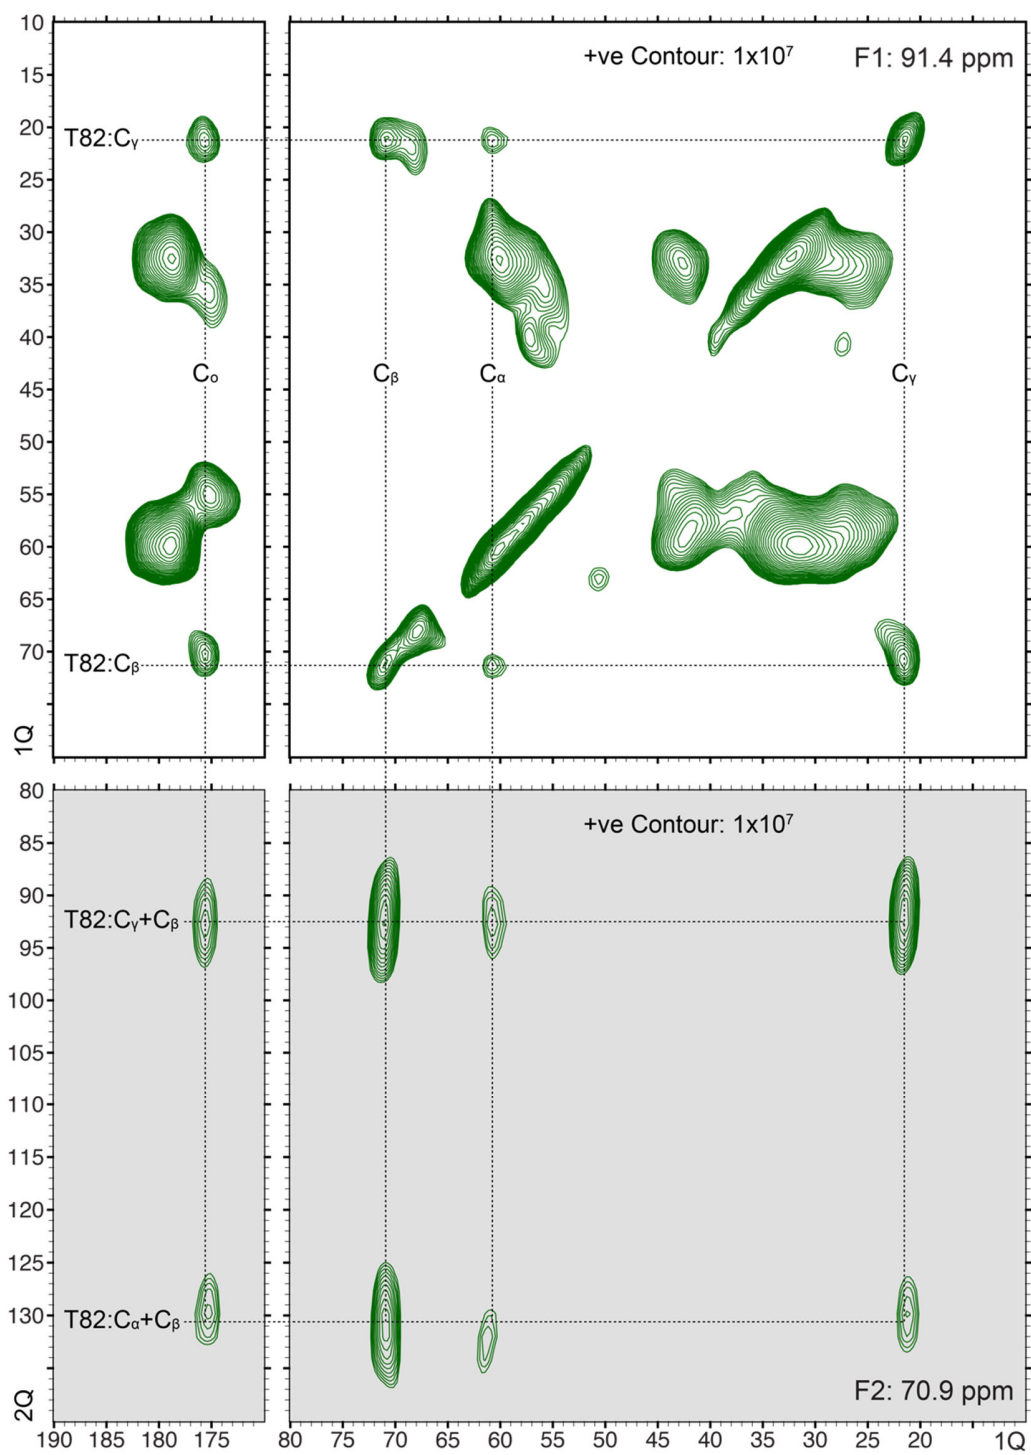

**Figure S19.** Signals in  $F_1$ - $F_3$  dimension (grey background) correlating with signals in the  $F_2$ - $F_3$  dimension (white background) for strips corresponding to T82 shown in Figure 3b.

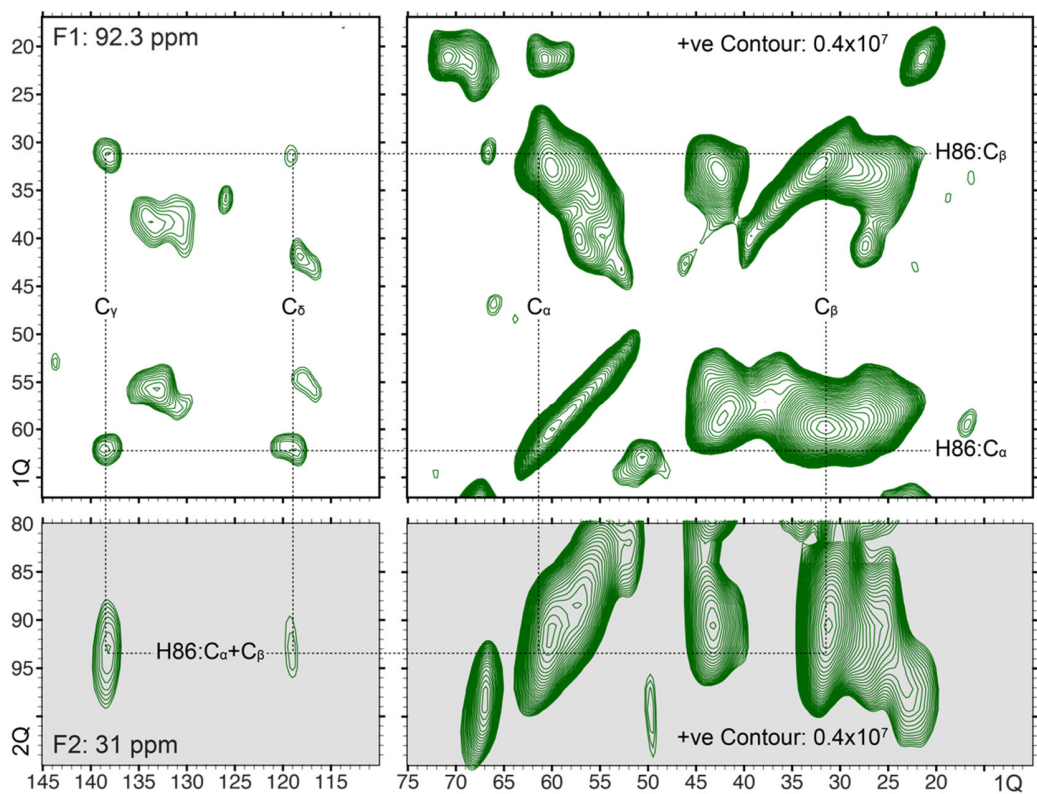

**Figure S20.** Signals in  $F_1$ - $F_3$  dimension (grey background) correlating with signals in the  $F_2$ - $F_3$  dimension (white background) for strips corresponding to H86 shown in Figure 3b.

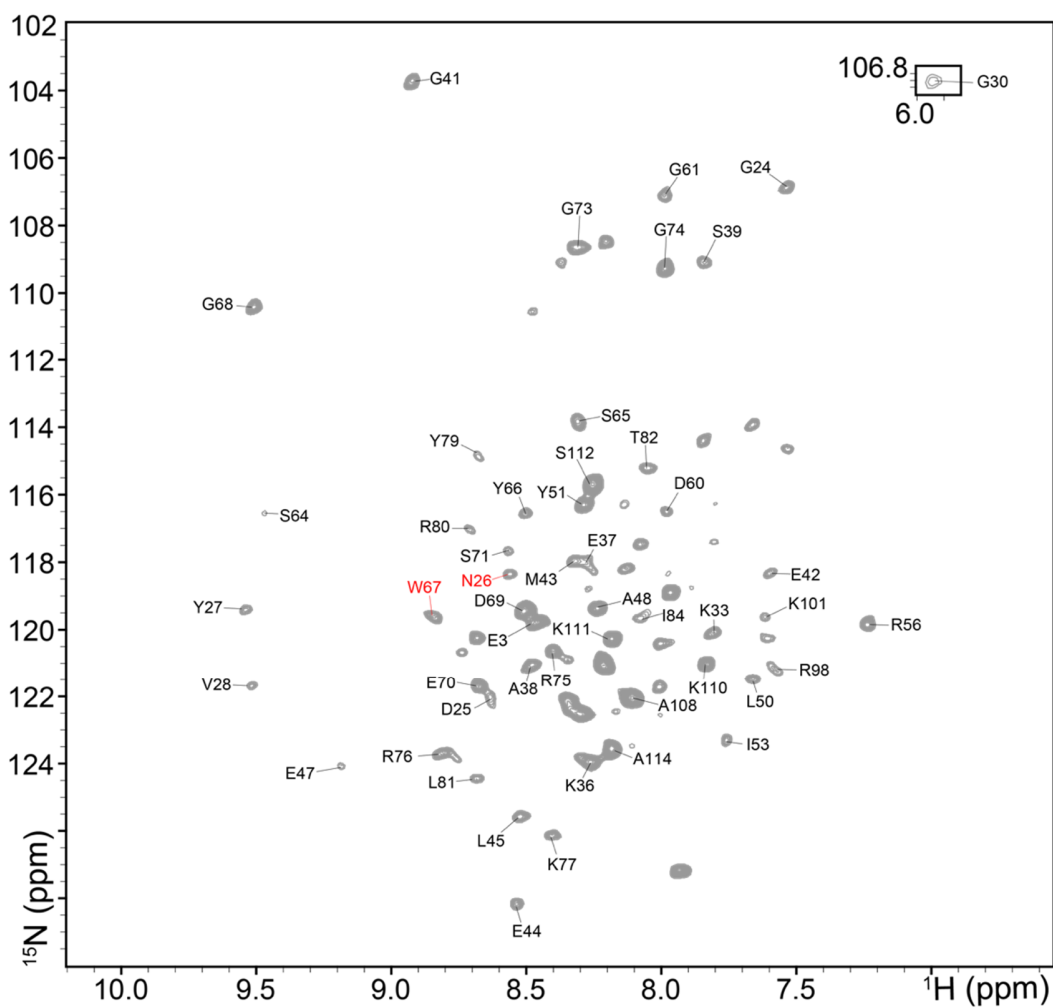

**Figure S21**  $^{15}\text{N}$ - $^1\text{H}$  HSQC Experiment on cell lysates containing LmrR in-vivo labelled using the  $^{13}\text{C}$ -,  $^{15}\text{N}$ -labelled algae sourced amino acid mixture. The lysates were prepared from identical cells used in DNP-ssNMR experiments. All Asn, Gln and Trp resonances except for the W67 and N26 backbone amide are absent. Labelling of W67 and N26 (shown in red) can be attributed to scrambling, in specific transamination reactions from Glu and Asp that have been reported to occur.<sup>9</sup>

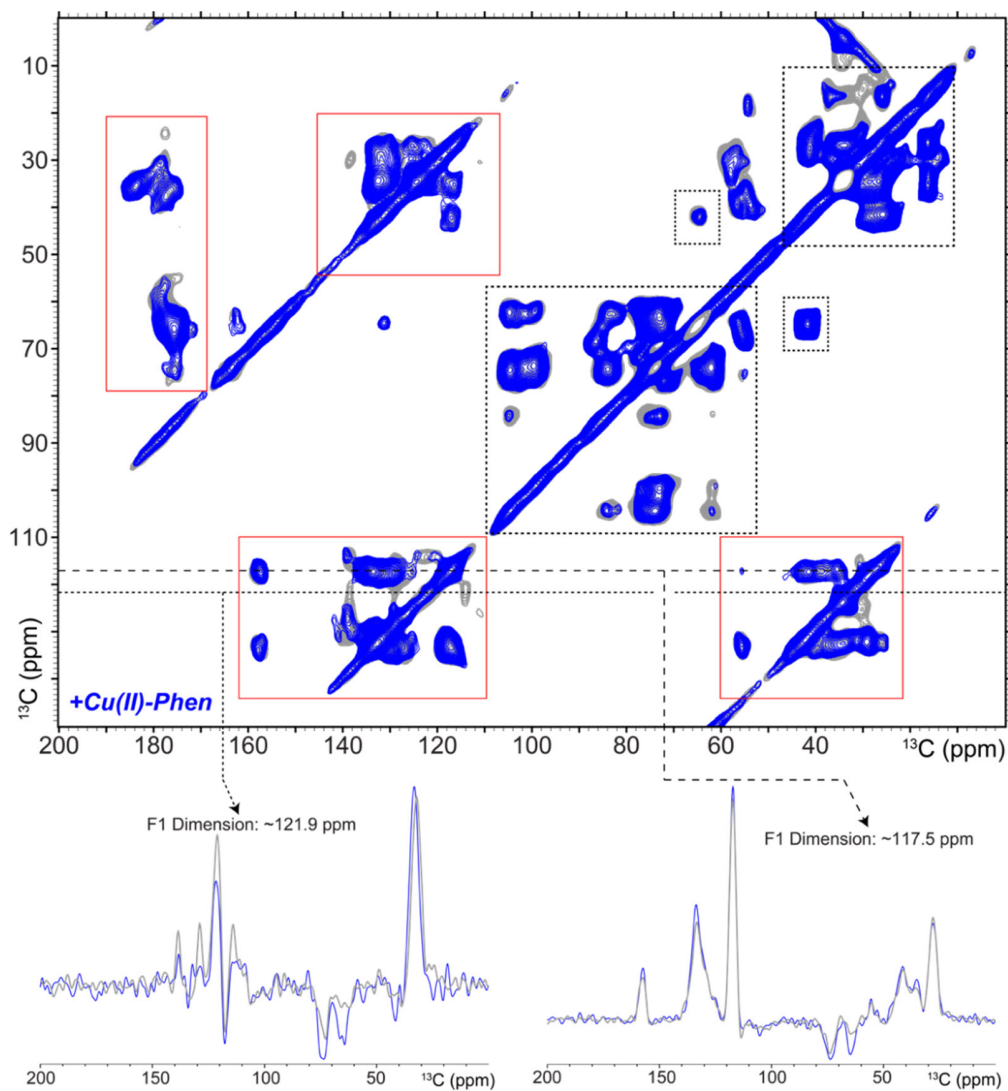

**Figure S22**  $^{13}\text{C}$ - $^{13}\text{C}$  spin diffusion (PDSD) spectra on  $^{13}\text{C}$ ,  $^{15}\text{N}$  labelled LmrR in *E. coli* cells. The aliphatic region was heavily dominated by lipid and sugar resonances (dashed boxes). The aromatic region between 110-160 ppm and the carbonyl region, solely correspond to protein resonances (shown in red boxes). 1D slices from purely Trp aromatic resonances (bottom left) and other aromatic resonances (bottom right) are scaled and show the selective quenching of Trp signal intensities compared to other aromatic residues (see also Figure 3c).

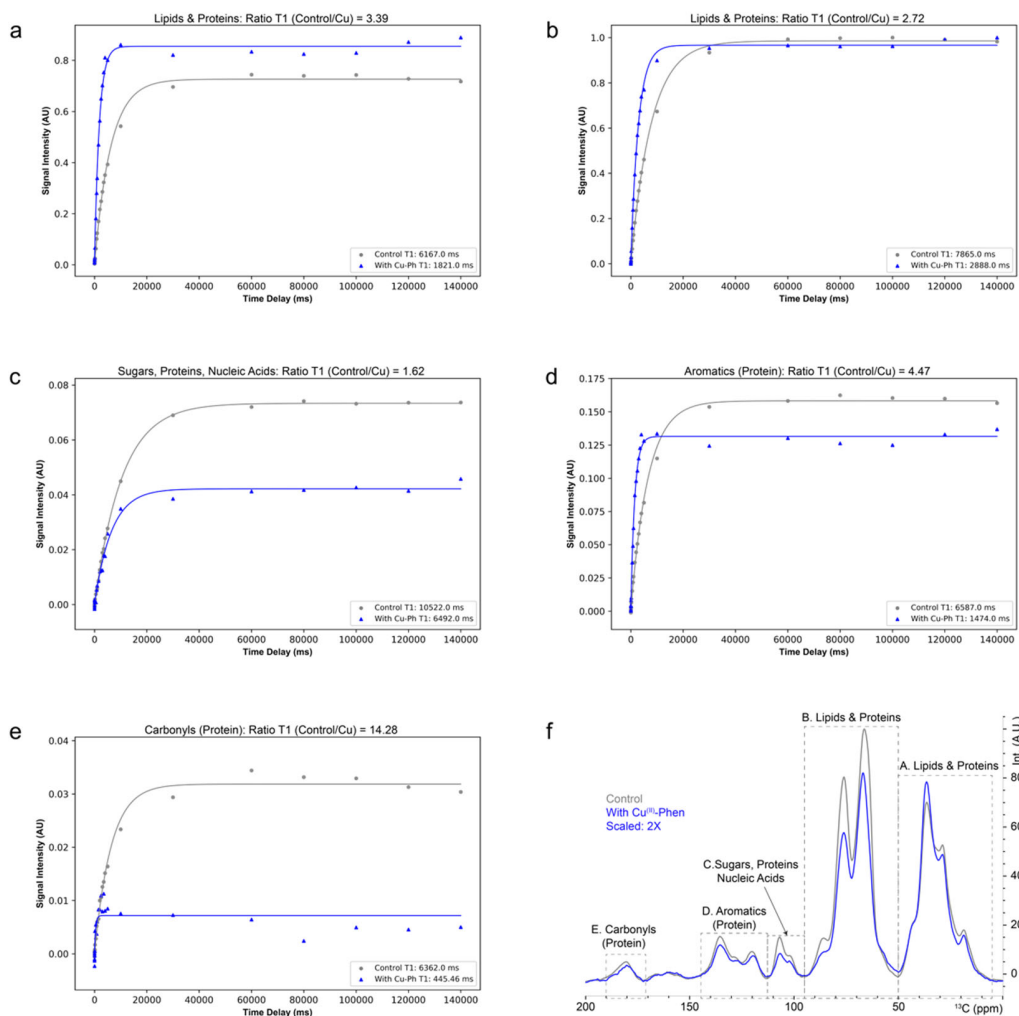

**Figure S23** Relaxation profiles (a-e) of different spectral regions of the cellular samples in a  $^1\text{H}$ - $^{13}\text{C}$  cross-polarized saturation recovery experiment (f), before and after addition of Cu(II)-Phen. In the presence of Cu(II), the relaxation times are fastest in the protein rich signals such as aromatics & carbonyls.

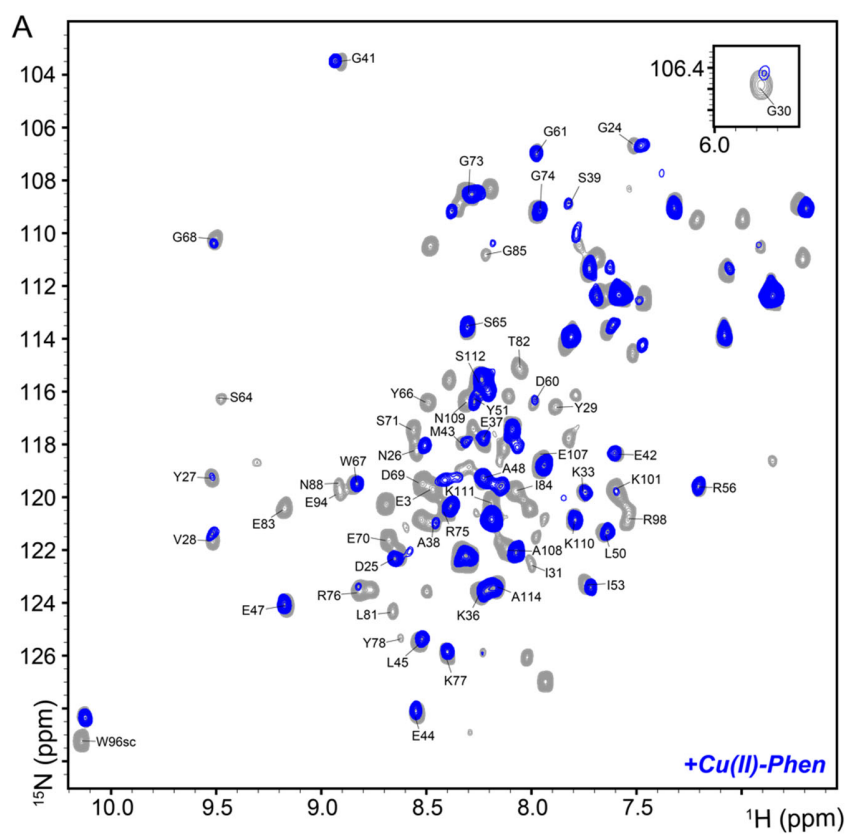

**Figure S24.**  $^{15}\text{N}$ - HSQC spectra of cell lysate containing LmrR with and without Cu(II)-Phen. Note that W96 side chain is a tentative assignment on the basis of strong signal loss after the addition of Cu(II)-Phen, as also seen in the in-vitro spectrum (Figure S10).

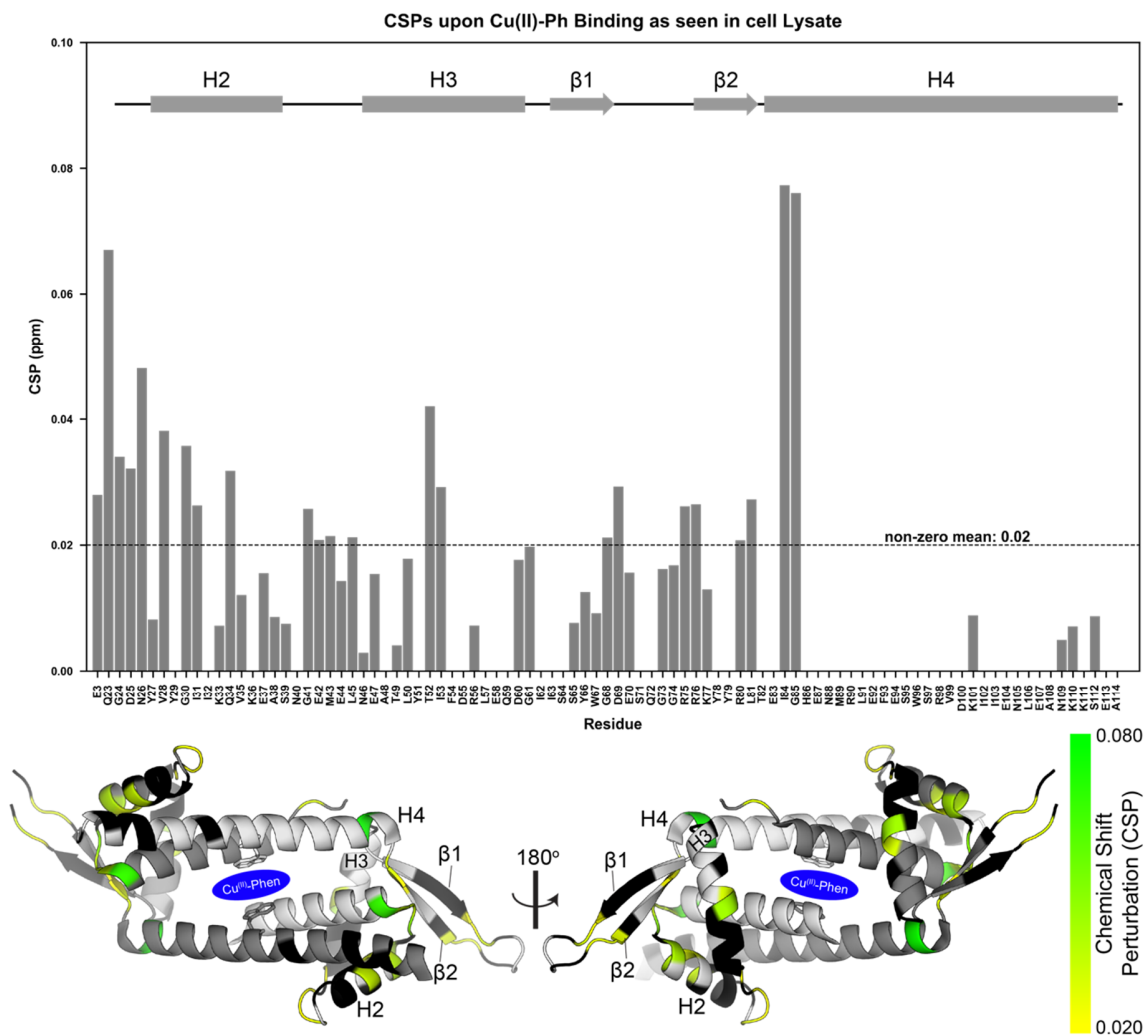

**Figure S25.** CSPs per residue of LmrR due to the Cu(II)-Phen binding in lysates (in solution-state NMR). Residues in black exhibit CSP's of less than 0.02 ppm on the backbone amide. Data are plotted on the crystal structure of LmrR (PDB ID: 3F8F). See Figure S24 for the 2D spectrum.



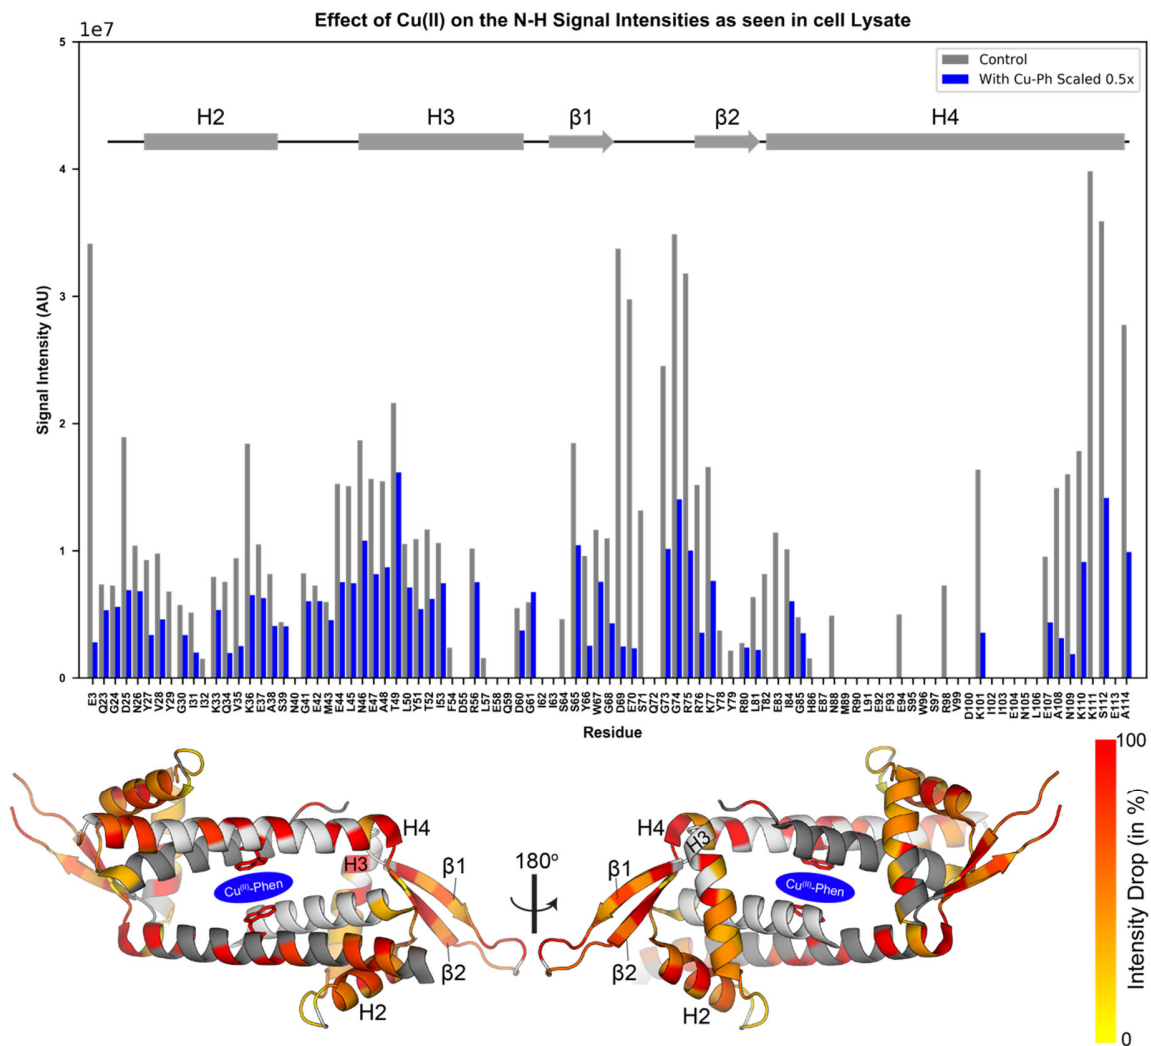

**Figure S26.** Residue-specific drop in NMR signal intensity of the backbone amides in LmrR in cell lysates due to Cu(II)-Phen (in solution-state NMR). Data are plotted on the crystal structure of LmrR (PDB ID: 3F8F). Residues that are not assigned are shown in gray on the structure, except for W96, where we observed complete quenching of the side-chain resonance. See Figure S24 for the 2D spectrum.

## Materials and Methods NMR experiments

### *Expression and purification of isotope labelled LmrR*

*E. coli* Lemo21 cells were transformed with pET17b\_LmrR\_LM\_A92E including a C-terminal Strep-Tag where LM stands for “Lysine mutant”, which is a variant of LmrR with the K55D and K59Q mutations to reduce DNA binding,<sup>6</sup> and A92E mutation that enables stronger binding to Cu(II)-Phen.<sup>10</sup> This variant will be referred to as LmrR in the following, for simplicity. A single colony of the fresh transformant was incubated in LB supplemented with 100 mg/L ampicillin. The culture was scaled up to 50 mL in LB and transferred to 1 L isotope labelled M9 medium when an OD600 of 0.5 was reached. For the samples used for in-vitro ssNMR studies, the M9 medium consisted of <sup>13</sup>C- glucose and <sup>15</sup>N- ammonium chloride. For the samples used to perform in-vitro solution-state NMR experiments we produced perdeuterated proteins using an M9 medium containing D<sub>2</sub>O with <sup>13</sup>C- deuterated (d<sub>7</sub>) glucose and <sup>15</sup>N- ammonium chloride. The cultures were induced at OD600 of 0.8-0.9 using 1 mM IPTG and expression was done overnight at 30°C. Cells were harvested by pelleting and resuspending in the lysis buffer containing 50 mM NaHPO<sub>4</sub> pH 8.0, 150 mM NaCl along with a tablet of EDTA-free protease inhibitor cocktail (Roche).

For purification, the cell suspension was first freeze-thawed and subjected to sonication. Sonication was done 10 times, on ice, using 10-15 s long 13 kHz pulses with a 30 s gap to prevent heating. The lysates were then passed through a 19G syringe multiple times and spun down at 20,000 G for 30 mins. The clear lysate was then loaded on to a 5 ml Strep-Tactin Superflow cartridge pre-equilibrated with the lysis/ wash buffer- 50 mM NaHPO<sub>4</sub> pH 8.0, 150 mM NaCl. The column was washed with the wash buffer until no protein was seen in the UV-Vis output. The protein was eluted using 5 mM desthiobiotin in 50 mM NaHPO<sub>4</sub> pH 8.0, 150 mM NaCl. Prior to any subsequent experiments, the protein was buffer exchanged in 20 mM MOPS pH 7.0 with 150 mM NaCl by dialysis and gel filtration was performed using a Superdex 75pg column. Concentration of the yield was determined using a Nanodrop by measuring the absorbance at 280 nm ( $\epsilon_{280} = 25440 \text{ M}^{-1} \text{ cm}^{-1}$ ).

### *Assembling the metalloenzyme in-vitro*

DMSO stocks of 100-120 mM Cu(II)-Phen (synthesized using an approach reported previously)<sup>1</sup> was freshly prepared. To assemble the metalloenzyme, a 1:10 molar ratio of LmrR:Cu(II)-Phen mixture was prepared and incubated for an hour at room temperature. The excess Cu(II)-Phen was subsequently washed away using multiple steps of concentrating and diluting in 20 mM MOPS pH 7.0 with 150 mM NaCl to 10 times the original volume using 15,000 Da centrifugal filters.

### ***Protein precipitation for in-vitro ssNMR studies***

Upto 20 mL of 0.5-1.5 mg/mL LmrR (with/ without Cu(II)-Phen) was added to an equal volume of 50% w/v Polyethylene Glycol (PEG) 2000 Monomethyl Ether (MME) prepared in 20 mM MOPS pH 7.0 with 150 mM NaCl. After overnight incubation (16-18 hours) at 4°C, the microcrystalline LmrR (precipitated) was spun down, resuspended in 1 mL of fresh 25% PEG 2000 MME in 20 mM MOPS pH 7.0 with 150 mM NaCl and spun into 3.2 mm zirconia rotors for ssNMR experiments at ambient temperatures.

### ***Targeted labelling of LmrR in E. coli cells with background deuteration***

A single colony of freshly transformed *E. coli* Lemo21(DE3) cells harboring the plasmid containing LmrR was isolated and grown in an overnight LB culture with 100 mg/L ampicillin. 50 µL of the overnight culture was incubated in 50 mL of LB and grown up to OD600 of 0.05. The cells were then switched to an equal volume (50 mL) of unlabelled M9 medium prepared in D<sub>2</sub>O using deuterated d<sub>7</sub> D- glucose and grown to an OD600 of 1.0. Expression was induced by adding 1 mM IPTG (final concentration) and the culture was incubated at 30°C for 30 minutes. The cells were then moved to an 18°C incubator and incubated for 5 mins to cool them down. Subsequently, 100 mg/L rifampicin (from a 1000x DMSO stock) was added and the flasks were incubated for another 15 mins. 500 mg/L of <sup>13</sup>C-, <sup>15</sup>N- labelled algal amino acid mixture (devoid of N, Q, C & W amino acids) was then added to the culture medium to achieve protein selective labelling. Alternatively, for the sample preparations that required labelling of Tryptophan (W), the cells were switched to precooled (18°C) fully labelled M9 medium prepared in D<sub>2</sub>O (supplemented with 100 mg/L rifampicin, 2 g/L of <sup>13</sup>C-D-glucose and 0.5 g/L of <sup>15</sup>NH<sub>4</sub>Cl). After 16h of expression at 18°C, the cells were switched to a precooled, unlabelled and deuterated M9 medium containing a reduced concentration of rifampicin (50 mg/L) for 4h. The final step involved transferring the cells to unlabelled and deuterated M9 medium devoid of rifampicin for the last 2h of expression. The rifampicin concentration was thus gradually reduced, to remove bulk rifampicin from the cells which might otherwise interfere with Cu(II)-Phen.

### ***Cu(II)-Phen incubation in cells for DNP-ssNMR***

After expression, the 50 mL culture was spun down and resuspended in 10 mL of precooled (4°C) 20 mM MOPS pH 7.0 with 150 mM NaCl prepared in D<sub>2</sub>O with 10 µL of Cu(II)-Phen stock (350 mM in deuterated d<sub>6</sub> DMSO). 10 µL DMSO was used instead of a Cu(II)-Phen stock solution for the control samples. The incubation was carried out for 2h at 4°C. The cells were then pelleted, washed twice using ice cold 20 mM MOPS pH 7.0 with 150 mM NaCl prepared in D<sub>2</sub>O. Half the pellet was frozen for solution state NMR analysis of lysates and the other half was resuspended in 50 µL of deuterated DNP juice (60% deuterated d<sub>8</sub>- and <sup>12</sup>C enriched glycerol, in D<sub>2</sub>O) comprising of 15 mM AMUPol<sup>11</sup> in 20 mM MOPS pH 7.0 with 150 mM NaCl. Washing buffers were prepared in D<sub>2</sub>O, to prevent back-exchange of deuterated amide protons, thereby maximizing cell deuteration.

### ***Lysates for solution-state NMR***

The other half of the harvested cell pellet, which was frozen during DNP sample preparation, was thawed on ice. This was followed by the addition of ice-cold buffer of 20 mM MOPS pH 7.0 with 150 mM NaCl prepared in 10% D<sub>2</sub>O. Subsequently, cells were resuspended and sonicated on ice at 13 kHz with 10-15 s long pulses with a gap of 30 s to avoid excessive heating. After sonication, the cell debris was passed through a 19G syringe multiple times and finally spun down at 20,000 G for 30 mins. The pellet was discarded, and the clear lysate was spun down for another 30 mins to remove insoluble components.

### ***DNP solid-state NMR experiments***

DNP ssNMR experiments were conducted under low temperature (100 K) DNP conditions using a 3.2 mm triple-resonance (<sup>1</sup>H, <sup>13</sup>C, and <sup>15</sup>N) magic-angle-spinning (MAS) probe head in a static magnetic field of 9.4 T, corresponding to proton/electron resonance frequencies of 400 MHz/263 GHz. All spectra were recorded at a MAS rate of 9 kHz using SPINAL-64 proton decoupling<sup>12</sup> at an r.f. field strength of 84 kHz.

### ***Solid-state NMR experiments on in-vitro LmrR***

We conducted in-vitro solid-state NMR experiments using a 3.2 mm triple-resonance (<sup>1</sup>H, <sup>13</sup>C, and <sup>15</sup>N) E-free flip-angle MAS probe head in a static magnetic field of 16.4 T, corresponding to a proton frequency of 700 MHz. The set temperature was 253K and all spectra were recorded at a MAS rate of 13 kHz using a 77 kHz SPINAL-64 proton decoupling.<sup>12</sup>

### **1D- $^1\text{H}$ - $^{13}\text{C}$ Cross-Polarization experiments**

The 1D H-C (CP) spectra were recorded using a 2 s recycle delay and 10 ms acquisition time. Cross-polarization was achieved using contact times of 300-800  $\mu\text{s}$  for in-vitro ssNMR experiments and 900-1200  $\mu\text{s}$  for DNP-ssNMR experiments. 100 Hz line-broadening was applied prior to Fourier transformation.

### **2D- Proton-driven spin diffusion (PDS) experiments in cells (DNP)**

For experiments using cells labelled with the algal amino acid mixture, a H-C CP contact time of 1.2 ms and a mixing time of 30 ms was used. Acquisition times were 15 ms (760 points used- 405.3 ppm spectral width) and 3.5 ms (200 data points- 280 ppm spectral width) for direct and indirect dimensions respectively. FIDs from three different experiments with 192, 64 & 64 scans were added.

For all the other cellular samples, the following experimental conditions were employed. A short H-C CP contact time of 100  $\mu\text{s}$  was used to avoid excitation of background lipids/ sugars. In addition, a mixing time of 60 ms was employed. Acquisition times were set to 15 ms (600 data points used- 405.3 ppm spectral width) and 2.8 ms (160 data points- 280 ppm spectral width) for the direct and indirect dimensions, respectively. 128 scans were recorded.

All in-cell spindiffusion spectra were processed using a  $0.25\pi$  shifted sine squared window function on both dimensions.

### **2D- $^{13}\text{C}$ - $^{13}\text{C}$ PARIS experiments for microcrystalline LmrR**

A 300  $\mu\text{s}$  contact time was used for H-C CP, followed by PARIS<sup>13</sup> recoupling for a mixing time of 30 ms using a  $^1\text{H}$  radio frequency amplitude of 7 kHz. Acquisition times were set to 10 ms (1302 points used- 354.98 ppm spectral width) and 5.4 ms (380 data points- 200 ppm spectral width) for direct and indirect dimensions respectively. 64 scans were recorded and a  $0.33\pi$  shifted sine squared window function was applied on both dimensions.

### **Calculating $T_1$ relaxation times**

$T_1$  relaxation rates for  $^1\text{H}$  were calculated from the data obtained from a  $^1\text{H}$ - $^{13}\text{C}$  CP Saturation-Recovery experiment. 100 Hz line-broadening was applied prior to Fourier transformation of the series of 1D spectra. Peaks were manually selected and integrated, and the  $T_1$  relaxation tool in TOPSPIN 4.0.7 was used to estimate the  $T_1$  relaxation rates.

### **2D- $^{15}\text{N}$ - $^{13}\text{C}$ correlation experiments**

Conventional ssNMR on samples prepared in-vitro involved the following experimental parameters. A  $^1\text{H}$ - $^{15}\text{N}$  CP step of 1.1 ms and a SPECIFIC-CP<sup>14</sup>  $^{15}\text{N}$ - $^{13}\text{C}$  transfer time of 1.5 ms were employed. On-resonance frequencies were set to 115 ppm and 56 ppm for  $^{15}\text{N}$  and  $^{13}\text{C}$  dimensions, respectively to select for N- $\text{C}_\alpha$  transfer. A recycle delay of 2 s was used, and 512 scans were acquired. Acquisition times were set to 10 ms (800 data points used- 338 ppm spectral width) and 9.2 ms (42 data points- 32 ppm spectral width) for the direct and indirect dimensions, respectively. In addition, linear forward prediction using 4 points and 4 coefficients were employed in the indirect dimension. The 2D spectra were processed using a  $0.33\pi$  shifted sine squared window function on both dimensions.

For DNP-ssNMR experiment on cells labelled with the algal amino acid mixture, the following experimental conditions were used. A  $^1\text{H}$ - $^{15}\text{N}$  CP step of 800  $\mu\text{s}$  and a SPECIFIC-CP<sup>15</sup>  $^{15}\text{N}$ - $^{13}\text{C}$  transfer time of 2 ms were employed. On-resonance frequencies were set to 75 ppm and 40 ppm for  $^{15}\text{N}$  and  $^{13}\text{C}$  dimensions, respectively. A recycle delay of 2 s was used, and 256 scans were acquired. Acquisition times were set to 10 ms (512 data points used- 497 ppm spectral width) and 2.5 ms (36 data points- 180 ppm spectral width) for the direct and indirect dimensions, respectively. Linear forward prediction using 8 points and 8 coefficients was applied in the indirect dimension. The 2D spectra were processed using a  $0.25\pi$  shifted sine squared window function on both dimensions.

### **3D- $^{13}\text{C}$ DQ-SQ-SQ correlation experiment**

The  $^{13}\text{C}$  3D 2Q-1Q-1Q correlation spectrum, was obtained using 10 blocks of SPC5<sup>15</sup> mixing (2.5 ms) for generation and subsequent reconversion of double quantum coherences. A contact time of 300  $\mu\text{s}$  was used for H-C cross polarization and continuous wave (CW)  $^1\text{H}$  decoupling was applied during the SPC5 sequence with a field strength of 85 kHz. Acquisition times were 10 ms (460 data points used- 307 ppm spectral width) in the  $F_3$  1Q direct dimension, 2.7 ms (100 data points- 185 ppm spectral width) in the  $F_2$  1Q indirect dimension and 0.9 ms (50 data points- 280 ppm spectral width) for the  $F_1$  2Q indirect dimension. 64 scans were acquired. The spectrum was processed using a  $0.28\pi$  shifted sine squared window function in the direct dimension and a  $0.25\pi$  shifted sine squared window function in the two indirect dimensions.

### **Solution-state NMR experiments**

We conducted solution-state NMR experiments at ambient temperatures (293-298 K) using triple channel ( $^1\text{H}$ ,  $^{13}\text{C}$ , and  $^{15}\text{N}$ ) probes. A static magnetic field of 21.1 T corresponding to a proton frequency of

900 MHz, with cryogenic probe was used to record 2D spectra. A static magnetic field of 17.6 T corresponding to a proton frequency of 750 MHz was used to record 3D experiments serving to obtain backbone assignments. We acquired 3D HNCA & HNCACB (TROSY) spectra of perdeuterated LmrR. We used the spectral assignments for  $^{15}\text{N}$  and amide  $^1\text{H}$  for wild type LmrR<sup>16,17</sup> to assign the  $^{13}\text{C}$  chemical shifts in our spectra. The  $^{15}\text{N}$ - $^1\text{H}$  chemical shifts were kindly provided to us by the Shimada group (University of Tokyo).

For the 2D in-vitro  $^{15}\text{N}$  TROSY experiments, a total of 32 and 64 scans were recorded for control and Cu(II)-Phen treated samples respectively with a recycle delay of 0.3 s. On-resonance frequencies were set to 8.2 and 118.508 ppm for  $^1\text{H}$  and  $^{15}\text{N}$  respectively. Acquisition times were set to 80 ms (1024 data points used- 14 ppm spectral width) and 70 ms (512 data points used- 40 ppm spectral width) in the indirect and direct dimensions respectively. The 2D spectra were processed using a cosine squared window function on both dimensions.

For the 2D  $^{15}\text{N}$  HSQC experiments, 32 scans were recorded in lysate samples, with a recycle delay of 1 s. On-resonance frequencies were set to 4.714 and 118.508 ppm for  $^1\text{H}$  and  $^{15}\text{N}$  respectively. Acquisition times were set to 71 ms (800 data points used- 16 ppm spectral width) and 20 ms (128 data points used- 35 ppm spectral width) in the indirect and direct dimensions respectively. The 2D spectra were processed using  $0.33\pi$  shifted sine squared window function on both dimensions.

### ***Spectral visualization and analysis***

All 2D and 3D spectra were processed using TOPSPIN 4.0.7 except the solution-state NMR 3D spectra used for assignments (Tables S9-10), which was processed using NMRPipe<sup>18</sup>. Spectra were visualized and analyzed using the NMRFAM-SPARKY<sup>19</sup> software, and the peaks pertaining to every experiment was generated using FANDAS 2.0<sup>20</sup> software package. Weighted chemical shift perturbations (CSPs) were calculated using the following formula:

$$CSP = \sqrt{(\Delta\delta_N/6.51)^2 + \Delta\delta_H^2}$$

where  $\Delta\delta_N$  and  $\Delta\delta_H$  are the differences in  $^{15}\text{N}$  and  $^1\text{H}$  chemical shifts, respectively.

## 10. Directed Evolution

### *Site-saturation mutagenesis of LmrR*

LmrR\_A92E was selected as the starting point for the directed evolution study. We employed the simplified NDT codon degeneracy to make libraries that explore a diverse array of 12 amino acids at 6 positions individually.<sup>21</sup> Randomization was introduced by application of the Quikchange Site Directed Mutagenesis Protocol (Agilent Technologies) using degenerate oligos described in (Table S7). The pooled plasmid DNA or PCR product was checked by Sanger Sequencing and a Q value was calculated.<sup>22</sup> The library was considered of good quality if the Q value was greater than 0.7 (see Table S11). To get about 95 % library coverage we analyzed 35 single colonies from each library.

**Table S11 Site-saturation mutagenesis library quality**

| Number | Position | Degeneracy | Q (> 0.70)        |
|--------|----------|------------|-------------------|
| 1      | 8        | NDT        | 0.71 <sup>1</sup> |
| 2      | 14       | NDT        | 0.72 <sup>2</sup> |
| 3      | 88       | NDT        | 0.74 <sup>1</sup> |
| 4      | 89       | NDT        | 0.88 <sup>1</sup> |
| 5      | 93       | NDT        | 0.86 <sup>2</sup> |
| 6      | 100      | NDT        | 0.83 <sup>2</sup> |

<sup>1</sup> DNA sequencing of PCR product. <sup>2</sup> DNA sequencing of pooled plasmid DNA.

### *Culturing and protein expression in well plates*

The 35 single colonies picked from each library, freshly transformed single colonies of LmrR\_A92E (positive control) and LmrR\_W96A (negative control) were cultivated overnight in a 96-well plate (sealed with a sealing film) containing 1500  $\mu$ L of LB media and 100  $\mu$ g/mL ampicillin at 37 °C, 1050 rpm. The next morning, 100  $\mu$ L of the overnight culture was transferred to 24-well plates containing 4900  $\mu$ L of LB media and 100  $\mu$ g/mL ampicillin and incubated at 37 °C, 1050 rpm. After 4.5 h of growth, 50  $\mu$ L of 1 mM IPTG was added to induce protein production and the cells were cultured at 30 °C, 1050 rpm overnight.

### *In vivo catalysis in well plates*

The overnight induced cell cultures over-expressing LmrR variants (2 mL, OD<sub>600nm</sub> = 4) were transferred to a 96-well reaction plate (sealed with a sealing film), washed with catalysis buffer and re-suspended in catalysis buffer containing 360  $\mu$ M Cu(II)-Phen. The cells are incubated in a plate shaker (4 °C, 1050 rpm, 1 h). The cells are then again washed (to remove unbound copper complex) and re-suspended in catalysis



buffer. The substrates **1** and **2b** were added to a concentration of 1 mM and the reaction plate was kept in a plate shaker (4 °C, 1050 rpm, 24 h).

### **Extraction and HPLC**

Internal standard, 2-phenylquinoline, was added to determine yield and ee values. The crude product was isolated by liquid-liquid extraction using diethyl ether (3 x 0.4 mL) in a 96-well plate using a manual multi-channel pipette. The organic phase was dried over Na<sub>2</sub>SO<sub>4</sub> and filtered using a 96-well filter plate. The dried organic phase was evaporated under reduced pressure. The crude product was re-suspended in HPLC solvent and analyzed by chiral separation on np-HPLC to determine yield and ee.

### **Reliability of enantioselectivity based enzyme screening**

**Table S12: Reproducibility of catalysis data for various mutants screened from a single plate**

| <b>F-C Alkylation of 1 and 2b to yield product 3b. Cell suspension 500 μL and OD<sub>600nm</sub>=4, Cu(II)-Phen 90 μM, reaction time 24 h.</b> |                  |               |                  |               |                  |               |
|------------------------------------------------------------------------------------------------------------------------------------------------|------------------|---------------|------------------|---------------|------------------|---------------|
| <b>Replicate no.</b>                                                                                                                           | <b>LmrR_W96A</b> |               | <b>LmrR</b>      |               | <b>LmrR_A92E</b> |               |
|                                                                                                                                                | <b>yield (%)</b> | <b>ee (%)</b> | <b>yield (%)</b> | <b>ee (%)</b> | <b>yield (%)</b> | <b>ee (%)</b> |
| 1                                                                                                                                              | 1                | 6             | 5                | 64            | 17               | 85            |
| 2                                                                                                                                              | 1                | 7             | 4                | 73            | 14               | 80            |
| 3                                                                                                                                              | 1                | 6             | 3                | 74            | 16               | 86            |
| 4                                                                                                                                              | 1                | 5             | 4                | 74            | 15               | 85            |
| 5                                                                                                                                              | 2                | 8             | 5                | 58            | 15               | 86            |
| 6                                                                                                                                              | 1                | 13            | 4                | 71            | 16               | 86            |
|                                                                                                                                                | 1±0              | 8±2           | 4±1              | 69±5          | 16±0             | 85±2          |
| <b>F-C Alkylation of 1 and 2b to yield product 3b. Cell suspension 2 mL and OD<sub>600nm</sub>=4, Cu(II)-Phen 360 μM, reaction time 24 h.</b>  |                  |               |                  |               |                  |               |
| <b>Replicate no.</b>                                                                                                                           | <b>LmrR_W96A</b> |               | <b>LmrR</b>      |               | <b>LmrR_A92E</b> |               |
|                                                                                                                                                | <b>yield (%)</b> | <b>ee (%)</b> | <b>yield (%)</b> | <b>ee (%)</b> | <b>yield (%)</b> | <b>ee (%)</b> |
| 1                                                                                                                                              | 1                | 19            | 11               | 76            | 34               | 86            |
| 2                                                                                                                                              | 5                | 16            | 13               | 69            | 28               | 83            |
| 3                                                                                                                                              | 3                | 18            | 12               | 77            | 25               | 85            |
|                                                                                                                                                | 3±1              | 18±1          | 12±1             | 74±3          | 29±4             | 85±1          |

The value of yield (%) and ee (%) is reproducible between replicates for various mutants of LmrR screened from a single plate.

**Table S13. Reproducibility of positive and negative controls across all the *in vivo* screening experiments**

|                          | LmrR_W96A<br>(Negative control) |        | LmrR_A92E<br>(Positive control/Parent enzyme) |        |
|--------------------------|---------------------------------|--------|-----------------------------------------------|--------|
|                          | Yield of 3b (%)                 | ee (%) | yield of 3b (%)                               | ee (%) |
| <b>Average</b>           | 6                               | 13     | 32                                            | 79     |
| <b>SD</b>                | 4                               | 6      | 9                                             | 7      |
| <b>CV %<sup>23</sup></b> | 65                              | 47     | 28                                            | 8      |

The trends in yield and ee values for the controls are reproducible throughout the screening assays. The catalysis data for the negative control are noisy as expected because of the low yields. The catalysis data for positive control/parent enzyme are reproducible across all the samples and reaction plates screened. The screening assay is therefore reliable to find a mutant that performs better than the positive control/parent enzyme.

#### ***Selecting clones from *in vivo* screening of libraries***

Representative procedure (M8NDT library). 34 single colonies from this library were screened. Enantioselectivity was used as selection criterion. The top three colonies whose ee values were higher than the parent enzyme (LmrR\_A92E) were selected. It was checked if these mutant containing cells gave a yield of at least 50 % as much as the cells expressing the parent enzyme (LmrR\_A92E) on the same reaction plate. Thus, from the screening of the library M8NDT (See Table S12) LmrR\_A92E\_M8S, LmrR\_A92E\_M8D and LmrR\_A92E\_M8Y were selected for *in vitro* catalysis. The colonies that matched the selection criteria were sequenced, cultured on a larger scale, the protein variant was purified and *in vitro* catalysis performed to check yield and ee values.

**Table S14. Comparing in vivo and in vitro activity of clones that match selection criteria from plate screening**

| Plate 1                |                                   |      |                                         |      |
|------------------------|-----------------------------------|------|-----------------------------------------|------|
| Protein variant        | Whole cell catalysis <sup>1</sup> |      | Purified protein catalysis <sup>2</sup> |      |
|                        | Yield %                           | ee%  | Yield %                                 | ee%  |
| LmrR_A92E              | 32±1                              | 80±0 | 11±1                                    | 91±1 |
| LmrR_A92E_M8D          | 26±4                              | 85±0 | 23±1                                    | 93±2 |
| LmrR_A92E_M8S          | 24±1                              | 86±0 | 17±0                                    | 92±1 |
| LmrR_A92E_M8Y          | 24±1                              | 85±0 | 17±0                                    | 93±0 |
| Plate 2                |                                   |      |                                         |      |
| LmrR_A92E              | 39±3                              | 86±0 | 11±1                                    | 91±1 |
| LmrR_A92E_M8A          | 41±2                              | 90±0 | 20±0                                    | 94±0 |
| Plate 3                |                                   |      |                                         |      |
| LmrR_A92E              | 36±8                              | 78±0 | 11±1                                    | 91±1 |
| LmrR_A92E_N14I         | 56±19                             | 79±2 | 12±1                                    | 88±1 |
| LmrR_A92E_N14V (CFU 1) | 73±16                             | 81±2 | 15±0                                    | 87±2 |
| LmrR_A92E_N14V (CFU 2) | 75±5                              | 78±1 |                                         |      |
| Plate 4                |                                   |      |                                         |      |
| LmrR_A92E              | 44±3                              | 86±0 | 11±1                                    | 91±1 |
| LmrR_A92E_N14A         | 42±9                              | 87±0 | 17±2                                    | 90±1 |
| LmrR_A92E_M89N (CFU 1) | 55±1                              | 84±0 | 7±1                                     | 85±2 |
| LmrR_A92E_M89N (CFU 2) | 60±1                              | 84±0 |                                         |      |
| Plate 5                |                                   |      |                                         |      |
| LmrR_A92E              | 37±3                              | 82±0 | 11±1                                    | 91±1 |
| LmrR_A92E_N88D         | 63±5                              | 83±0 | 16±2                                    | 90±1 |
| LmrR_A92E_N88G         | 49±7                              | 82±0 | 13±0                                    | 89±1 |
| LmrR_A92E_N88I         | 33±0                              | 86±0 | 15±1                                    | 87±2 |

F-C Alkylation of 1 and 3. <sup>1</sup>Cell suspension 2 mL and OD<sub>600nm</sub>=4, Cu(II)-Phen 360 μM, reaction time 24 h.

<sup>2</sup>Protein 12 μM, Cu(II)-Phen 9 μM, reaction time 6 h.

Most mutants that show increased yield *in vitro* correspond to increased enantioselectivity observed during *in vivo* screening. There is no corresponding trend with increased yield observed during *in vivo* screening. Thus, this justifies and confirms the use of enantioselectivity as the reliable parameter for the screening assay.

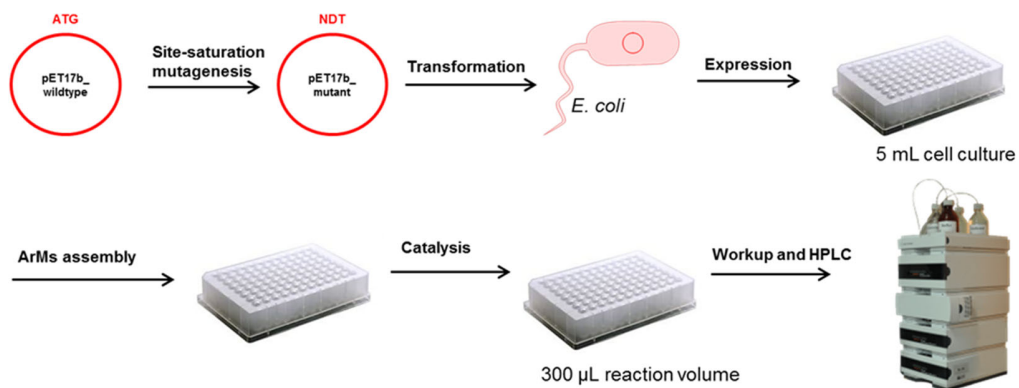

Figure S27. Directed Evolution workflow

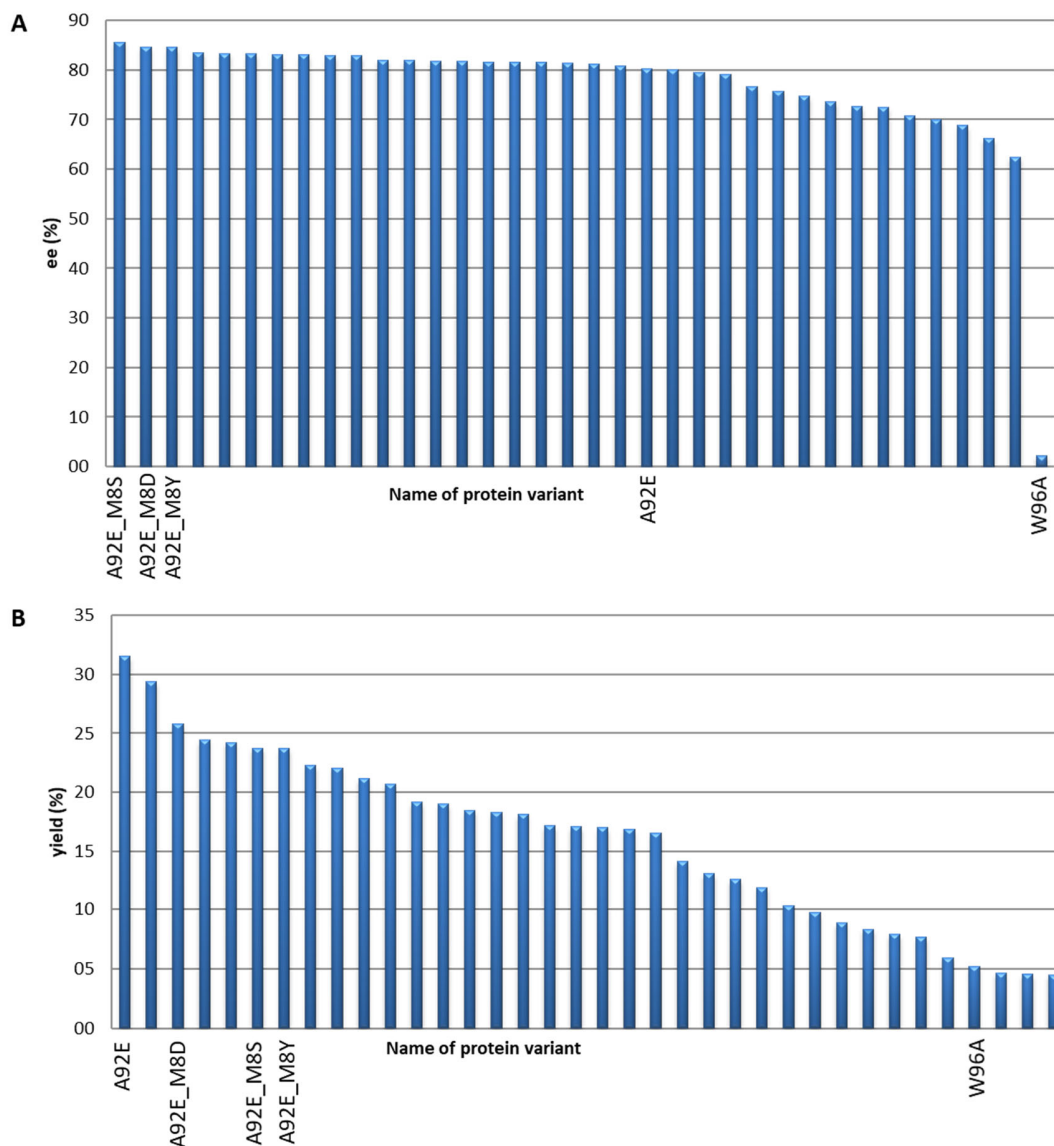

**Figure S28.** HPLC based screening of NDT library on position M8 A) Comparing ee % of product **3b** for the different colonies tested. B) Comparing yield % product **3b** for the different colonies tested.

## 11. Kinetic Studies

A solution of purified protein variants of LmrR (6.7  $\mu\text{M}$ ) was mixed with Cu(II)-Phen (5  $\mu\text{M}$ ) in a 2 mL HPLC vial. After 30 min the substrates **1** and **2b** were added and the vial loaded into the sample tray of a rp-HPLC, maintained at 4  $^{\circ}\text{C}$ . A sample was injected every 30 min onto a Chiralpak AD column, protected by a guard column from possible precipitation in samples. The product separated from the reaction mixture on the HPLC column and the yield was calculated. For the kinetics assay we could not go higher than 5 mM final substrate concentration due to solubility issues. Since substrate saturation was not reached and the  $V_{\text{obs}}$  was still in the linear part of the Michaelis-Menten curve ( $S \ll K_M$ ), only the  $k_{\text{cat}}/K_M$  values could be calculated by the following equation  $V_{\text{obs}}/[E] = K_{\text{cat}}/K_M * [S]$ .

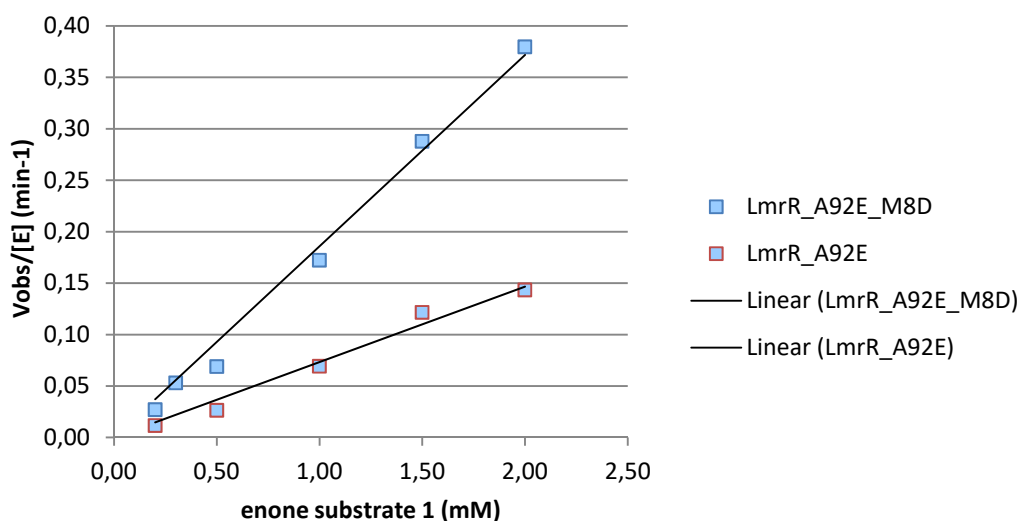

**Figure S29.** Kinetics of ArM catalyzed Friedel-Crafts alkylation reaction of **1** with **2b**.

## 12. SDS-PAGE gels of the LmrR mutants after Strep-Tag purification

LmrR\_N14A

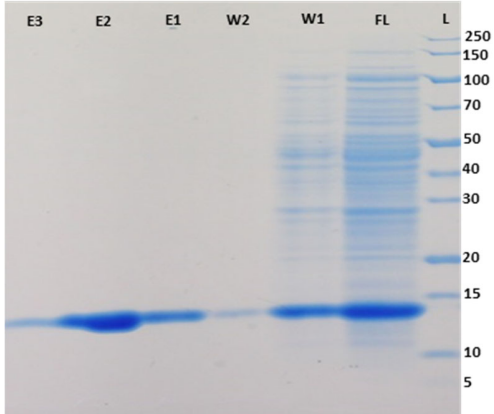

LmrR\_N88A

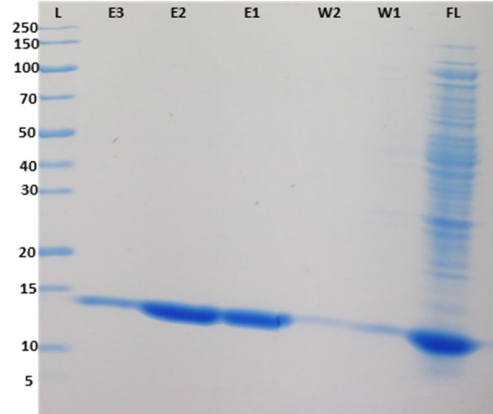

LmrR\_M89A

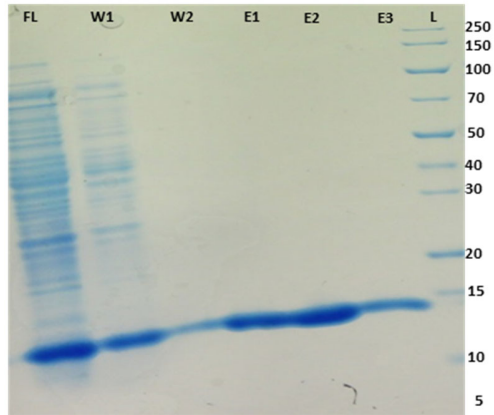

LmrR\_R10A

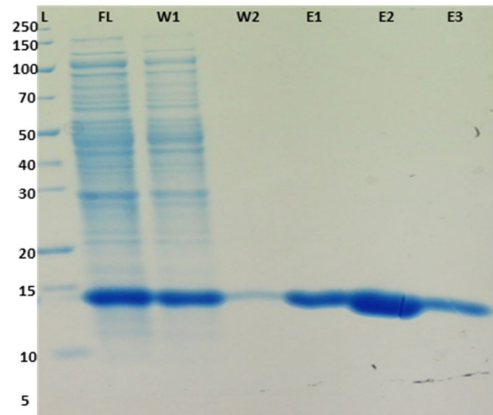

LmrR\_S95A

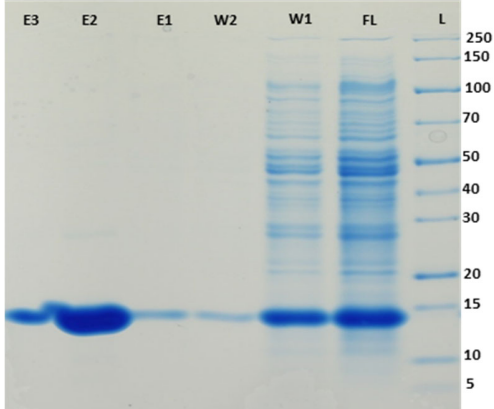

LmrR\_L18A

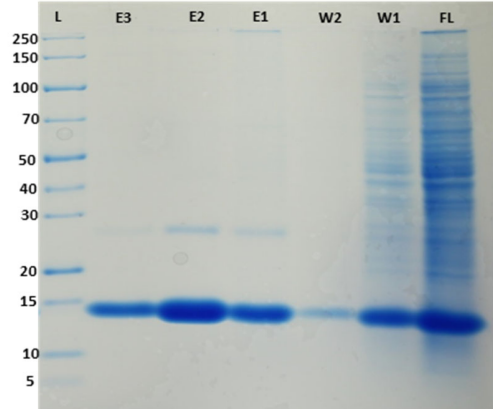

LmrR\_S97A

LmrR\_A92E\_M8D

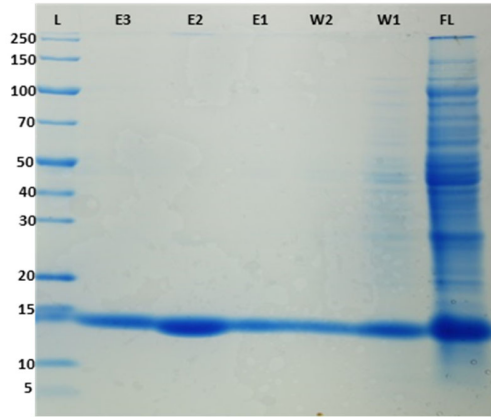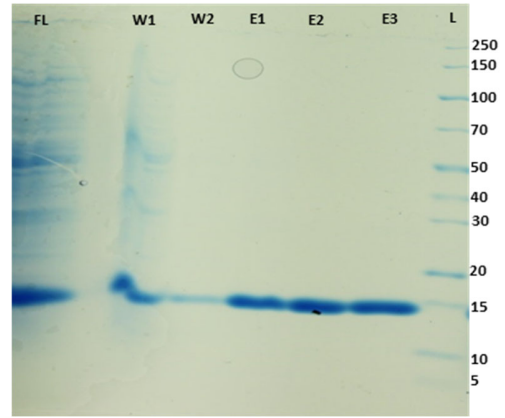

LmrR\_A92E\_M8S

LmrR\_A92E\_M8Y

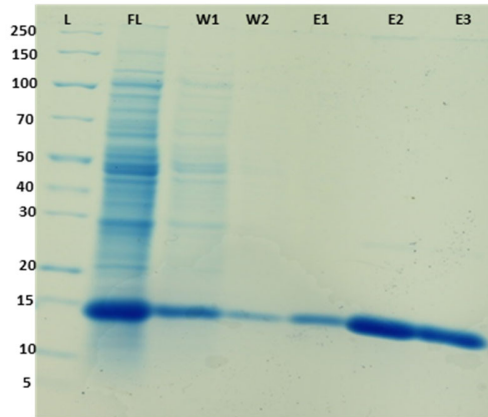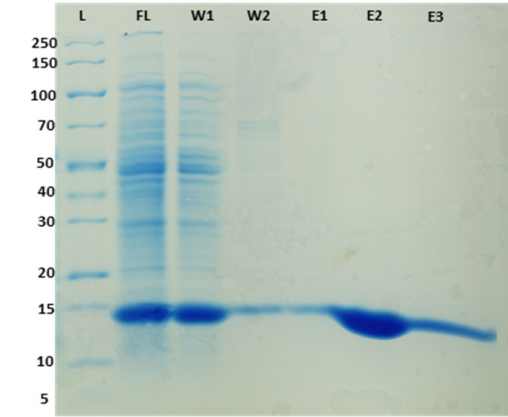

LmrR\_A92E\_M8A

LmrR\_A92E\_N14A

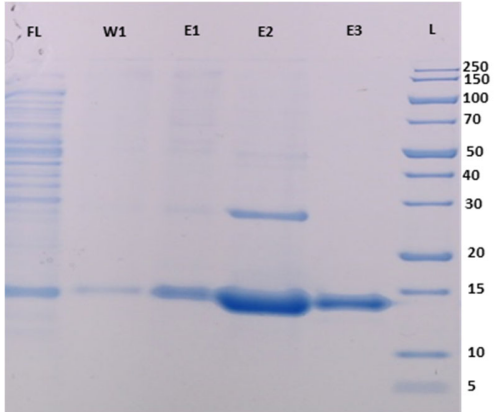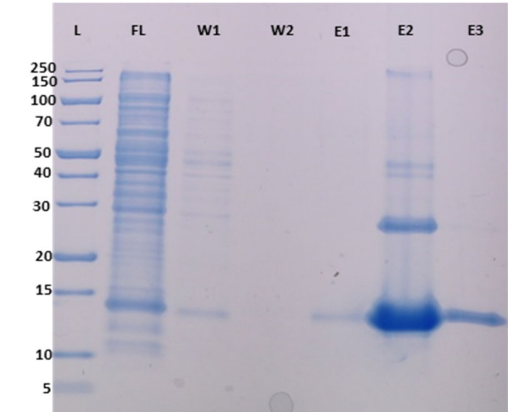



LmrR\_A92E\_N88D

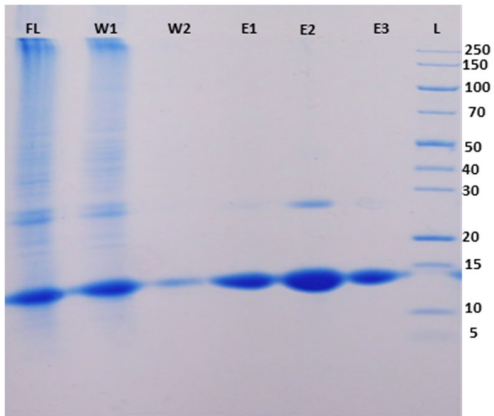

LmrR\_A92E\_N88G

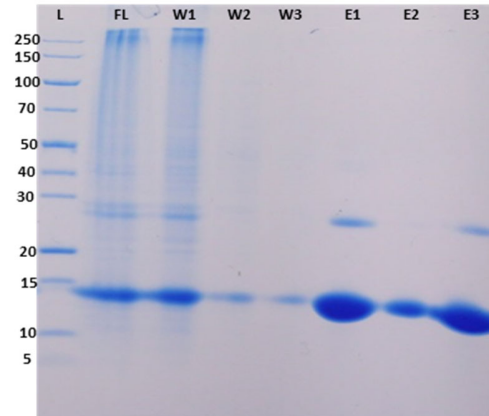

LmrR\_A92E\_N14I

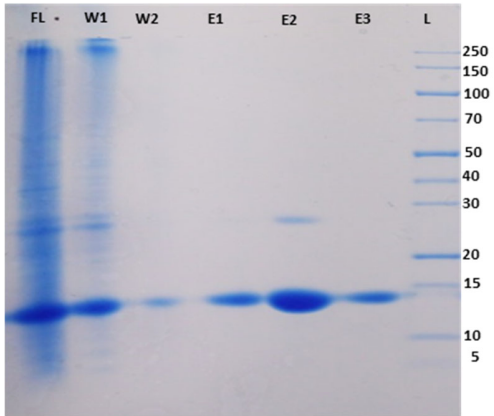

LmrR\_A92E\_N14V

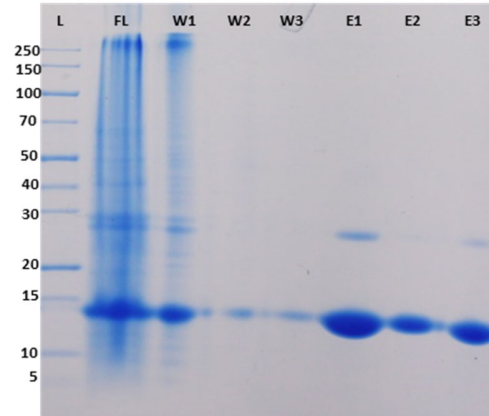

LmrR\_A92E\_N88I

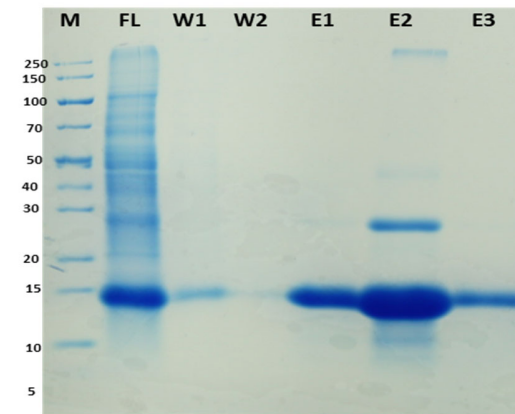

LmrR\_A92E\_M89N

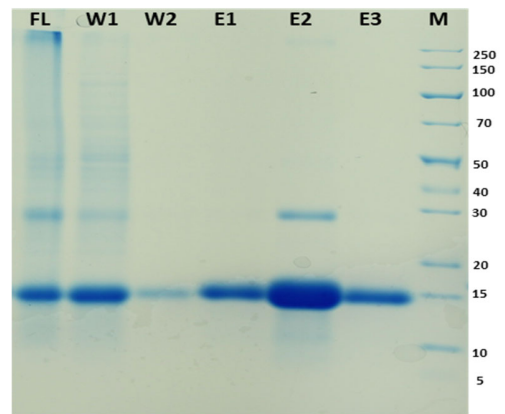

LmrR\_A92E\_V15A

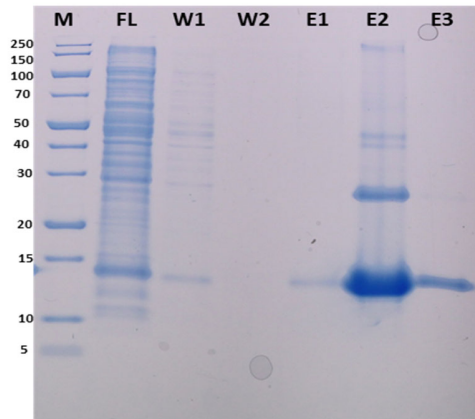

**Legend:** L- Ladder (PageRuler™ Unstained Broad Range, mol wt 5 to 250kDa). FL – Flow-through column.

W - Wash fraction. E - Elution fraction. Gels were stained with InstantBlue™ (Expedeon).

### 13. Mass spectra

LmrR\_R10A calculated mass (-Met) 14885.7

NL=2.51e+008 TIC=4.85e+009 S/N=1545

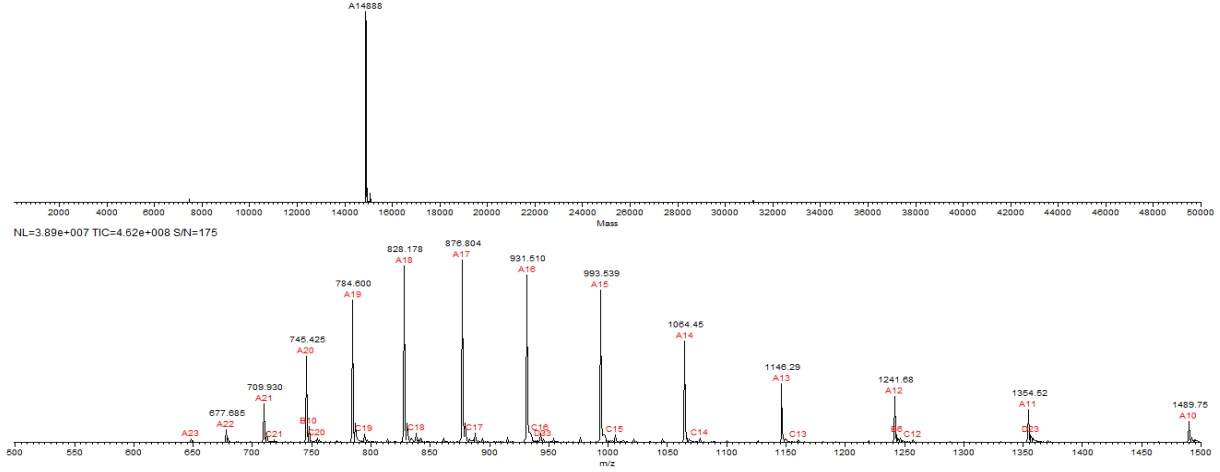

LmrR\_N14A calculated mass (-Met) 14927.7

NL=1.30e+008 TIC=4.30e+009 S/N=1028

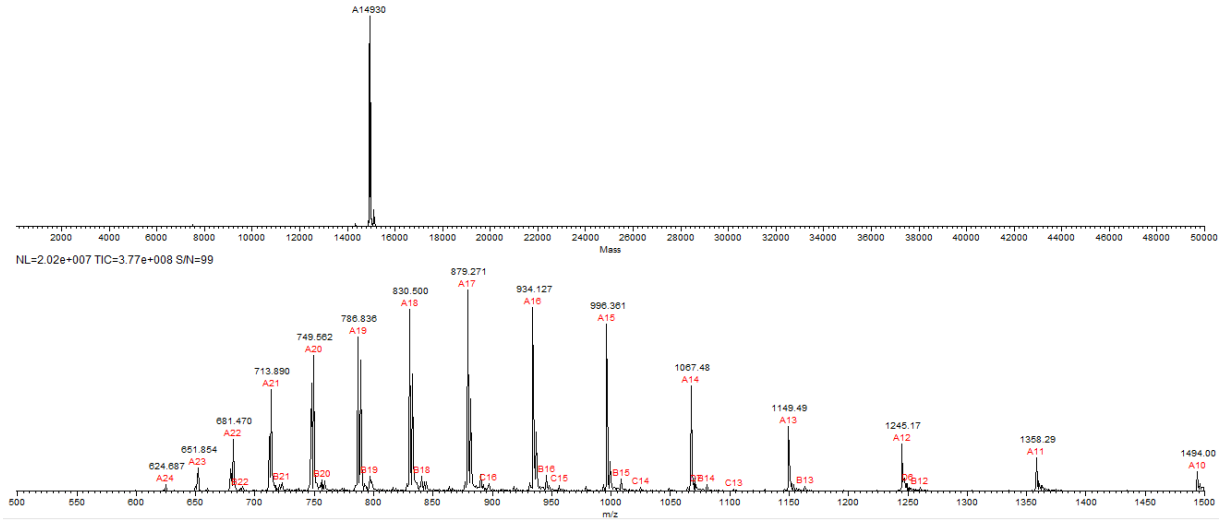

### LmrR\_L18A calculated mass (-Met) 14928.7

NL=2.10e+008 TIC=5.67e+009 S/N=1580

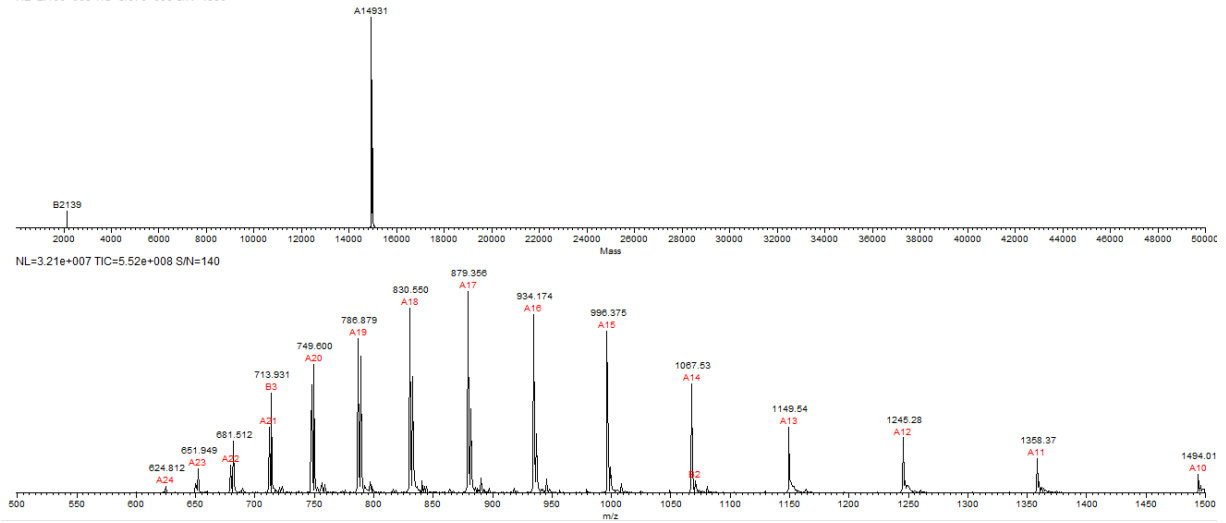

### LmrR\_N88A calculated mass (-Met) 14927.7

NL=2.14e+008 TIC=6.63e+009 S/N=1135

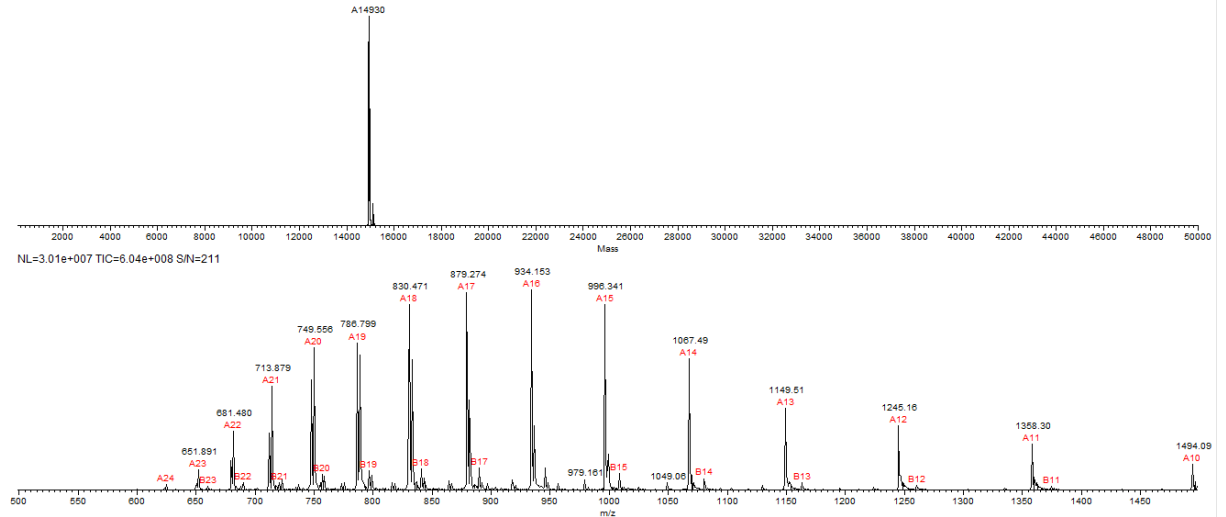

### LmrR\_M89A calculated mass (-Met) 14910.7

NL=1.93e+008 TIC=6.05e+009 S/N=1226

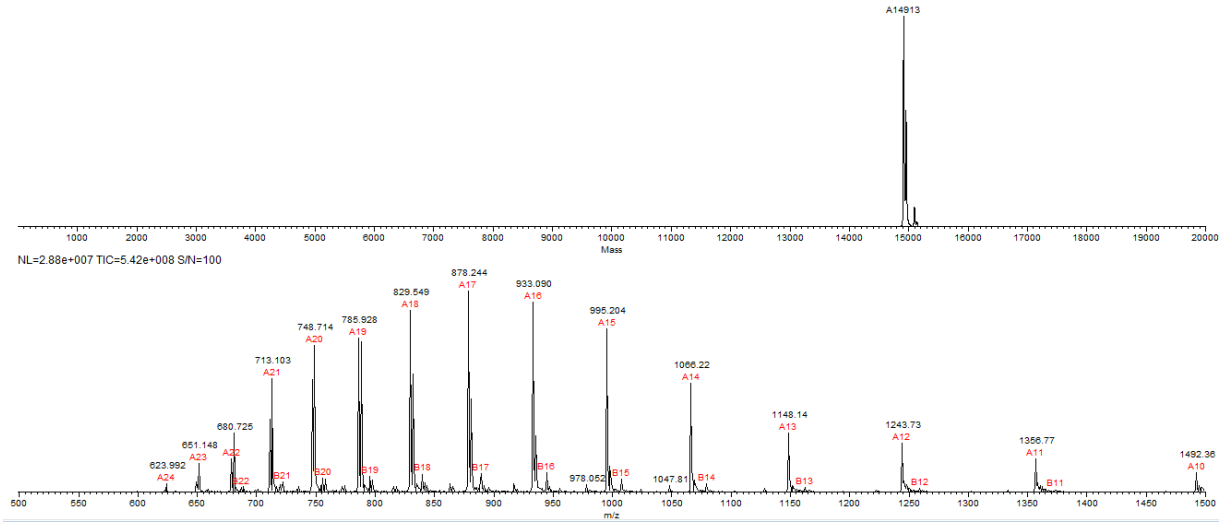

### LmrR\_S95A calculated mass (-Met) 14954.8

NL=1.83e+005 TIC=5.00e+006 S/N=71

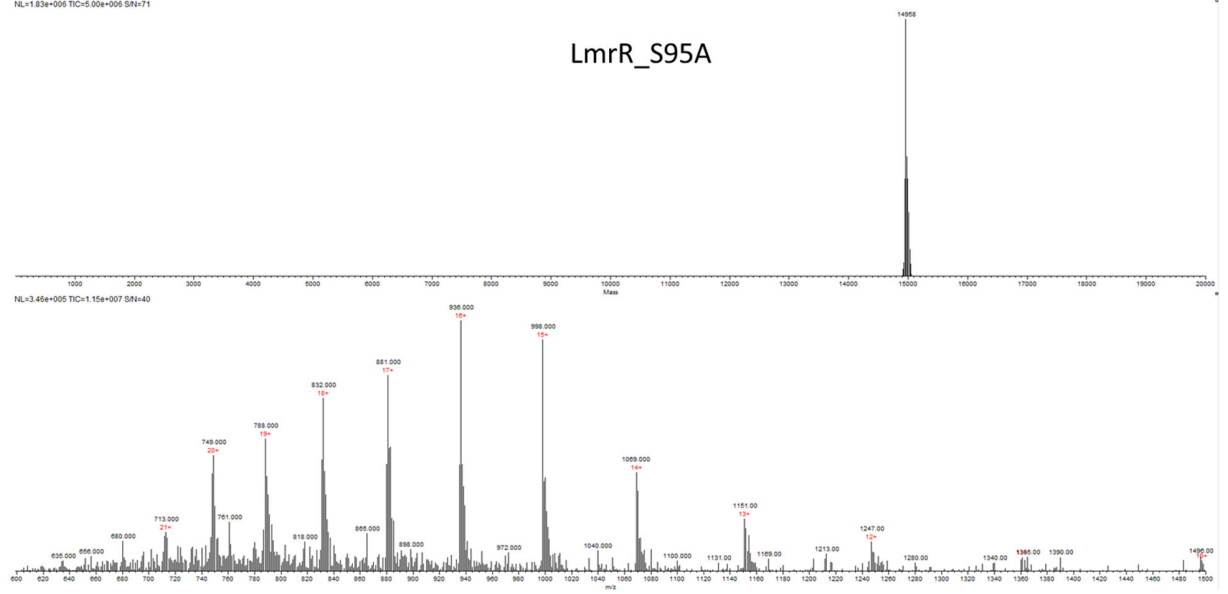

LmrR\_S95A

LmrR\_S97A calculated mass (-Met) 14954.8

NL=1.66e+008 TIC=4.82e+009 S/N=995

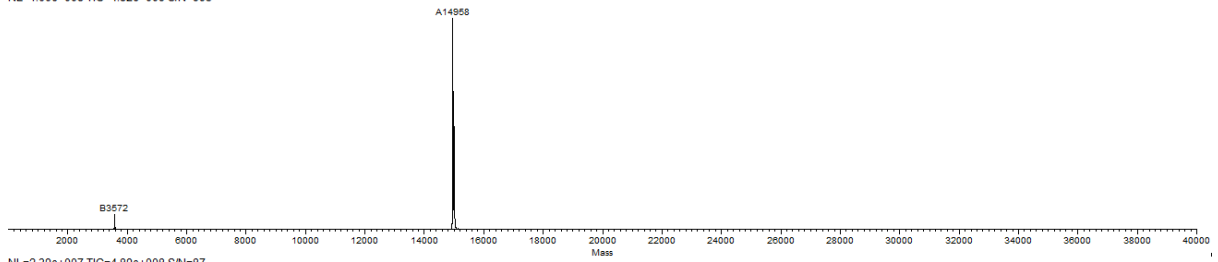

NL=2.39e+007 TIC=4.89e+008 S/N=87

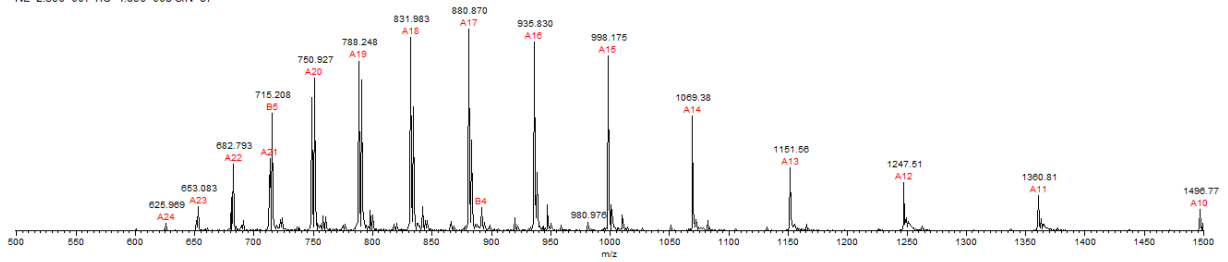

LmrR\_A92E\_M8D calculated mass (-Met) 15012.7

NL=2.50e+007 TIC=4.31e+007 S/N=337

LmrR\_A92E\_M8D

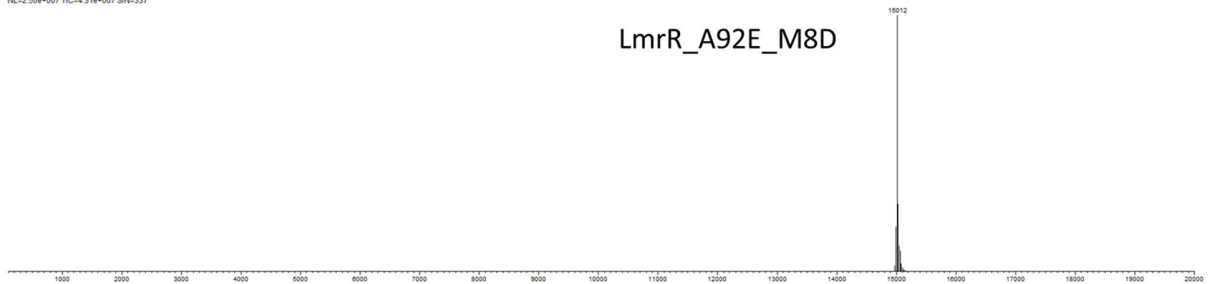

NL=4.52e+006 TIC=5.51e+007 S/N=112

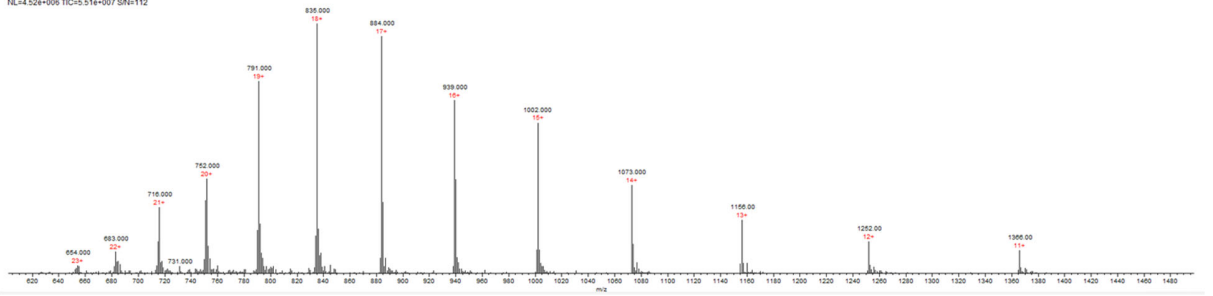

LmrR\_A92E\_M89N calculated mass (-Met) 15011.8

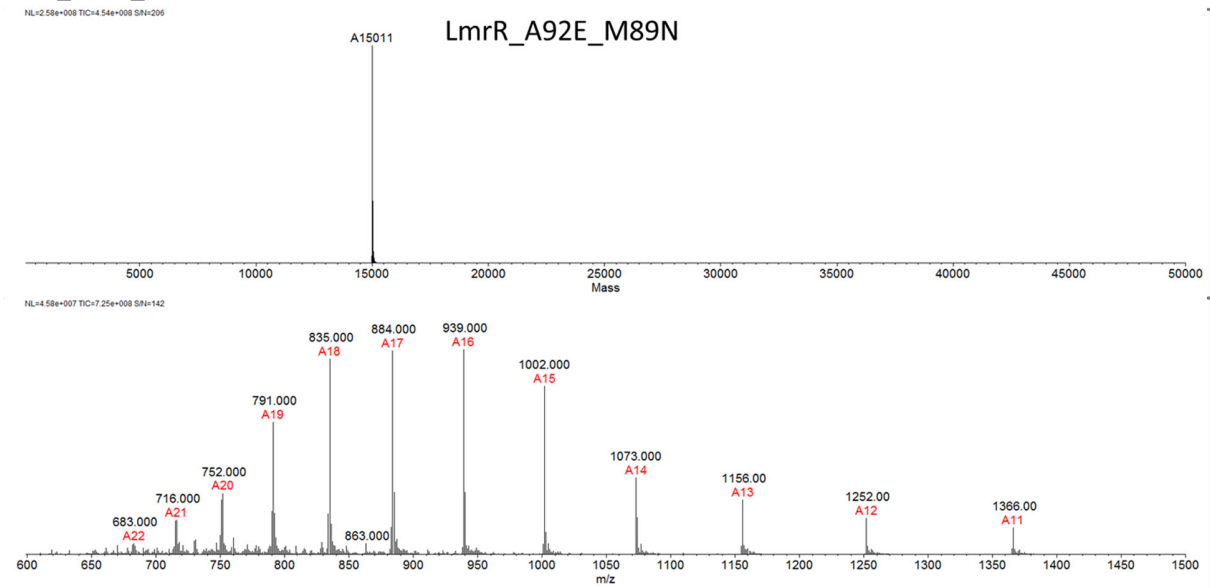

LmrR\_A92E\_M8Y calculated mass (-Met) 15060.8

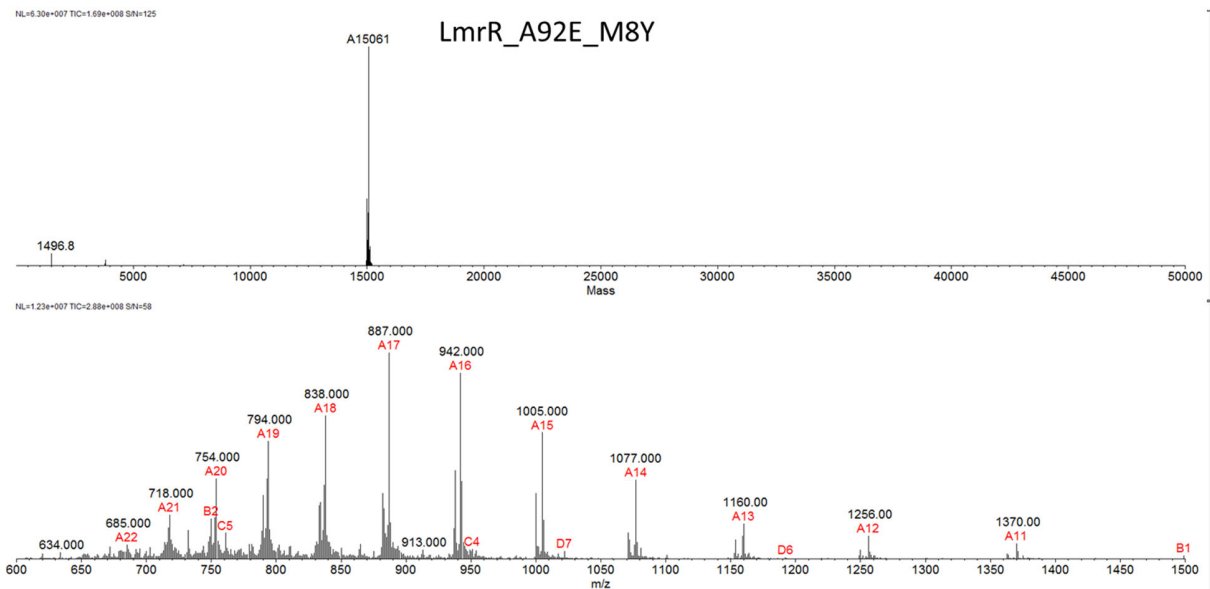

LmrR\_A92E\_M8S calculated mass (-Met) 14984.7

NL=5.63e+006 TIC=3.23e+007 SR=157

LmrR\_A92E\_M8S

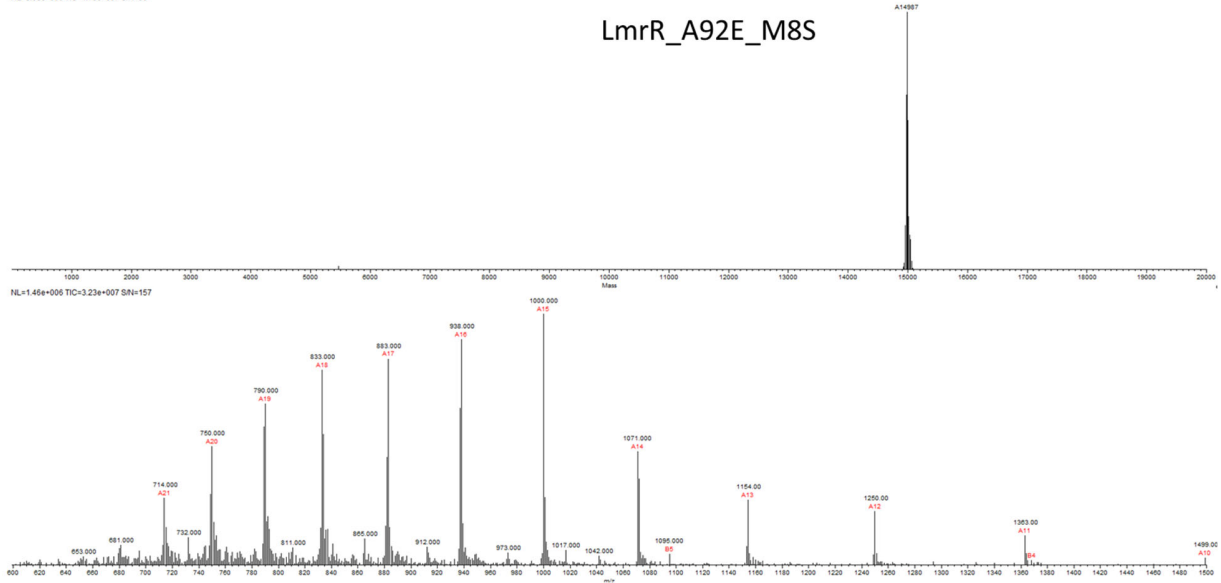

LmrR\_A92E\_N88D calculated mass (-Met) 15029.7

NL=2.47e+009 TIC=4.32e+008 SR=211

LmrR\_A92E\_N88D

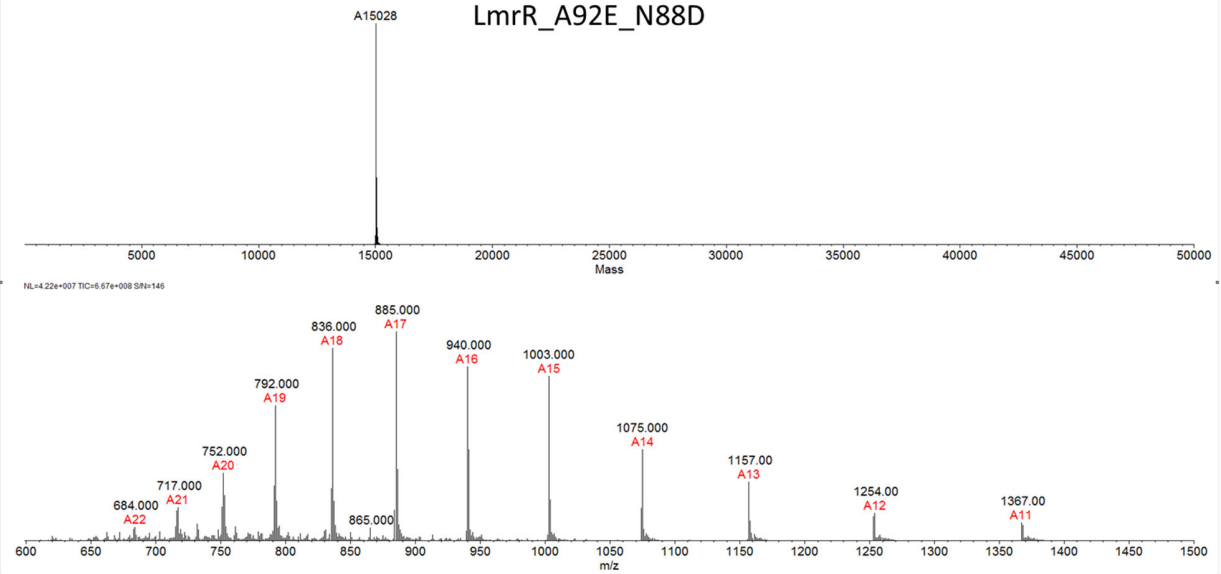



LmrR\_A92E\_N88G calculated mass (-Met) 14971.7

NL=3.47e+008 TIC=5.37e+008 SN=171

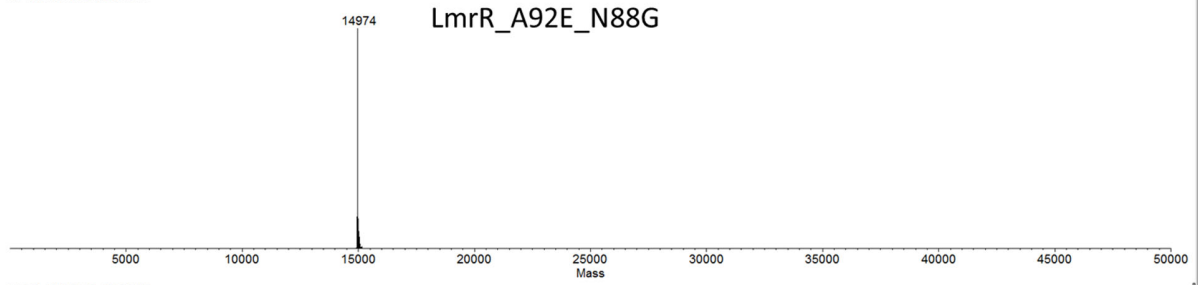

LmrR\_A92E\_N88G

NL=3.47e+007 TIC=5.33e+008 SN=183

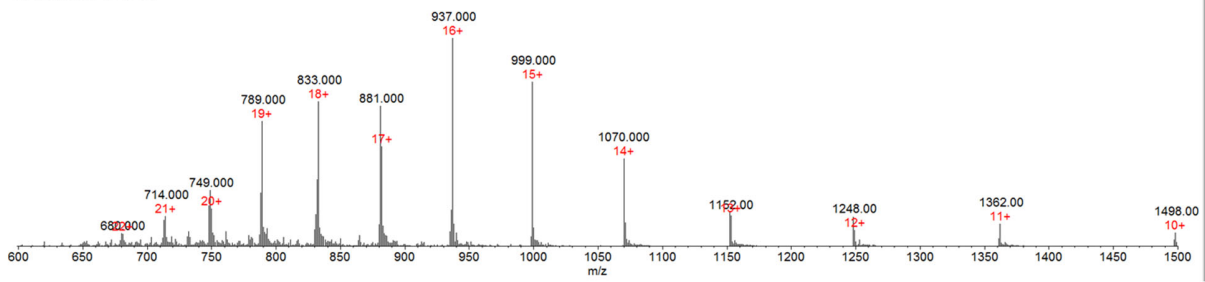

LmrR\_A92E\_N88I calculated mass (-Met) 15027.8

NL=2.25e+008 TIC=4.06e+008 SN=169

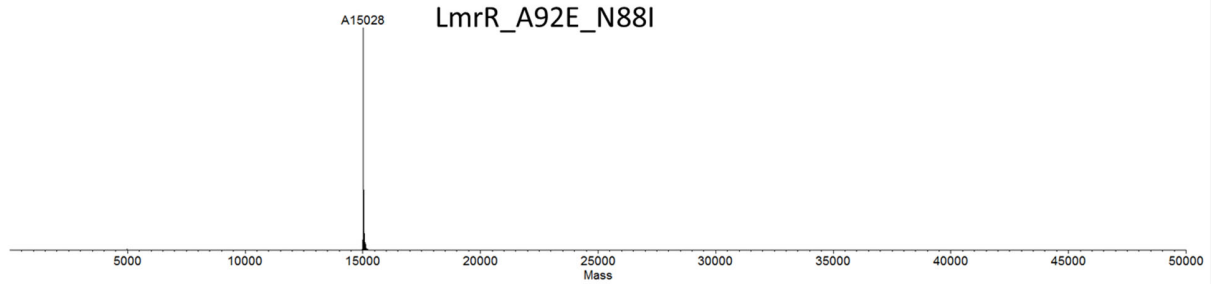

LmrR\_A92E\_N88I

NL=4.00e+007 TIC=6.91e+008 SN=77

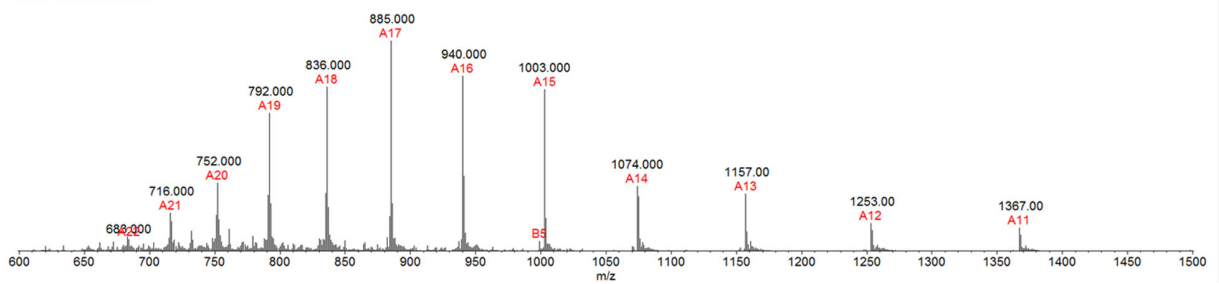

LmrR\_A92E\_M8A calculated mass (-Met) 14968.7

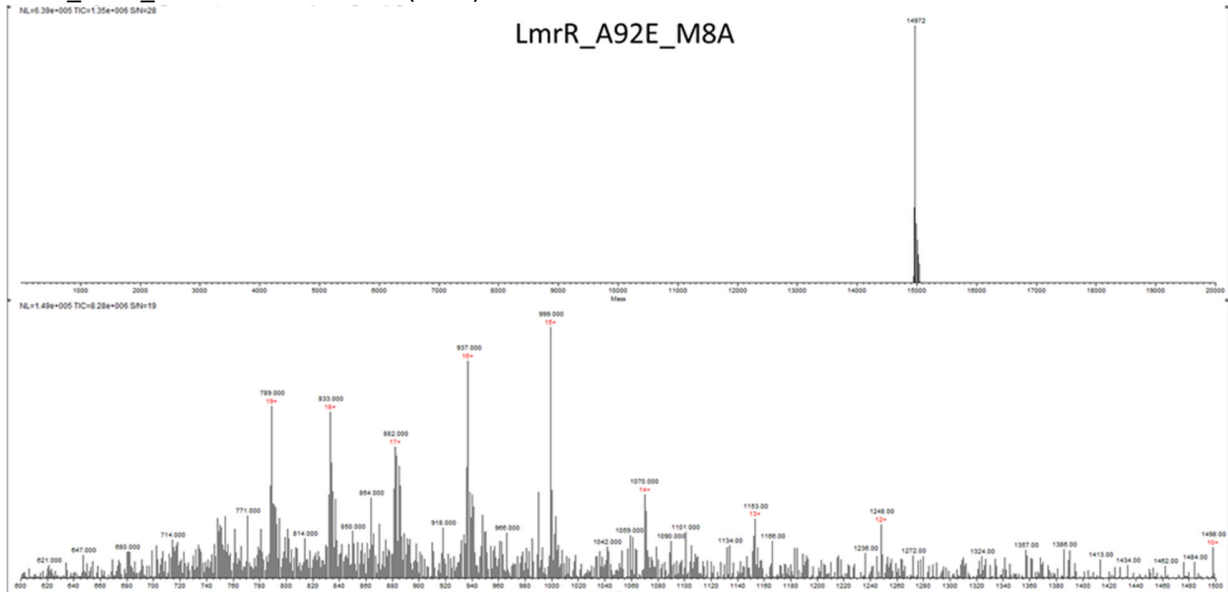

LmrR\_A92E\_N14A calculated mass (-Met) 14985.8

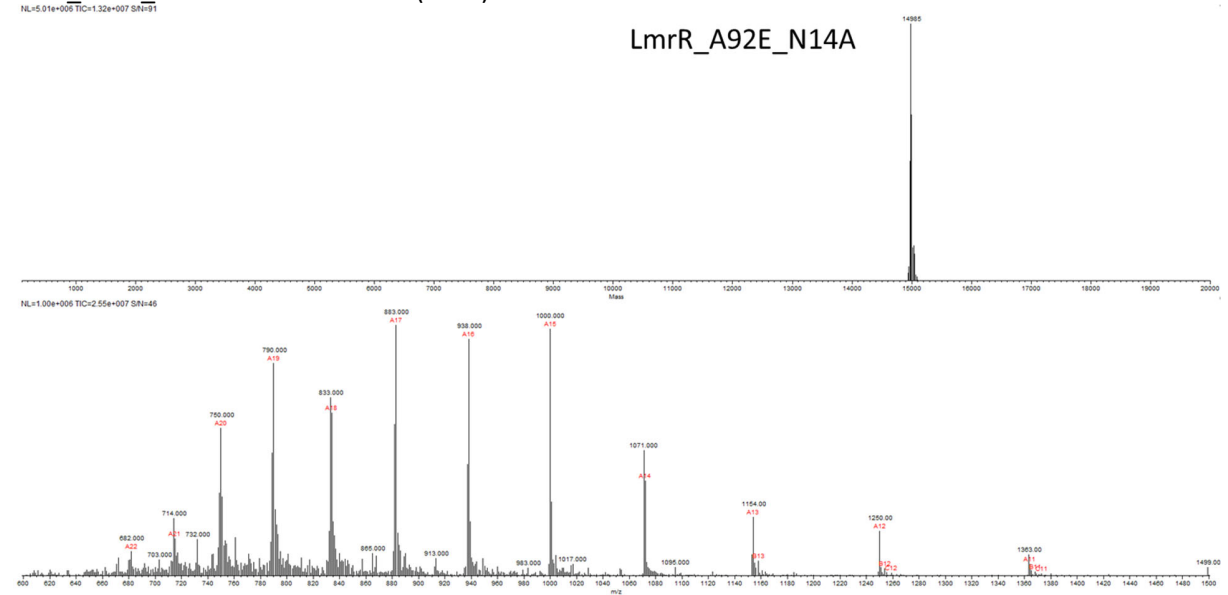

LmrR\_A92E\_N14V calculated mass (-Met) 15013.8

NL=1.15e+008 TIC=3.44e+008 SN=157

LmrR\_A92E\_N14V

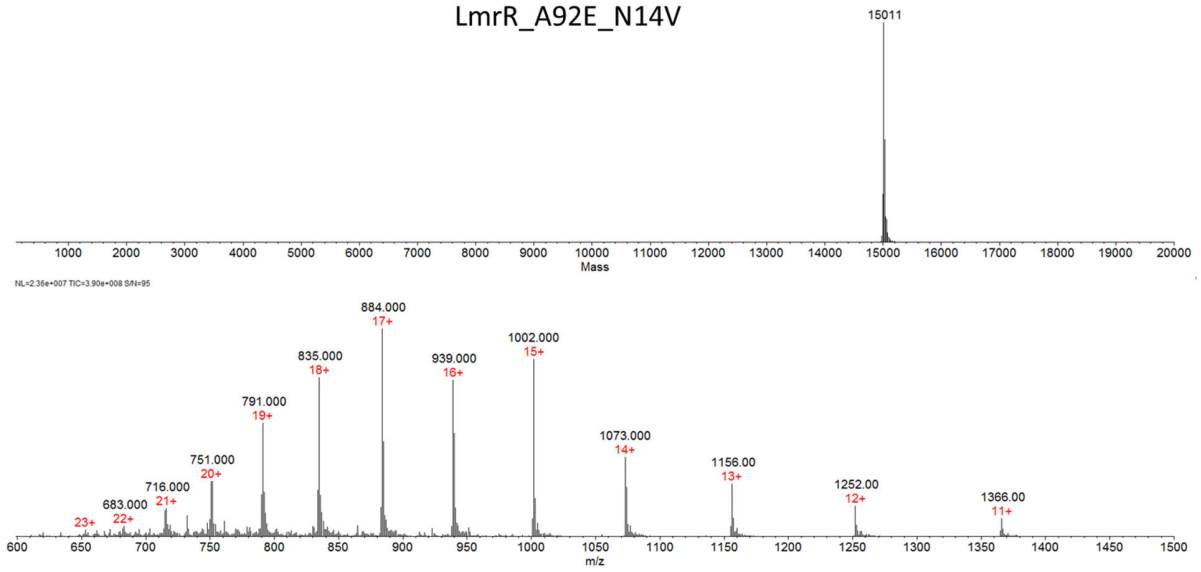

LmrR\_A92E\_N14I calculated mass (-Met) 15027.8

NL=1.77e+007 TIC=3.15e+007 SN=329

LmrR\_A92E\_N14I

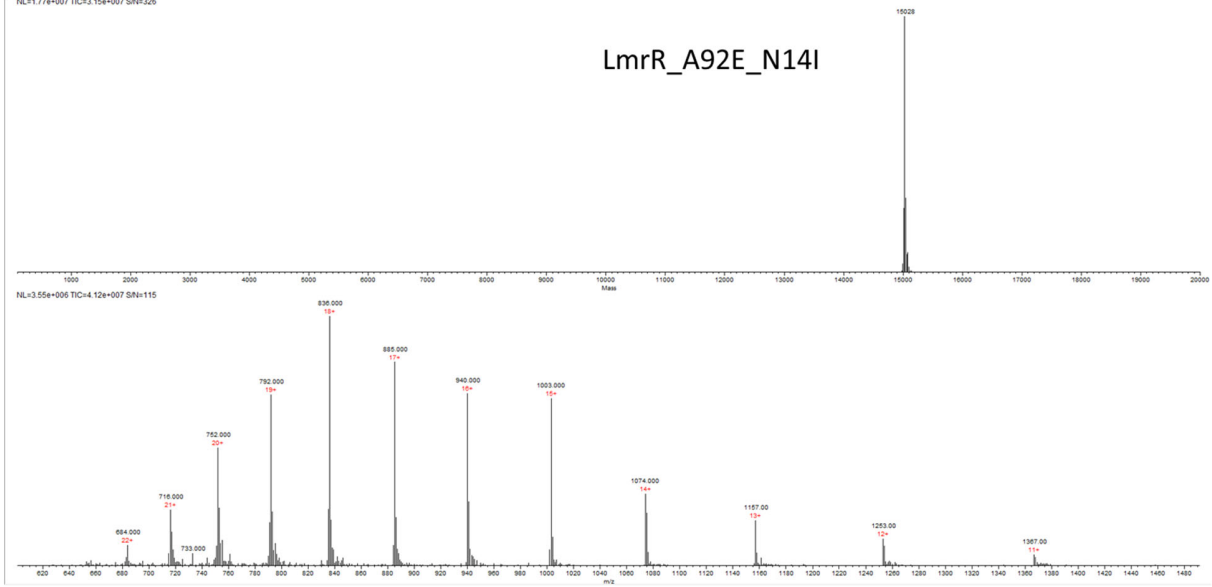

LmrR\_V15A\_A92E calculated mass (-Met) 15000.8

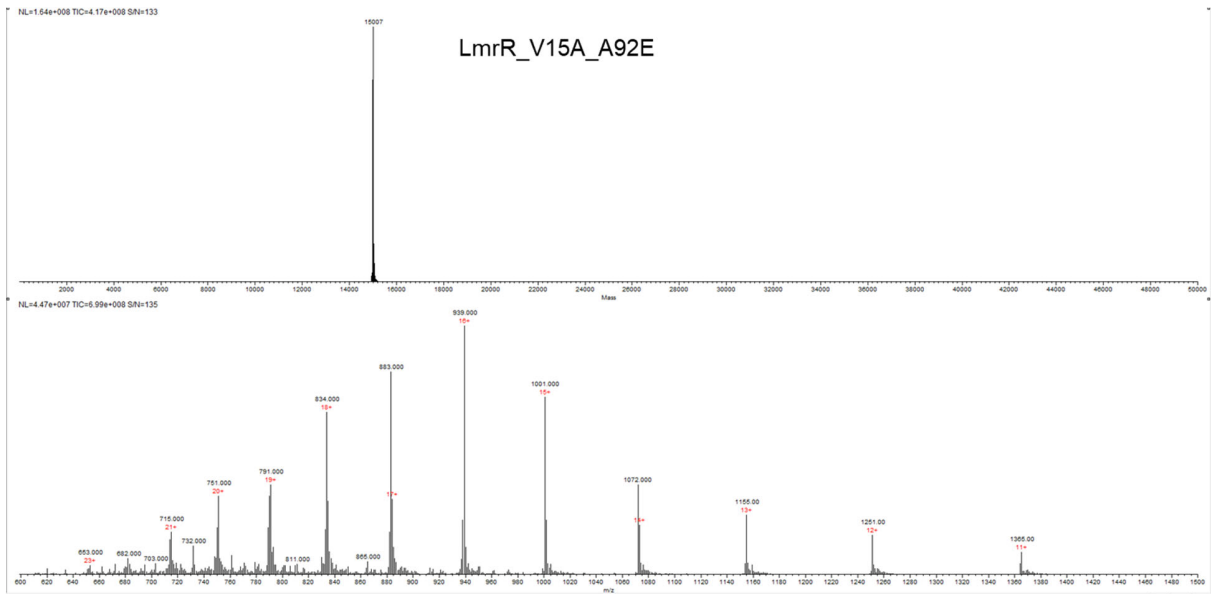

#### 14. HPLC analysis and chromatograms

The reactions were analyzed by adding 50  $\mu\text{L}$  internal standard (2-phenylquinoline, 2 mM in  $\text{CH}_3\text{CN}$ ) to the reaction mixture, followed by extraction with diethyl ether (3 x 500  $\mu\text{L}$ ) and separated organic layer were dried over  $\text{Na}_2\text{SO}_4$ , filtered and concentrated under reduced pressure. Subsequently, the samples were re-dissolved in 150  $\mu\text{L}$  of a heptane:propan-2-ol mixture (9:1) and the yields and enantiomeric excess were determined by HPLC. Calibration curves for quantification of the different products were constructed using pure reference compounds produced synthetically as described in section "Chemical synthesis".

##### *Calibration curve for product 3a (F-C Alkylation of 1 and 2a)*

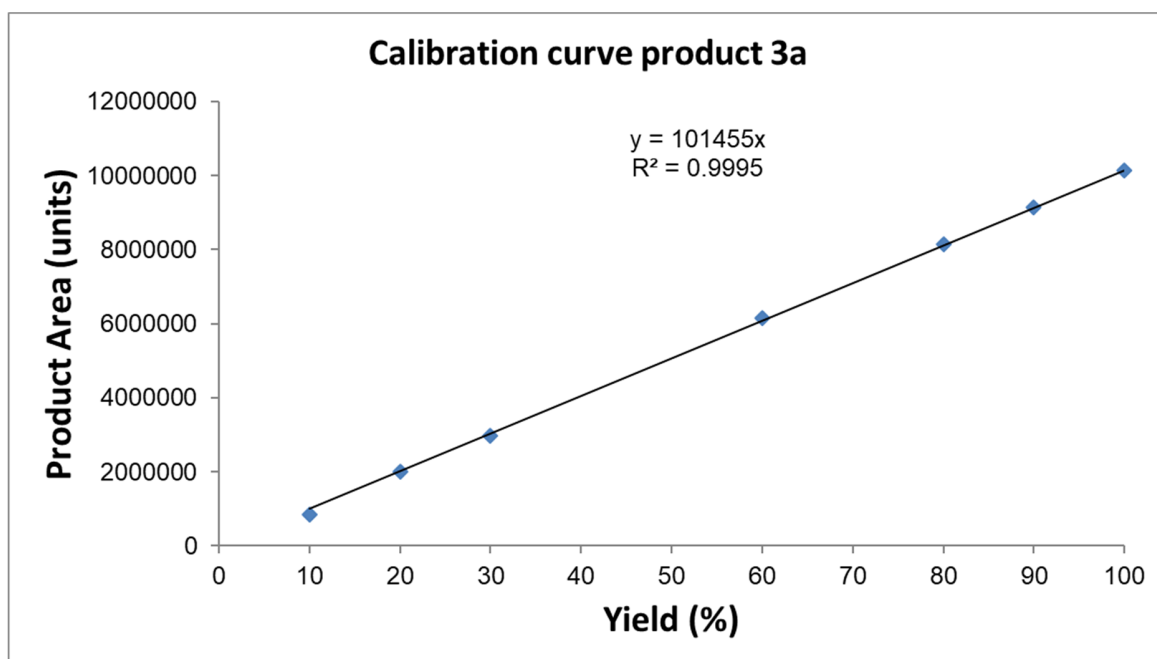

**Calibration curve for product 3b (F-C Alkylation of 1 and 2b)**

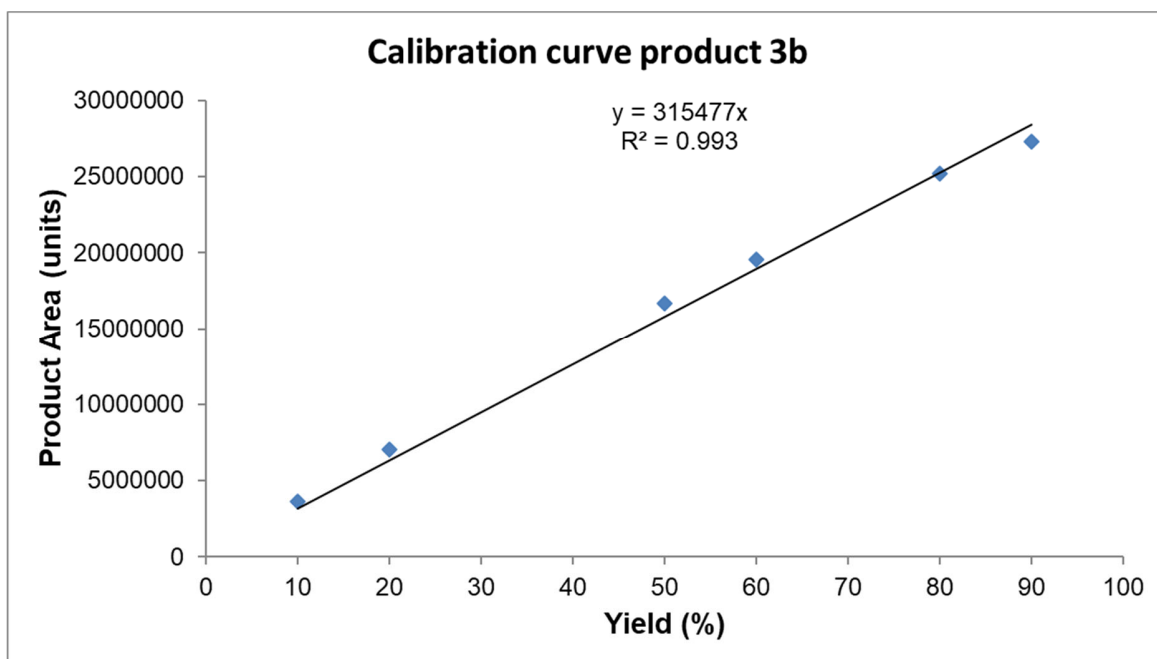

**Calibration curve for product 3c (F-C Alkylation of 1 and 2c)**

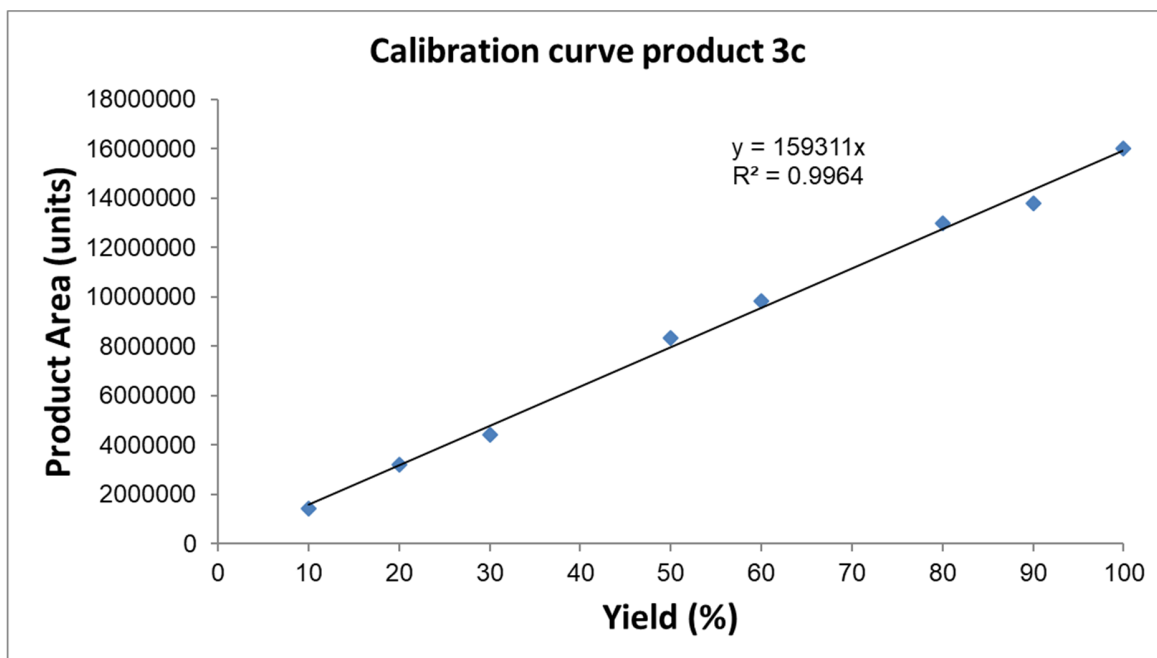



Calibration curve for product 3d (F-C Alkylation of 1 and 2d)

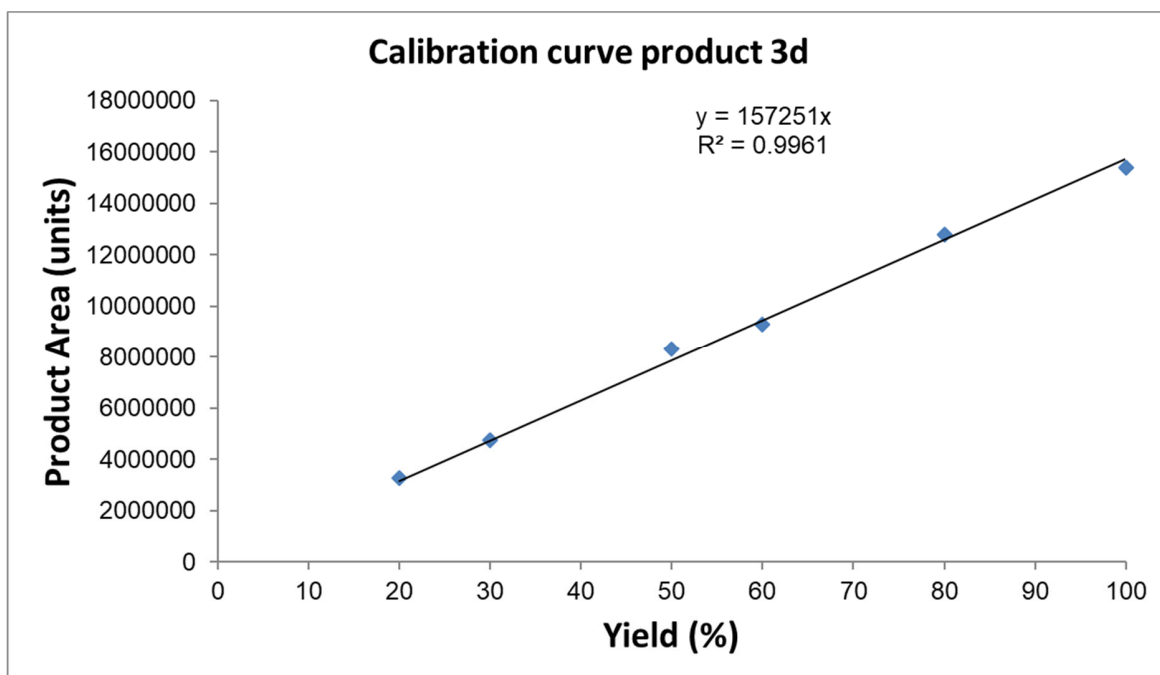



### HPLC Chromatograms

#### Racemate of product 3a (F-C Alkylation of 1 and 2a)

##### <Chromatogram>

mAU

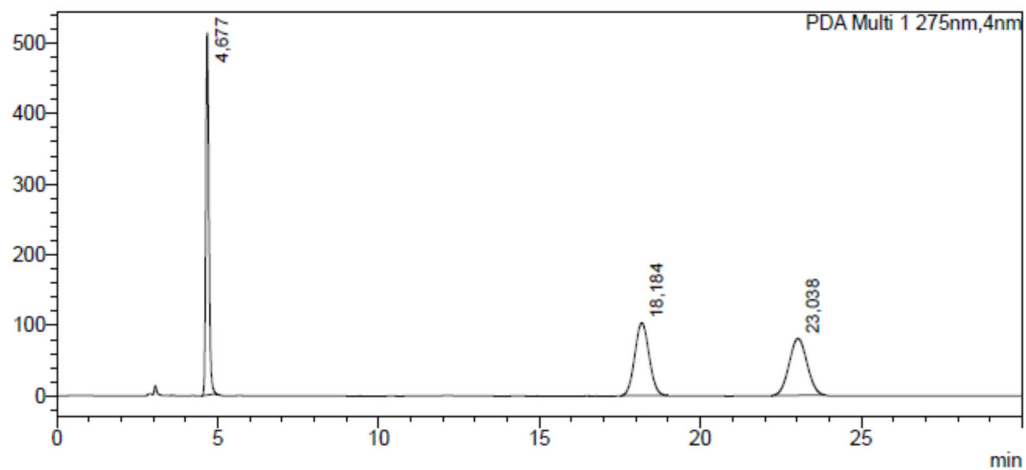

##### <Peak Table>

ELSD-LT2

| Peak# | Ret. Time | Area | Height | Conc. | Unit | Mark | Name |
|-------|-----------|------|--------|-------|------|------|------|
| Total |           |      |        |       |      |      |      |

PDA Ch1 275nm

| Peak# | Ret. Time | Area    | Height | Conc. | Unit | Mark | Name |
|-------|-----------|---------|--------|-------|------|------|------|
| 1     | 4,677     | 3374020 | 512640 | 0,000 |      | M    |      |
| 2     | 18,184    | 3188948 | 103186 | 0,000 |      | M    |      |
| 3     | 23,038    | 3125206 | 80539  | 0,000 |      | M    |      |
| Total |           | 9688174 | 696365 |       |      |      |      |

**Racemate of product 3b (F-C Alkylation of 1 and 2b)**

**<Chromatogram>**

mAU

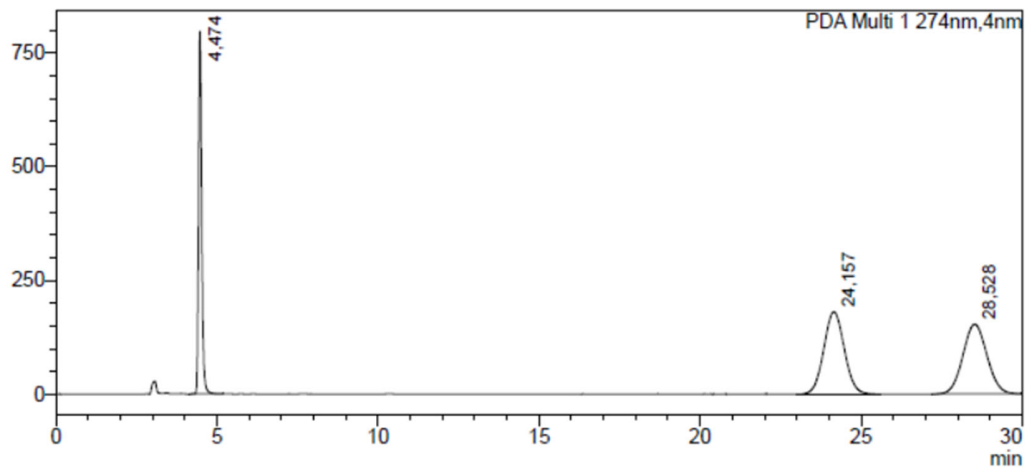

**<Peak Table>**

ELSD-LT2

| Peak# | Ret. Time | Area | Height | Conc. | Unit | Mark | Name |
|-------|-----------|------|--------|-------|------|------|------|
| Total |           |      |        |       |      |      |      |

PDA Ch1 274nm

| Peak# | Ret. Time | Area     | Height  | Conc. | Unit | Mark | Name |
|-------|-----------|----------|---------|-------|------|------|------|
| 1     | 4,474     | 5439200  | 794737  | 0,000 |      |      |      |
| 2     | 24,157    | 8005070  | 180778  | 0,000 |      |      |      |
| 3     | 28,528    | 7975424  | 153295  | 0,000 |      |      |      |
| Total |           | 21419695 | 1128810 |       |      |      |      |

**Racemate of product 3c (F-C Alkylation of 1 and 2c)**

**<Chromatogram>**

mAU

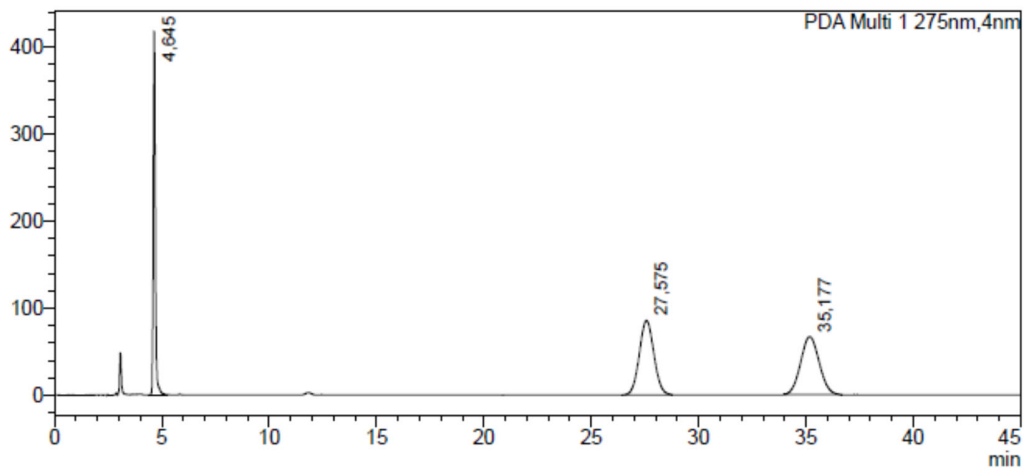

**<Peak Table>**

ELSD-LT2

| Peak# | Ret. Time | Area | Height | Conc. | Unit | Mark | Name |
|-------|-----------|------|--------|-------|------|------|------|
| Total |           |      |        |       |      |      |      |

PDA Ch1 275nm

| Peak# | Ret. Time | Area     | Height | Conc. | Unit | Mark | Name |
|-------|-----------|----------|--------|-------|------|------|------|
| 1     | 4,645     | 2832578  | 416490 | 0,000 |      | M    |      |
| 2     | 27,575    | 4026717  | 85372  | 0,000 |      | M    |      |
| 3     | 35,177    | 3994004  | 66398  | 0,000 |      | M    |      |
| Total |           | 10853299 | 568260 |       |      |      |      |

**Racemate of product 3d (F-C Alkylation of 1 and 2d)**

**<Chromatogram>**

mAU

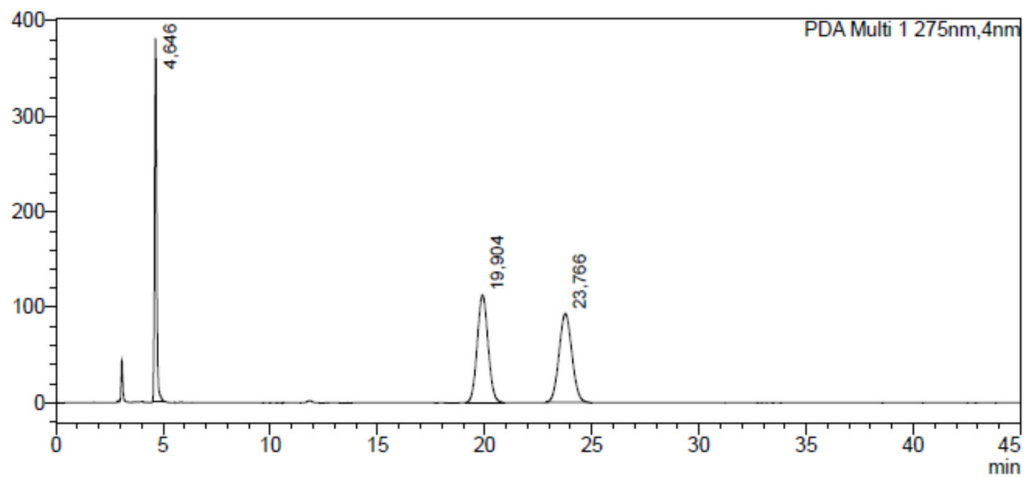

**<Peak Table>**

ELSD-LT2

| Peak# | Ret. Time | Area | Height | Conc. | Unit | Mark | Name |
|-------|-----------|------|--------|-------|------|------|------|
| Total |           |      |        |       |      |      |      |

PDA Ch1 275nm

| Peak# | Ret. Time | Area     | Height | Conc. | Unit | Mark | Name |
|-------|-----------|----------|--------|-------|------|------|------|
| 1     | 4,646     | 2555892  | 379114 | 0,000 |      | M    |      |
| 2     | 19,904    | 3948001  | 112463 | 0,000 |      | M    |      |
| 3     | 23,766    | 3873609  | 92885  | 0,000 |      | M    |      |
| Total |           | 10377502 | 584462 |       |      |      |      |

*Cell free extract\_LmrR*  $\subset$  *Cu(II)*-Phen (*F*-C Alkylolation of **1** and **2a**)

<Chromatogram>

mAU

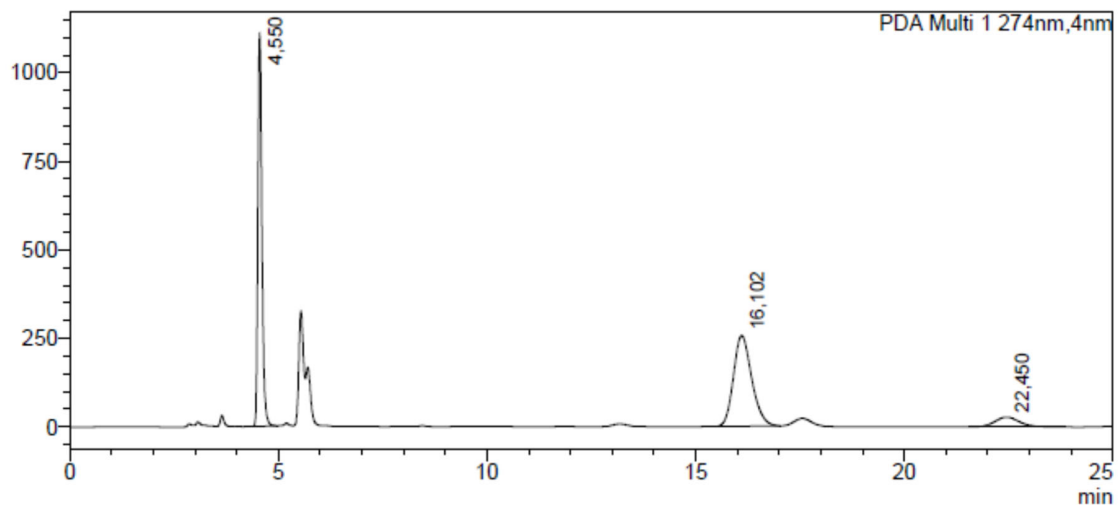

<Peak Table>

PDA Ch1 274nm

| Name        | Ret. Time | Area     | Area%   |
|-------------|-----------|----------|---------|
| 2-phenylqui | 4,550     | 7483280  | 45,592  |
|             | 16,102    | 7805759  | 47,557  |
|             | 22,450    | 1124614  | 6,852   |
|             |           | 16413653 | 100,000 |

*Cell free extract\_SUMO\_Cu(II)-Phen (F-C Alkylation of 1 and 2a)*

**<Chromatogram>**

mAU

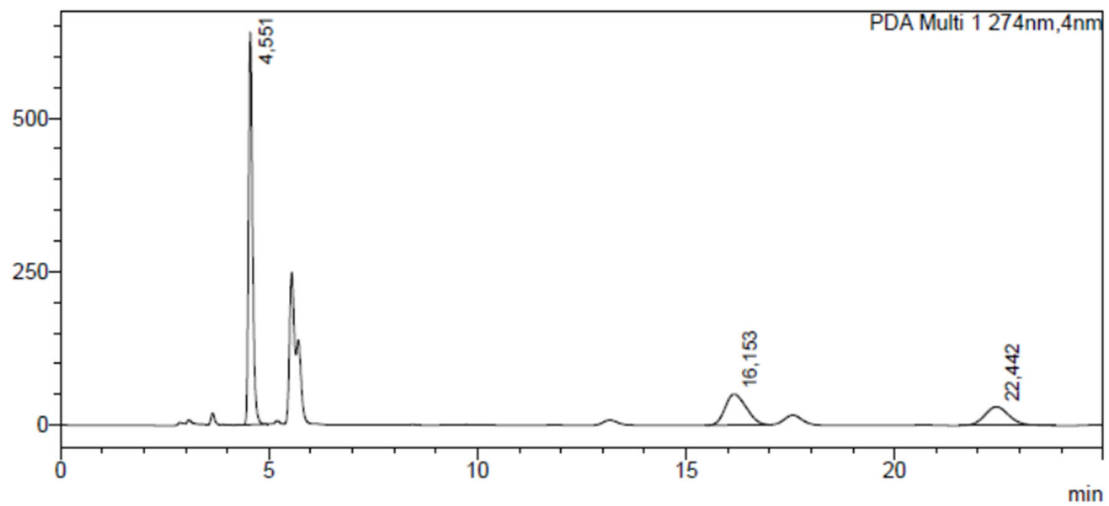

**<Peak Table>**

PDA Ch1 274nm

| Name        | Ret. Time | Area    | Area%   |
|-------------|-----------|---------|---------|
| 2-phenylqui | 4,551     | 4260191 | 58,680  |
|             | 16,153    | 1758852 | 24,226  |
|             | 22,442    | 1241031 | 17,094  |
|             |           | 7260074 | 100,000 |

**Whole cell\_LmrR  $\subset$  Cu(II)-Phen (cytoplasm) (F-C Alkylation of 1 and 2a)**

**<Chromatogram>**

mAU

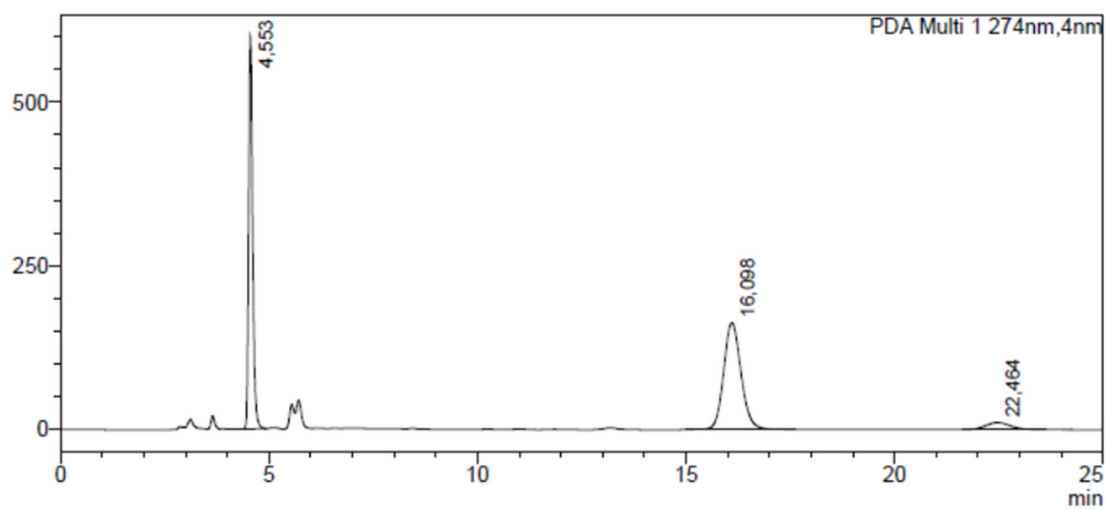

**<Peak Table>**

PDA Ch1 274nm

| Name        | Ret. Time | Area    | Area%   |
|-------------|-----------|---------|---------|
| 2-phenylqui | 4,553     | 4013928 | 43,713  |
|             | 16,098    | 4731596 | 51,528  |
|             | 22,464    | 437002  | 4,759   |
|             |           | 9182526 | 100,000 |

*Whole cell\_LmrR\_no Cu(II)-Phen added (cytoplasm) (F-C Alkylation of 1 and 2a)*

**<Chromatogram>**

mAU

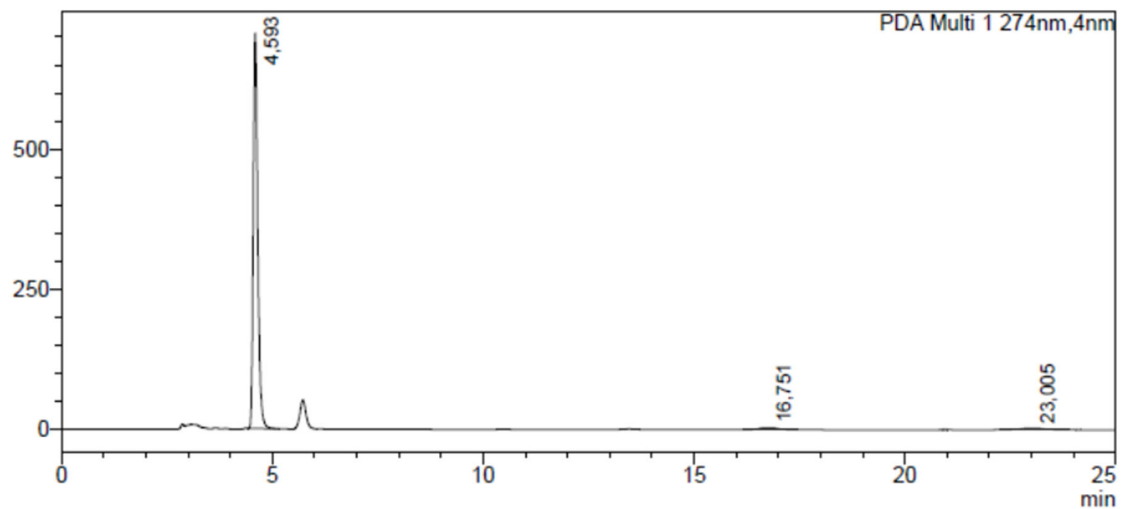

**<Peak Table>**

PDA Ch1 274nm

| Name | Ret. Time | Area    | Area%   |
|------|-----------|---------|---------|
|      | 4,593     | 5194041 | 96,221  |
|      | 16,751    | 101202  | 1,875   |
|      | 23,005    | 102768  | 1,904   |
|      |           | 5398010 | 100,000 |



**Whole cell\_SUMO\_Cu(II)-Phen (cytoplasm) (F-C Alkylation of 1 and 2a)**

**<Chromatogram>**

mAU

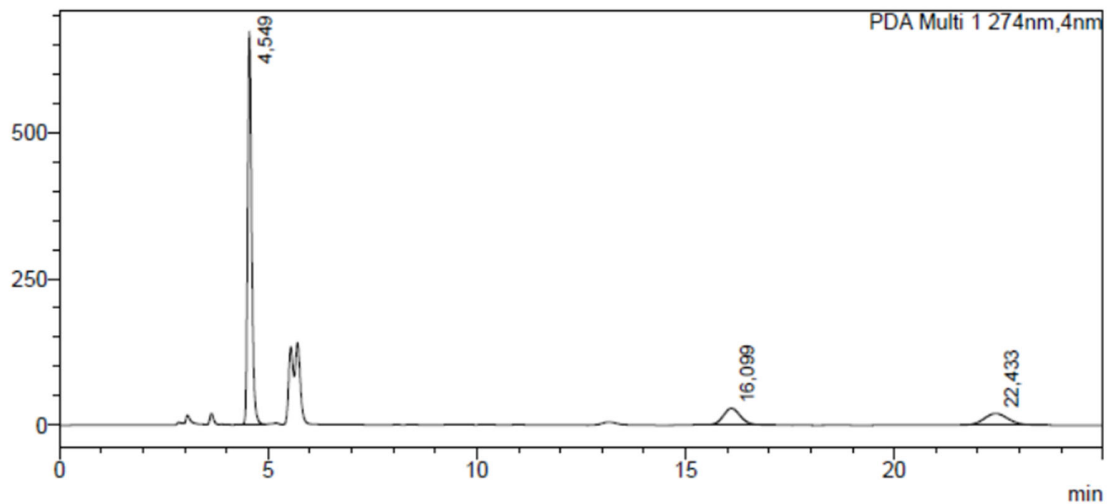

**<Peak Table>**

PDA Ch1 274nm

| Name        | Ret. Time | Area    | Area%   |
|-------------|-----------|---------|---------|
| 2-phenylqui | 4,549     | 4492950 | 73,397  |
|             | 16,099    | 830104  | 13,561  |
|             | 22,433    | 798349  | 13,042  |
|             |           | 6121403 | 100,000 |

**Whole cell\_LmrR\_product 3a added (F-C Alkylation of 1 and 2a)**

**<Chromatogram>**

mAU

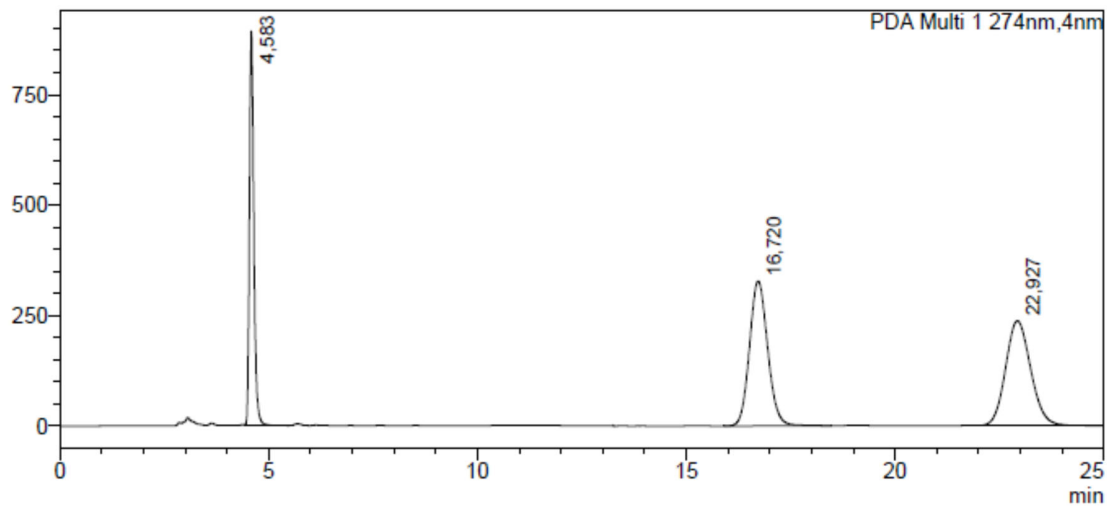

**<Peak Table>**

PDA Ch1 274nm

| Name        | Ret. Time | Area     | Area%   |
|-------------|-----------|----------|---------|
| 2-phenylqui | 4,583     | 6538392  | 24,708  |
|             | 16,720    | 9954867  | 37,618  |
|             | 22,927    | 9969510  | 37,674  |
|             |           | 26462769 | 100,000 |

**Cu(II)-Phen catalyzed reaction (F-C Alkylation of 1 and 2a)**

**<Chromatogram>**

mAU

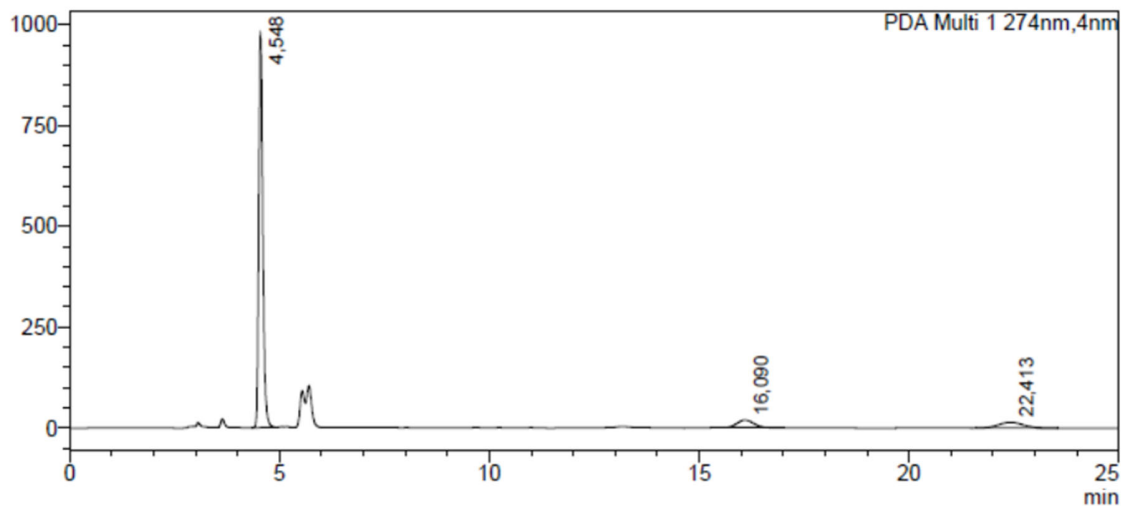

**<Peak Table>**

PDA Ch1 274nm

| Name        | Ret. Time | Area    | Area%   |
|-------------|-----------|---------|---------|
| 2-phenylqui | 4,548     | 6595110 | 85,213  |
|             | 16,090    | 570273  | 7,368   |
|             | 22,413    | 574211  | 7,419   |
|             |           | 7739595 | 100,000 |

**Whole cell\_LmrR\_product 3b added (F-C Alkylation of 1 and 2b)**

**<Chromatogram>**

mAU

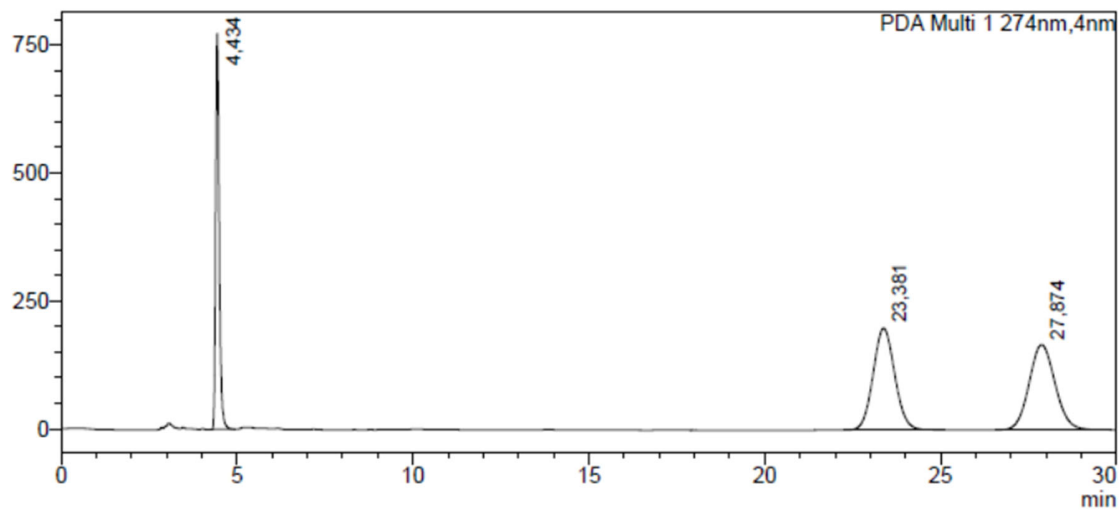

**<Peak Table>**

PDA Ch1 274nm

| Name        | Ret. Time | Area     | Area%   |
|-------------|-----------|----------|---------|
| 2-phenylqui | 4,434     | 5482058  | 24,296  |
| product ee1 | 23,381    | 8521597  | 37,767  |
| product ee2 | 27,874    | 8559990  | 37,937  |
|             |           | 22563645 | 100,000 |

**Cu(II)-Phen catalyzed reaction (F-C Alkylation of 1 and 2b)**

**<Chromatogram>**

mAU

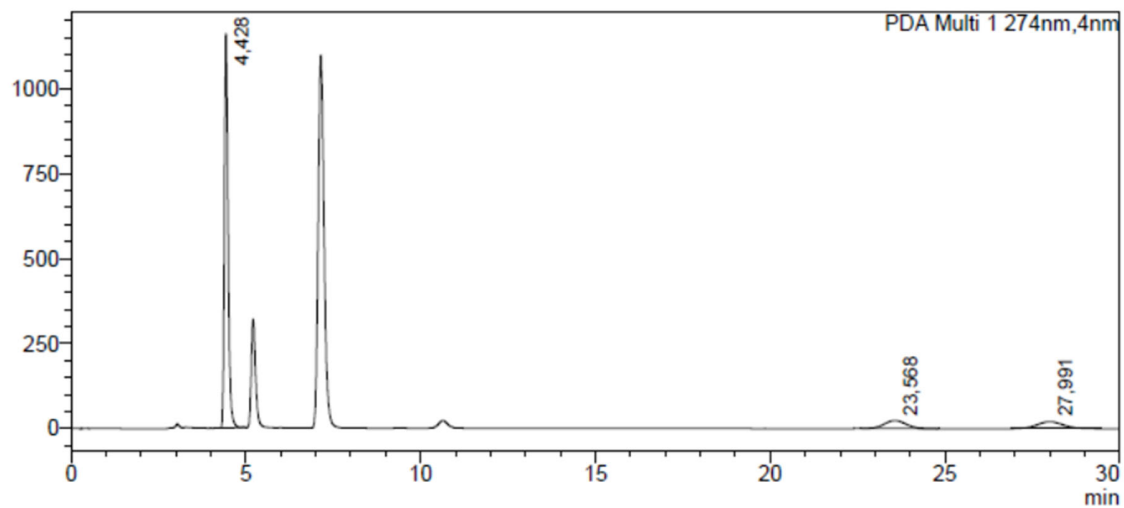

**<Peak Table>**

PDA Ch1 274nm

| Name        | Ret. Time | Area     | Area%   |
|-------------|-----------|----------|---------|
| 2-phenylqui | 4,428     | 8517994  | 80,649  |
| product ee1 | 23,568    | 1020952  | 9,666   |
| product ee2 | 27,991    | 1022828  | 9,684   |
|             |           | 10561774 | 100,000 |

**Whole cell\_LmrR  $\leftarrow$  Cu(II)-Phen (cell fraction) (F-C Alkylation of 1 and 2b)**

**<Chromatogram>**

mAU

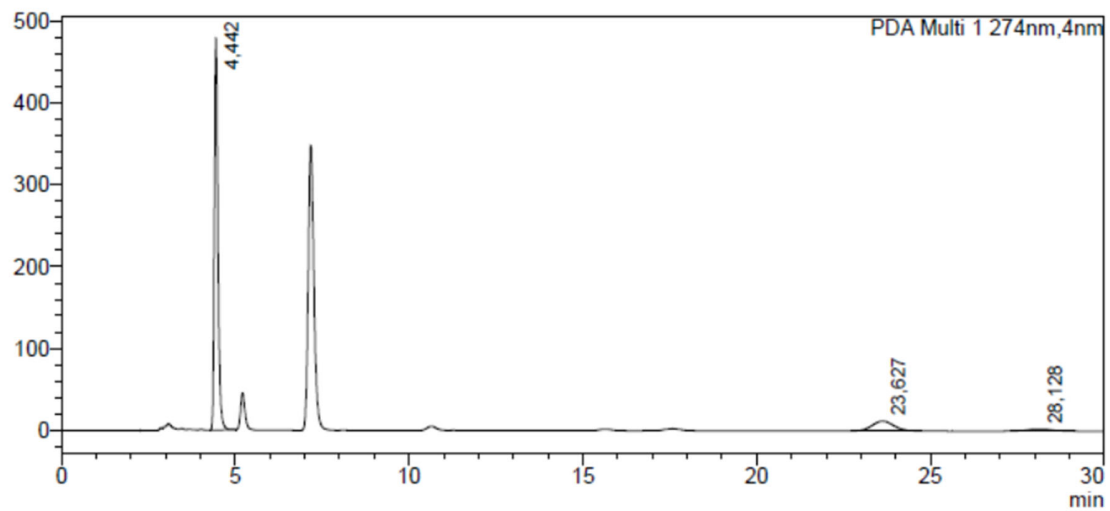

**<Peak Table>**

PDA Ch1 274nm

| Name        | Ret. Time | Area    | Area%   |
|-------------|-----------|---------|---------|
| 2-phenylqui | 4,442     | 3440413 | 84,638  |
| product ee1 | 23,627    | 516573  | 12,708  |
| product ee2 | 28,128    | 107892  | 2,654   |
|             |           | 4064878 | 100,000 |

**Whole cell\_LmrR - Cu(II)-Phen (supernatant fraction) (F-C Alkylation of 1 and 2b)**

**<Chromatogram>**

mAU

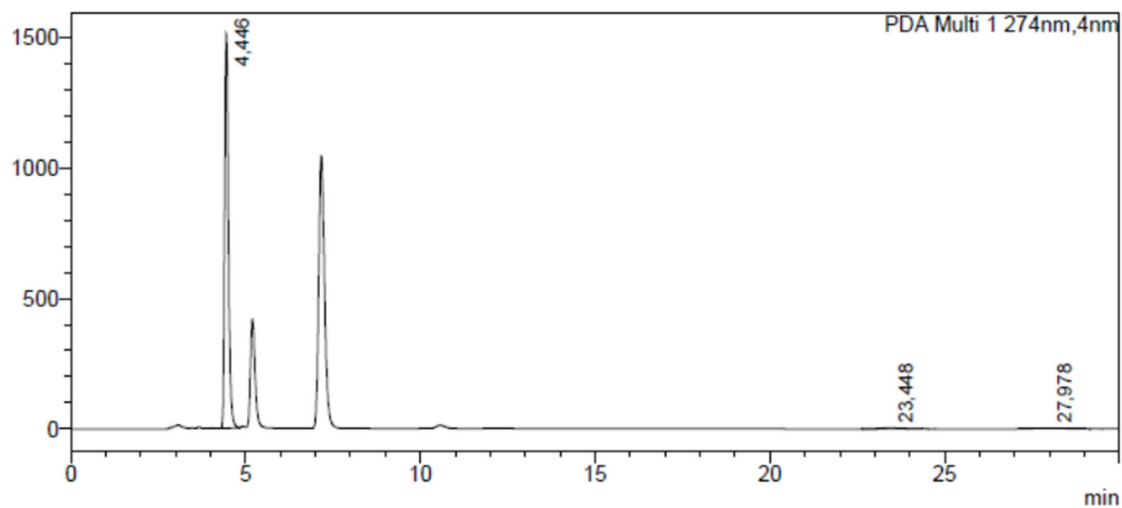

**<Peak Table>**

PDA Ch1 274nm

| Name        | Ret. Time | Area     | Area%   |
|-------------|-----------|----------|---------|
| 2-phenylqui | 4,446     | 11376503 | 97,358  |
| product ee1 | 23,448    | 156254   | 1,337   |
| product ee2 | 27,978    | 152513   | 1,305   |
|             |           | 11685270 | 100,000 |

*Recycled whole cell\_LmrR C Cu(II)-Phen (cell fraction) (F-C Alkylation of 1 and 2a)*

**<Chromatogram>**

mAU

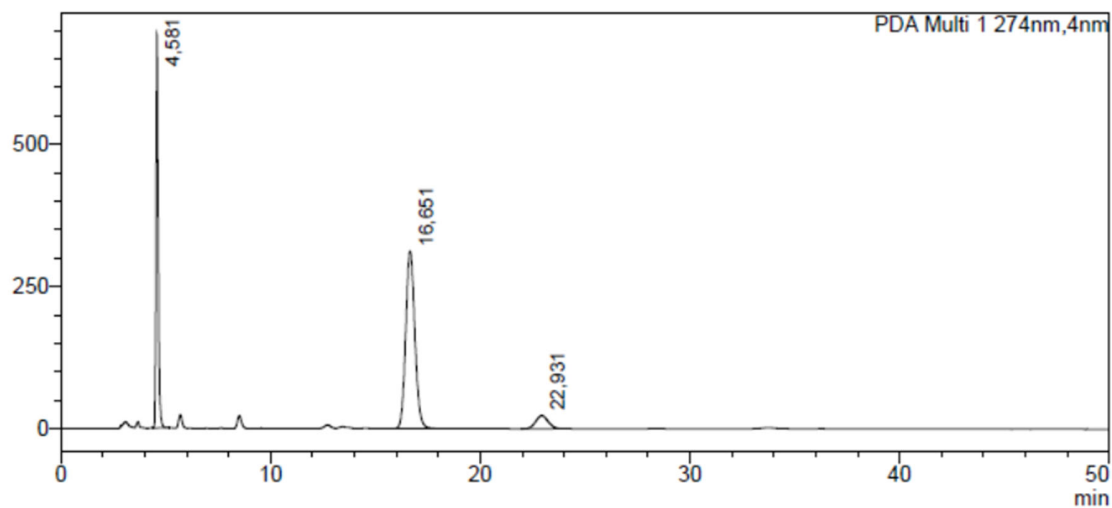

**<Peak Table>**

PDA Ch1 274nm

| Name        | Ret. Time | Area     | Area%   |
|-------------|-----------|----------|---------|
| 2-phenylqui | 4,581     | 5170811  | 33,137  |
|             | 16,651    | 9465699  | 60,660  |
|             | 22,931    | 967993   | 6,203   |
|             |           | 15604503 | 100,000 |



*Recycled whole cell\_LmrR-Cu(II)-Phen(supernatant fraction)(F-C Alkylation of 1 and 2a)*

**<Chromatogram>**

mAU

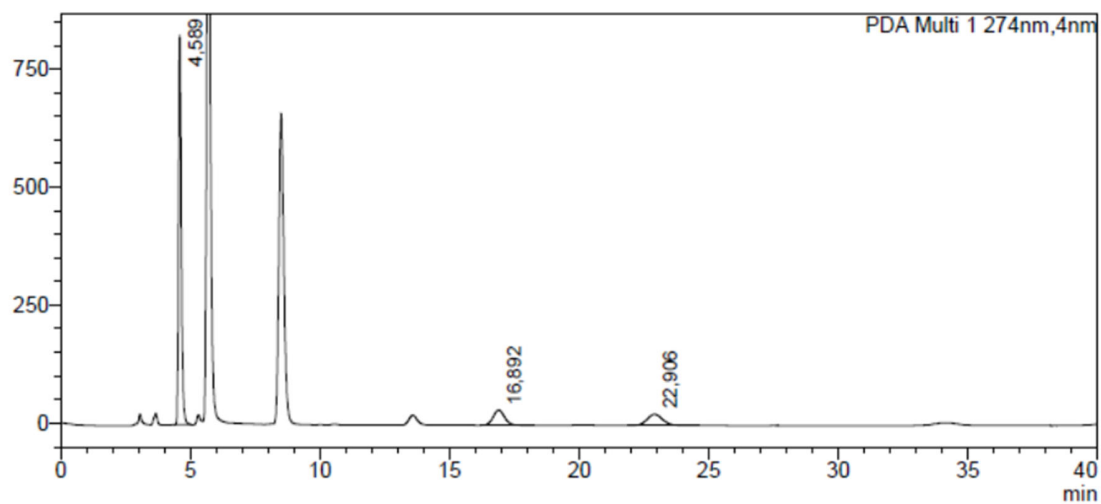

**<Peak Table>**

PDA Ch1 274nm

| Name        | Ret. Time | Area    | Area%   |
|-------------|-----------|---------|---------|
| 2-phenylqui | 4,589     | 6181500 | 75,951  |
|             | 16,892    | 980468  | 12,047  |
|             | 22,906    | 976867  | 12,003  |
|             |           | 8138834 | 100,000 |

**Purified protein LmrR  $\subset$  Cu(II)-Phen (F-C Alkylation of 1 and 2b)**

**<Chromatogram>**

mAU

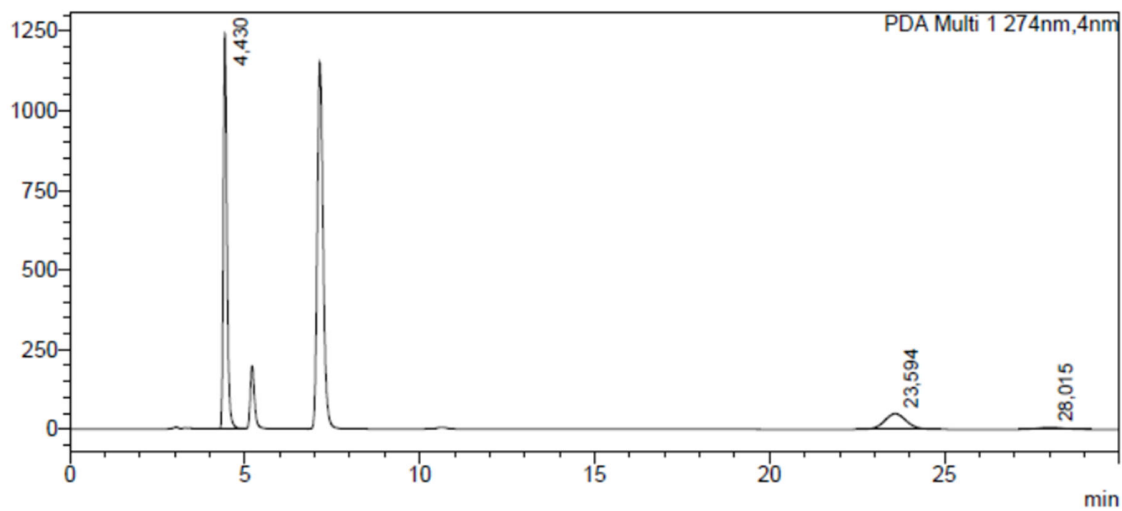

**<Peak Table>**

PDA Ch1 274nm

| Name        | Ret. Time | Area     | Area%   |
|-------------|-----------|----------|---------|
| 2-phenylqui | 4,430     | 8852688  | 78,949  |
| product ee1 | 23,594    | 2086504  | 18,608  |
| product ee2 | 28,015    | 274004   | 2,444   |
|             |           | 11213196 | 100,000 |

Purified protein LmrR\_A92E-Cu(II)-Phen (F-C Alkylation of 1 and 2b)

<Chromatogram>

mAU

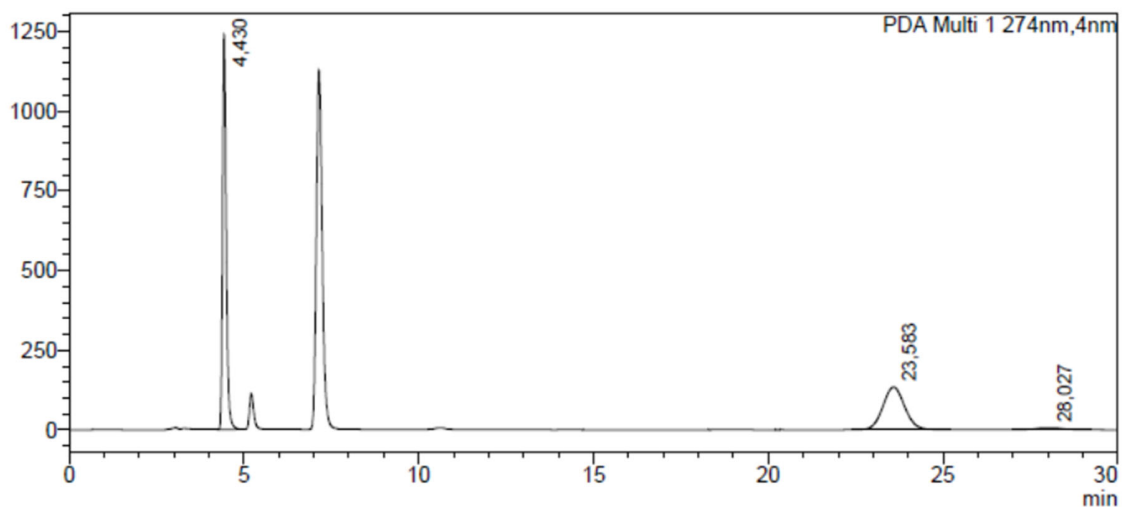

<Peak Table>

PDA Ch1 274nm

| Name        | Ret. Time | Area     | Area%   |
|-------------|-----------|----------|---------|
| 2-phenylqui | 4,430     | 9107589  | 59,967  |
| product ee1 | 23,583    | 5775183  | 38,025  |
| product ee2 | 28,027    | 304982   | 2,008   |
|             |           | 15187754 | 100,000 |

Purified protein LmrR\_A92E\_M8D  $\subset$  Cu(II)-Phen (F-C Alkylation of 1 and 2b)

<Chromatogram>

mAU

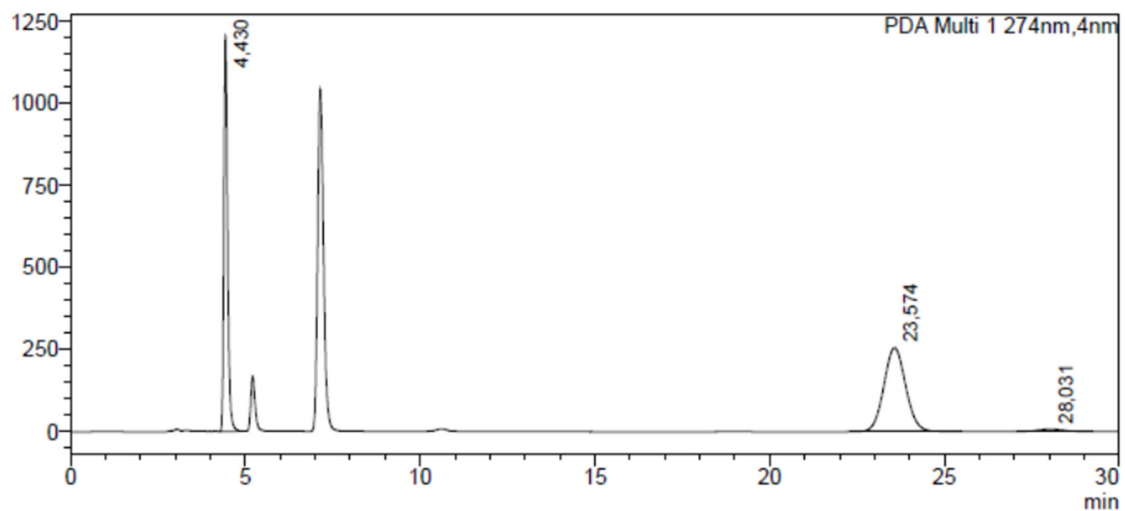

<Peak Table>

PDA Ch1 274nm

| Name        | Ret. Time | Area     | Area%   |
|-------------|-----------|----------|---------|
| 2-phenylqui | 4,430     | 8885152  | 43,606  |
| product ee1 | 23,574    | 11107541 | 54,513  |
| product ee2 | 28,031    | 383068   | 1,880   |
|             |           | 20375761 | 100,000 |

**Purified protein LmrR  $\subset$  Cu(II)-Phen (F-C Alkylation of 1 and 2a)**

**<Chromatogram>**

mAU

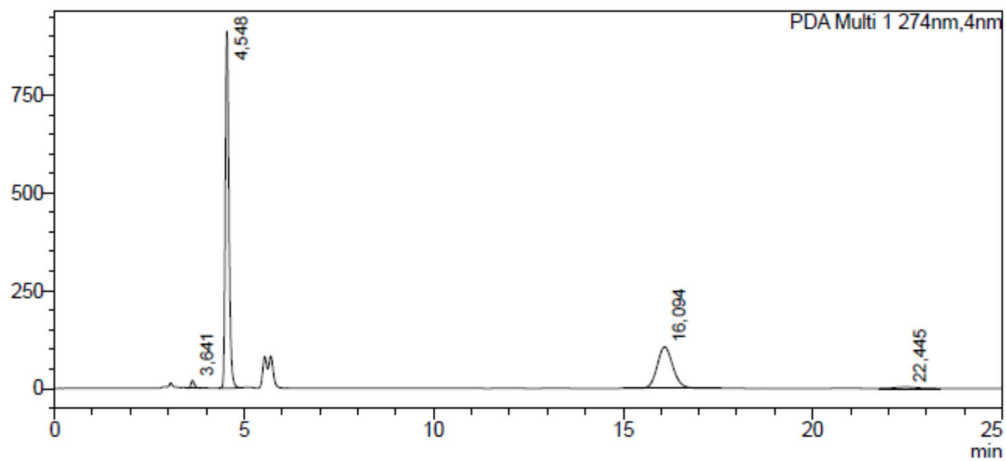

**<Peak Table>**

PDA Ch1 274nm

| Name        | Ret. Time | Area    | Area%   |
|-------------|-----------|---------|---------|
|             | 3,641     | 131143  | 1,389   |
| 2-phenylqui | 4,548     | 6091423 | 64,538  |
|             | 16,094    | 3073856 | 32,567  |
|             | 22,445    | 142141  | 1,506   |
|             |           | 9438563 | 100,000 |

**Purified protein LmrR\_A92E-Cu(II)-Phen (F-C Alkylation of 1 and 2a)**

**<Chromatogram>**

mAU

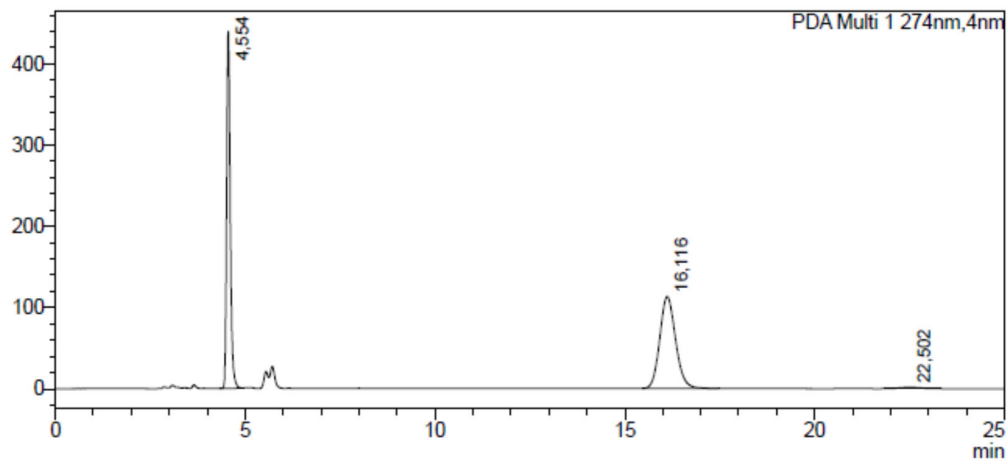

**<Peak Table>**

PDA Ch1 274nm

| Name        | Ret. Time | Area    | Area%   |
|-------------|-----------|---------|---------|
| 2-phenylqui | 4,554     | 2923629 | 46,554  |
|             | 16,116    | 3283394 | 52,283  |
|             | 22,502    | 73040   | 1,163   |
|             |           | 6280064 | 100,000 |

**Purified protein LmrR\_A92E\_M8D  $\subset$  Cu(II)-Phen (F-C Alkylation of 1 and 2a)**

**<Chromatogram>**

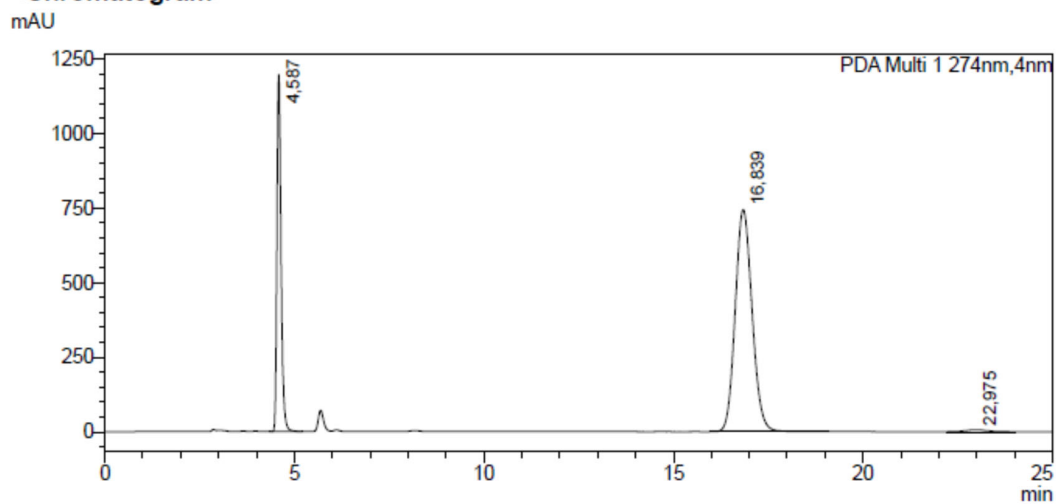

**<Peak Table>**

PDA Ch1 274nm

| Name        | Ret. Time | Area     | Area%   |
|-------------|-----------|----------|---------|
| 2-phenylqui | 4,587     | 9080724  | 28,013  |
|             | 16,839    | 23074989 | 71,184  |
|             | 22,975    | 260199   | 0,803   |
|             |           | 32415912 | 100,000 |

**Purified protein LmrR  $\subset$  Cu(II)-Phen (F-C Alkylation of 1 and 2c)**

**<Chromatogram>**

mAU

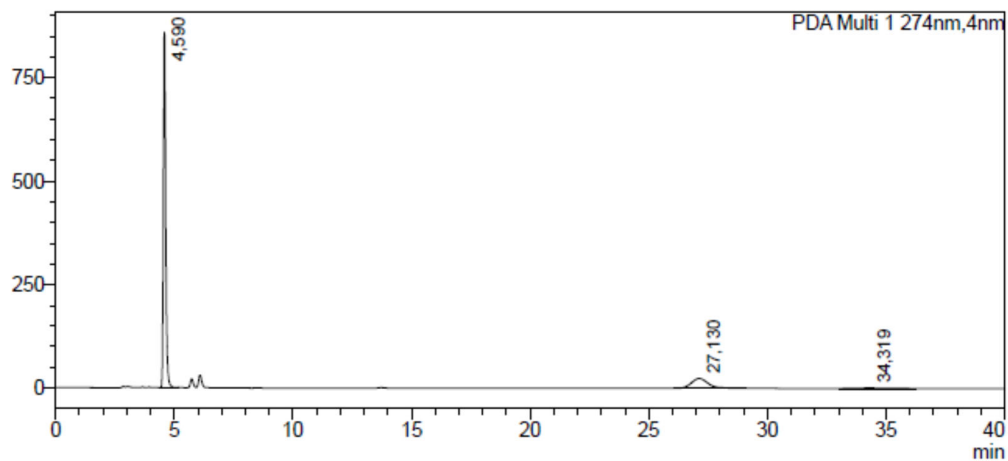

**<Peak Table>**

PDA Ch1 274nm

| Name        | Ret. Time | Area    | Area%   |
|-------------|-----------|---------|---------|
| 2-phenylqui | 4,590     | 5957982 | 81,840  |
|             | 27,130    | 1209410 | 16,613  |
|             | 34,319    | 112682  | 1,548   |
|             |           | 7280074 | 100,000 |



**Purified protein LmrR\_A92E - Cu(II)-Phen (F-C Alkylation of 1 and 2c)**

**<Chromatogram>**

mAU

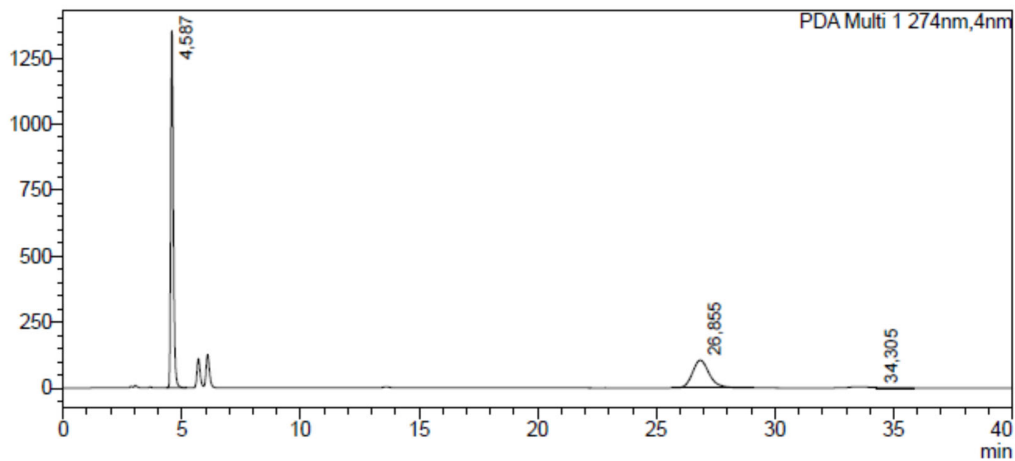

**<Peak Table>**

PDA Ch1 274nm

| Name        | Ret. Time | Area     | Area%   |
|-------------|-----------|----------|---------|
| 2-phenylqui | 4,587     | 10407838 | 65,976  |
|             | 26,855    | 5231343  | 33,162  |
|             | 34,305    | 136043   | 0,862   |
|             |           | 15775224 | 100,000 |

**Purified protein LmrR\_A92E\_M8D  $\subset$  Cu(II)-Phen (F-C Alkylation of 1 and 2c)**

**<Chromatogram>**

mAU

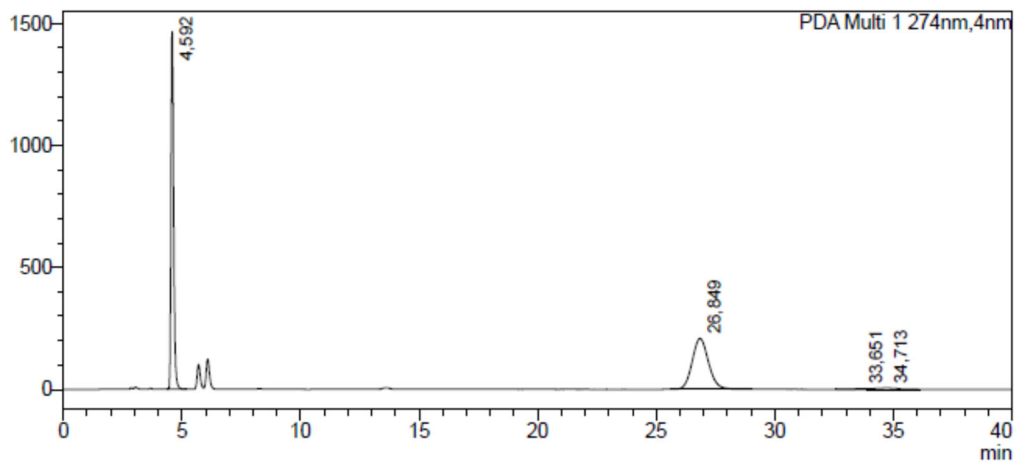

**<Peak Table>**

PDA Ch1 274nm

| Name        | Ret. Time | Area     | Area%   |
|-------------|-----------|----------|---------|
| 2-phenylqui | 4,592     | 11389697 | 52,046  |
|             | 26,849    | 10013569 | 45,758  |
|             | 33,651    | 109052   | 0,498   |
|             | 34,713    | 371512   | 1,698   |
|             |           | 21883831 | 100,000 |

**Purified protein LmrR\_A92E-Cu(II)-Phen (F-C Alkylation of 1 and 2d)**

**<Chromatogram>**

mAU

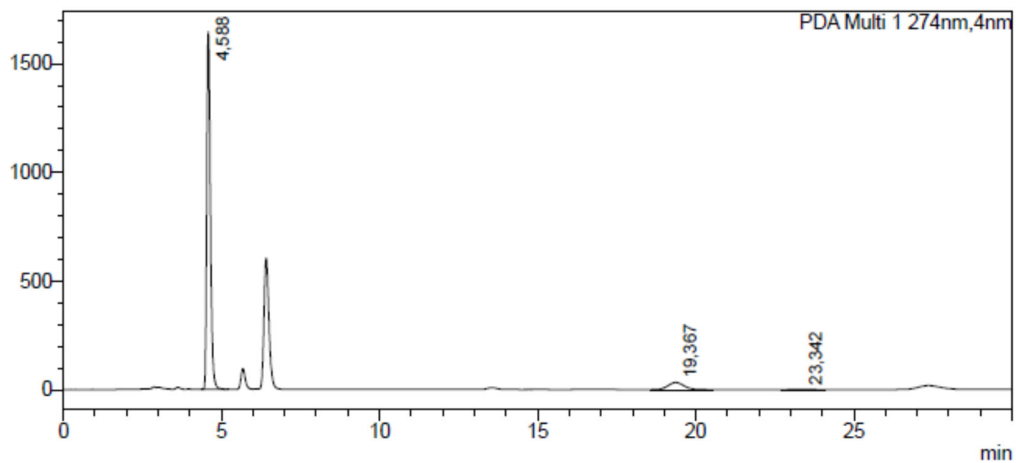

**<Peak Table>**

PDA Ch1 274nm

| Name        | Ret. Time | Area     | Area%   |
|-------------|-----------|----------|---------|
| 2-phenylqui | 4,588     | 13215013 | 91,756  |
|             | 19,367    | 1155051  | 8,020   |
| product ee1 | 23,342    | 32347    | 0,225   |
|             |           | 14402411 | 100,000 |

**Purified protein LmrR\_A92E\_M8D  $\subset$  Cu(II)-Phen (F-C Alkylation of 1 and 2d)**

**<Chromatogram>**

mAU

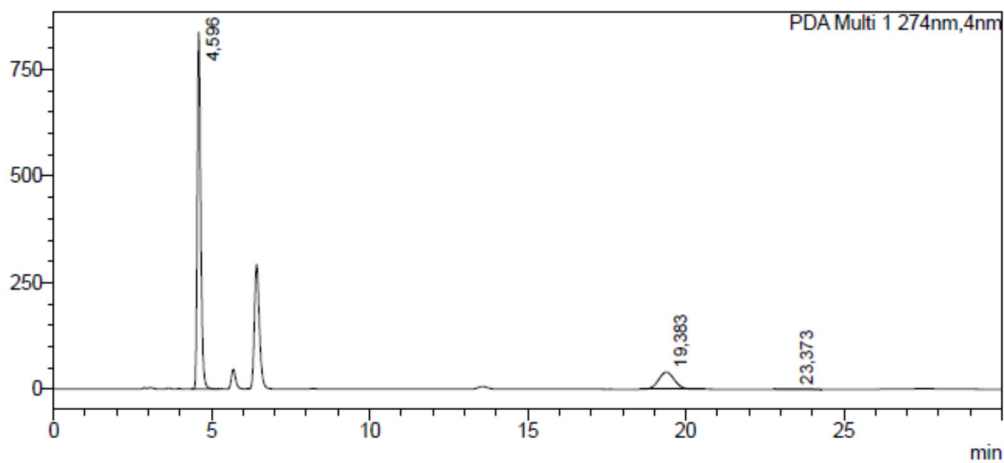

**<Peak Table>**

PDA Ch1 274nm

| Name        | Ret. Time | Area    | Area%   |
|-------------|-----------|---------|---------|
| 2-phenylqui | 4,596     | 6370063 | 81,345  |
|             | 19,383    | 1417054 | 18,096  |
| product ee1 | 23,373    | 43779   | 0,559   |
|             |           | 7830896 | 100,000 |

### ***Diels-Alder reaction***

The reactions were analyzed by adding 50  $\mu\text{L}$  internal standard (2-phenylquinoline, 2 mM in  $\text{CH}_3\text{CN}$ ) to the reaction mixture, followed by extraction with diethyl ether (3 x 500  $\mu\text{L}$ ) and separated organic layer were dried over  $\text{Na}_2\text{SO}_4$ , filtered and concentrated under reduced pressure. Subsequently, the samples were re-dissolved in 150  $\mu\text{L}$  of a heptane:propan-2-ol mixture (9:1) and the yields and enantiomeric excess were determined by HPLC (Daicel chiralpak AD-H). Calibration curves for quantification of the different products were constructed using pure reference compounds produced synthetically as described in section "Chemical synthesis".

***Calibration curve for product analyzed by HPLC (Diels-Alder reaction of aza-chalcone and cyclopentadiene)***

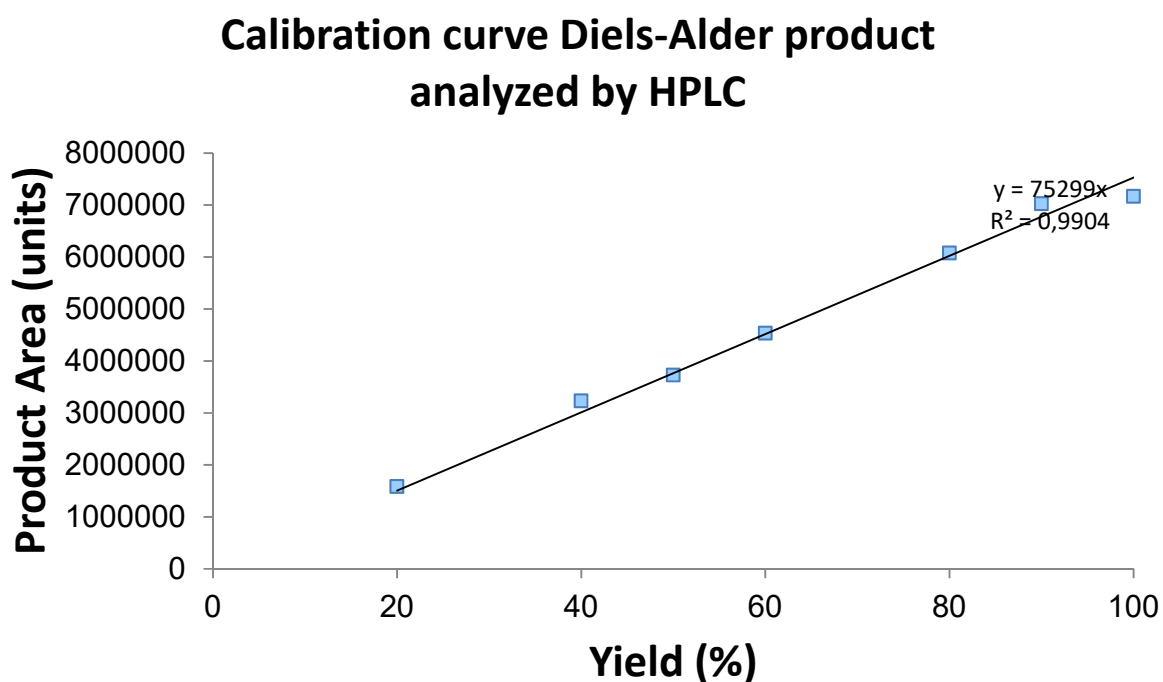

The reactions were analyzed by adding 50  $\mu\text{L}$  internal standard (2-phenylquinoline, 2 mM in  $\text{CH}_3\text{CN}$ ) to the reaction mixture, followed by liquid-liquid extraction using diethyl ether (2 x 0.75 mL). The organic phase was filtered and then evaporated under reduced pressure. Subsequently, the samples were re-dissolved in 150  $\mu\text{L}$  of a water:methanol mixture (1:1) and the yield was determined by UPLC. Calibration curves for quantification of the different products were constructed using pure reference compounds produced synthetically as described in section "Chemical synthesis".

***Calibration curve for product analyzed by UPLC (Diels-Alder reaction of aza-chalcone and cyclopentadiene)***

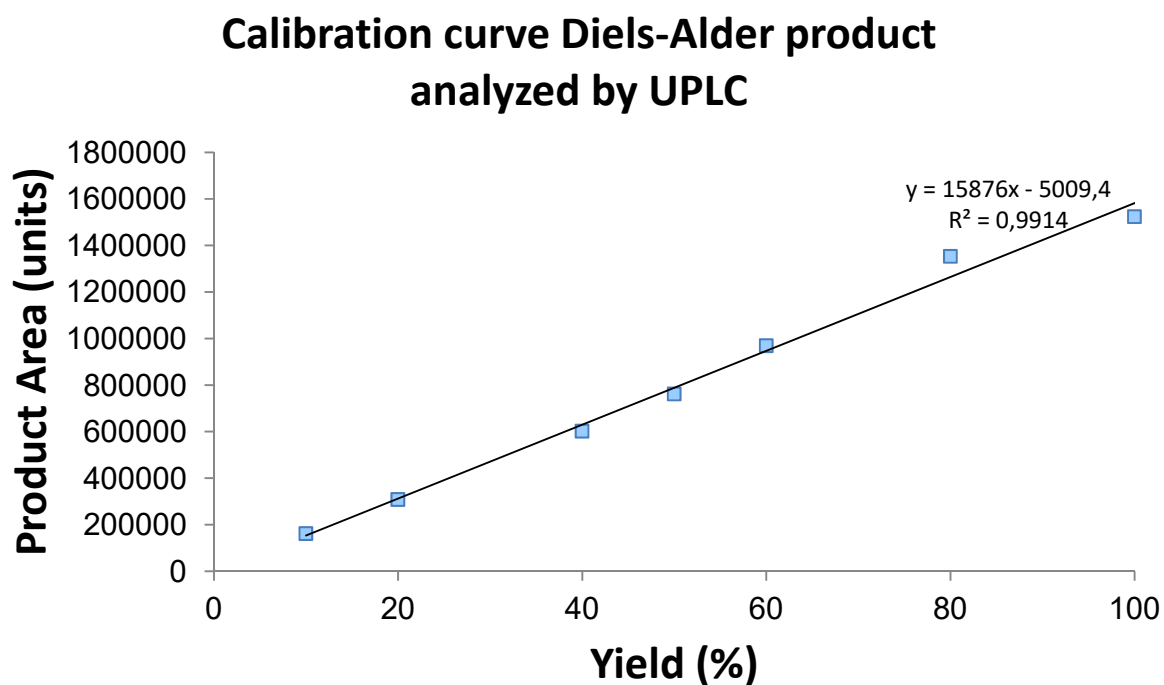

## HPLC Chromatograms

### Racemate of Diels-Alder product 6 (with internal standard)

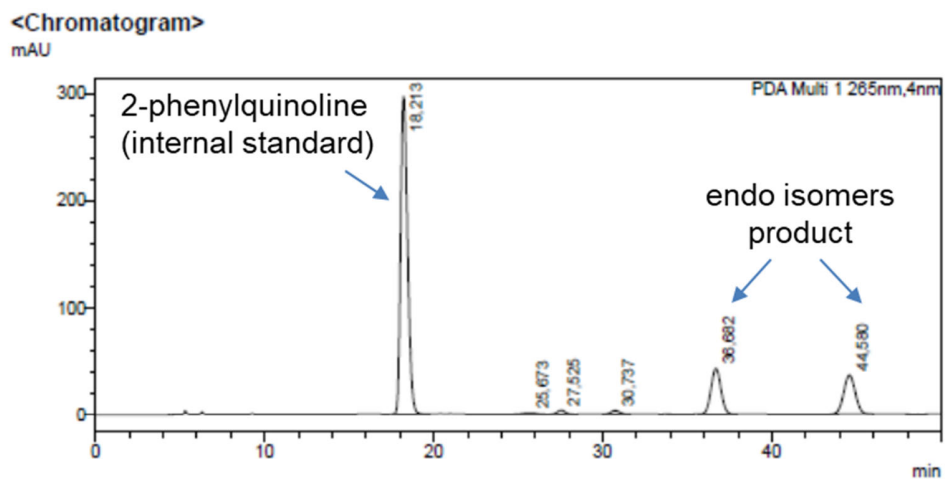

<Peak Table>

PDA Ch1 265nm

| Name | Area     | Ret. Time | Area%   | Height |
|------|----------|-----------|---------|--------|
|      | 8466571  | 18.213    | 68.777  | 296164 |
|      | 65921    | 25.673    | 0.536   | 1206   |
|      | 125137   | 27.525    | 1.017   | 3931   |
|      | 124138   | 30.737    | 1.008   | 3476   |
|      | 1762507  | 36.682    | 14.317  | 42972  |
|      | 1765923  | 44.580    | 14.345  | 36717  |
|      | 12310197 |           | 100.000 | 384466 |

18.8 min – 2-phenylquinoline (internal standard)

26.7 min – exo product enantiomer 1

29.7 min – exo product enantiomer 2

35.4 min – endo product enantiomer 1

42.5 min – endo product enantiomer 2

Unreacted azachalcone (**4**): 39.0 min (not present in this chromatogram).

**Cu-Phen catalyzed Diels-Alder reaction**

<Chromatogram>

mAU

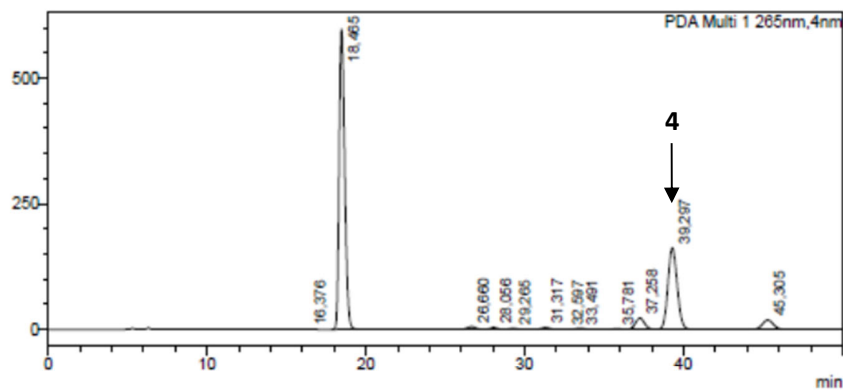

<Peak Table>

PDA Ch1 265nm

| Name | Area     | Ret. Time | Area%   | Height |
|------|----------|-----------|---------|--------|
|      | 4712     | 16.376    | 0.020   | 220    |
|      | 14489385 | 18.465    | 62.127  | 597231 |
|      | 182237   | 26.660    | 0.781   | 5204   |
|      | 104694   | 28.056    | 0.449   | 3515   |
|      | 65807    | 29.265    | 0.282   | 1883   |
|      | 118198   | 31.317    | 0.507   | 3400   |
|      | 11301    | 32.597    | 0.048   | 389    |
|      | 68119    | 33.491    | 0.284   | 1923   |
|      | 39803    | 35.781    | 0.171   | 1196   |
|      | 864138   | 37.258    | 3.705   | 22124  |
|      | 6518062  | 39.297    | 27.948  | 161935 |
|      | 857642   | 45.305    | 3.677   | 18356  |
|      | 23322096 |           | 100.000 | 817377 |



**Whole cell\_cytoplasmic SUMO\_Cu(II)-Phen added**

**<Chromatogram>**

mAU

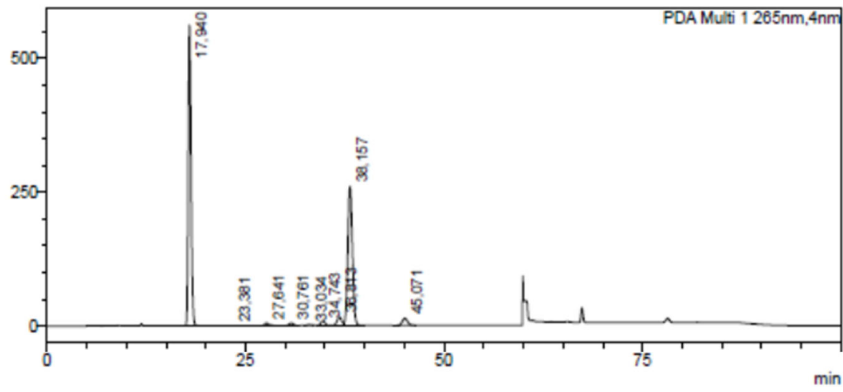

**<Peak Table>**

PDA Ch1 265nm

| Name | Area     | Ret. Time | Area%   | Height |
|------|----------|-----------|---------|--------|
|      | 13968867 | 17,940    | 52,988  | 561922 |
|      | 6953     | 23,381    | 0,026   | 315    |
|      | 184256   | 27,641    | 0,699   | 4928   |
|      | 168543   | 30,761    | 0,639   | 4686   |
|      | 29341    | 33,034    | 0,111   | 915    |
|      | 298013   | 34,743    | 1,130   | 8461   |
|      | 617221   | 36,813    | 2,341   | 15799  |
|      | 10462028 | 38,157    | 39,685  | 259773 |
|      | 627206   | 45,071    | 2,379   | 13115  |
|      | 26362429 |           | 100,000 | 869914 |

Whole cell\_cytoplasmic LmrR\_V15A\_A92E<Cu(II)-Phen

<Chromatogram>  
mAU

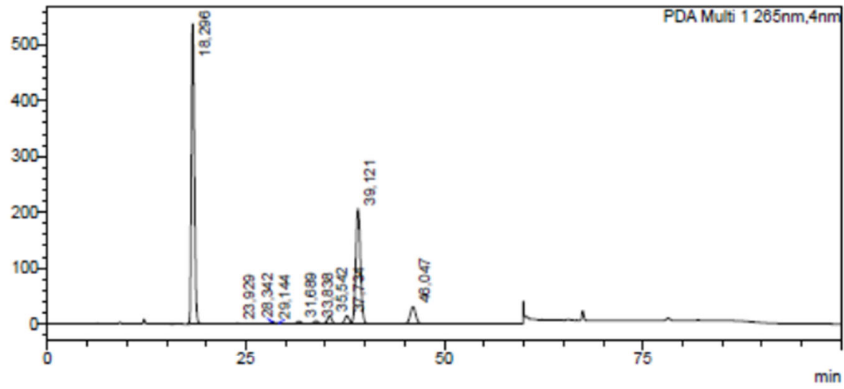

<Peak Table>

PDA Ch1 265nm

| Name | Area     | Ret. Time | Area%   | Height |
|------|----------|-----------|---------|--------|
|      | 13837809 | 18,296    | 54.760  | 537779 |
|      | 22471    | 23,929    | 0.089   | 914    |
|      | 113119   | 28,342    | 0.448   | 3702   |
|      | 44639    | 29,144    | 0.177   | 1360   |
|      | 158233   | 31,689    | 0.626   | 4274   |
|      | 175181   | 33,838    | 0.693   | 4976   |
|      | 530335   | 35,542    | 2.099   | 14117  |
|      | 546333   | 37,734    | 2.158   | 13905  |
|      | 8392822  | 39,121    | 33.213  | 205985 |
|      | 1450078  | 46,047    | 5.738   | 30429  |
|      | 25270020 |           | 100.000 | 817441 |

**Whole cell\_cytoplasmic LmrR\_V15A\_A92E no Cu(II)-Phen added**

**<Chromatogram>**

mAU

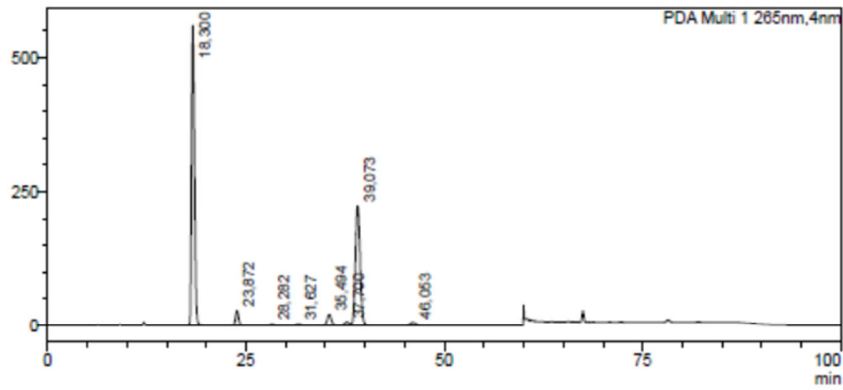

**<Peak Table>**

PDA Ch1 265nm

| Name | Area     | Ret. Time | Area%   | Height |
|------|----------|-----------|---------|--------|
|      | 14267297 | 18,300    | 55,826  | 560701 |
|      | 722057   | 23,872    | 2,825   | 28268  |
|      | 71842    | 28,282    | 0,280   | 2458   |
|      | 101882   | 31,627    | 0,399   | 2560   |
|      | 752624   | 35,494    | 2,945   | 20846  |
|      | 249876   | 37,700    | 0,978   | 6440   |
|      | 9135872  | 39,073    | 35,748  | 223302 |
|      | 255268   | 46,053    | 0,999   | 5389   |
|      | 25556517 |           | 100,000 | 849964 |

**Supernatant after Cu(II)-Phen incubation\_cytoplasmic LmrR\_V15A\_A92E**

**<Chromatogram>**

mAU

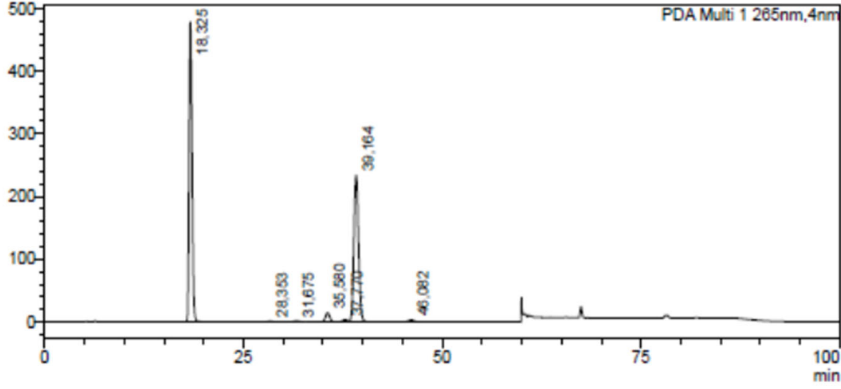

**<Peak Table>**

PDA Ch1 265nm

| Name | Area     | Ret. Time | Area%   | Height |
|------|----------|-----------|---------|--------|
|      | 12216067 | 18,325    | 54,103  | 478250 |
|      | 30833    | 28,353    | 0,137   | 1078   |
|      | 51994    | 31,675    | 0,230   | 1205   |
|      | 512154   | 35,580    | 2,268   | 14235  |
|      | 120783   | 37,770    | 0,535   | 3170   |
|      | 9522528  | 39,164    | 42,174  | 233337 |
|      | 124858   | 46,082    | 0,553   | 2671   |
|      | 22579215 |           | 100,000 | 733948 |

**Whole cell\_cytoplasmic LmrR\_V15A\_A92E<Cu(II)-Phen After 48 hours in vivo catalysis, Recycled cell fraction + substrates**

<Chromatogram>

mAU

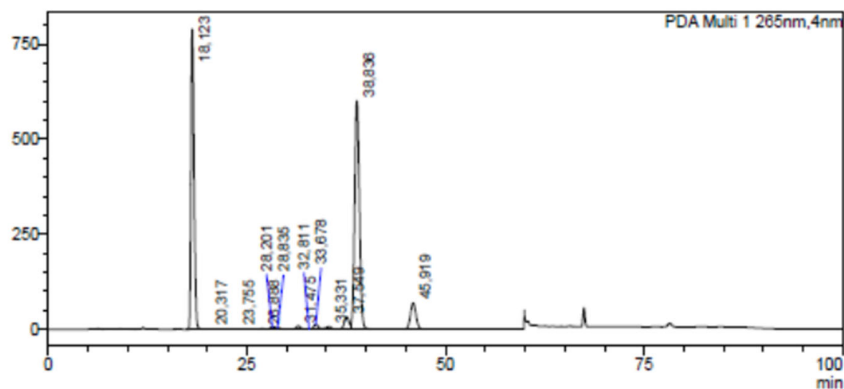

<Peak Table>

PDA Ch1 265nm

| Name | Area     | Ret. Time | Area%   | Height  |
|------|----------|-----------|---------|---------|
|      | 21109340 | 18,123    | 40,267  | 790018  |
|      | 10389    | 20,317    | 0,020   | 264     |
|      | 14787    | 23,755    | 0,028   | 606     |
|      | 47644    | 26,888    | 0,091   | 1143    |
|      | 209550   | 28,201    | 0,400   | 6624    |
|      | 145825   | 28,835    | 0,278   | 4287    |
|      | 292275   | 31,475    | 0,558   | 7938    |
|      | 10874    | 32,811    | 0,021   | 456     |
|      | 479647   | 33,678    | 0,915   | 12867   |
|      | 294081   | 35,331    | 0,561   | 6391    |
|      | 1275471  | 37,549    | 2,433   | 32362   |
|      | 25234731 | 38,836    | 48,136  | 600994  |
|      | 3299129  | 45,919    | 6,293   | 68308   |
|      | 62423743 |           | 100,000 | 1532258 |

**Whole cell\_cytoplasmic LmrR\_V15A\_A92E<Cu(II)-Phen After 48 hours in vivo catalysis, Supernatant + substrates**

<Chromatogram>

mAU

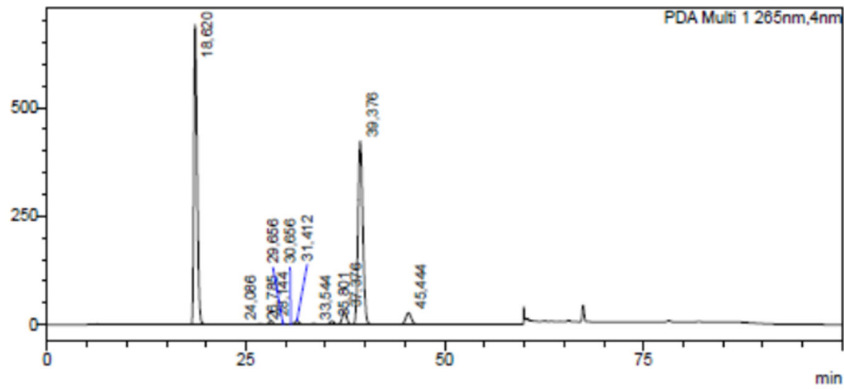

<Peak Table>

PDA Ch1 265nm

| Name | Area     | Ret. Time | Area%   | Height  |
|------|----------|-----------|---------|---------|
|      | 19823588 | 18,620    | 48,180  | 690828  |
|      | 5901     | 24,086    | 0,014   | 256     |
|      | 49314    | 26,785    | 0,121   | 1269    |
|      | 270582   | 28,144    | 0,664   | 8691    |
|      | 39440    | 29,656    | 0,097   | 1146    |
|      | 20484    | 30,656    | 0,050   | 807     |
|      | 287045   | 31,412    | 0,704   | 8030    |
|      | 58251    | 33,544    | 0,143   | 1738    |
|      | 275329   | 35,801    | 0,676   | 7689    |
|      | 1157212  | 37,376    | 2,840   | 28863   |
|      | 17688489 | 39,376    | 43,411  | 422746  |
|      | 1271373  | 45,444    | 3,120   | 26788   |
|      | 40747007 |           | 100,000 | 1198850 |

Whole cell\_cytoplasmic LmrR\_A92E<math>Cu(II)</math>-Phen

<Chromatogram>  
mAU

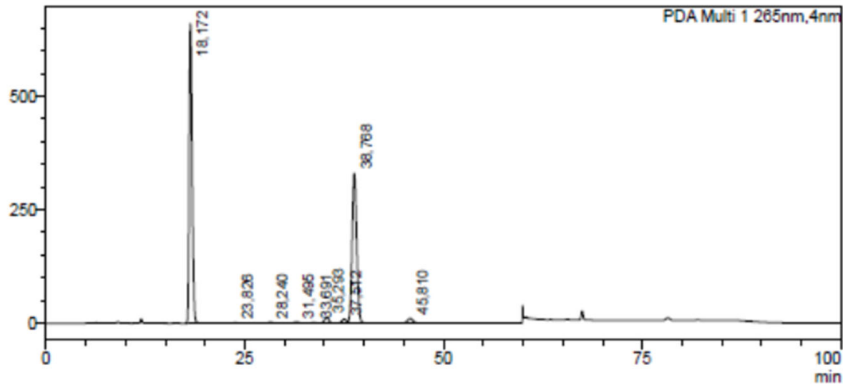

<Peak Table>

PDA Ch1 265nm

| Name | Area     | Ret. Time | Area%   | Height  |
|------|----------|-----------|---------|---------|
|      | 17034175 | 18,172    | 53,558  | 659731  |
|      | 26971    | 23,826    | 0,085   | 1076    |
|      | 44511    | 28,240    | 0,140   | 1714    |
|      | 92875    | 31,495    | 0,292   | 2493    |
|      | 41710    | 33,691    | 0,131   | 1299    |
|      | 482252   | 35,293    | 1,518   | 13502   |
|      | 323899   | 37,512    | 1,018   | 8645    |
|      | 13287172 | 38,768    | 41,777  | 329630  |
|      | 471509   | 45,810    | 1,482   | 9964    |
|      | 31805074 |           | 100,000 | 1028054 |

**Whole cell\_cytoplasmic LmrR\_V15A<math>Cu(II)</math>-Phen**

<Chromatogram>  
mAU

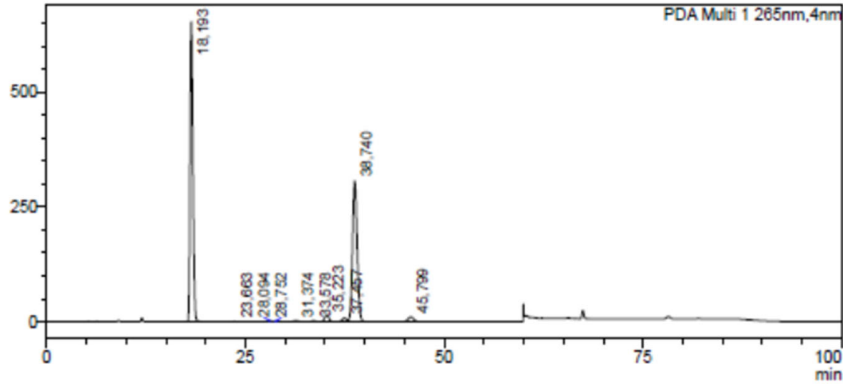

<Peak Table>

PDA Ch1 265nm

| Name | Area     | Ret. Time | Area%   | Height |
|------|----------|-----------|---------|--------|
|      | 16369770 | 18,193    | 53,707  | 653088 |
|      | 16816    | 23,663    | 0,055   | 688    |
|      | 57658    | 28,094    | 0,189   | 1839   |
|      | 24768    | 28,752    | 0,081   | 811    |
|      | 89404    | 31,374    | 0,293   | 2287   |
|      | 56707    | 33,578    | 0,186   | 1694   |
|      | 530692   | 35,223    | 1,741   | 14661  |
|      | 289294   | 37,457    | 0,949   | 7639   |
|      | 12550625 | 38,740    | 41,177  | 306711 |
|      | 493809   | 45,799    | 1,620   | 10386  |
|      | 30479543 |           | 100,000 | 999803 |



Whole cell\_cytoplasmic LmrR<Cu(II)-Phen

<Chromatogram>  
mAU

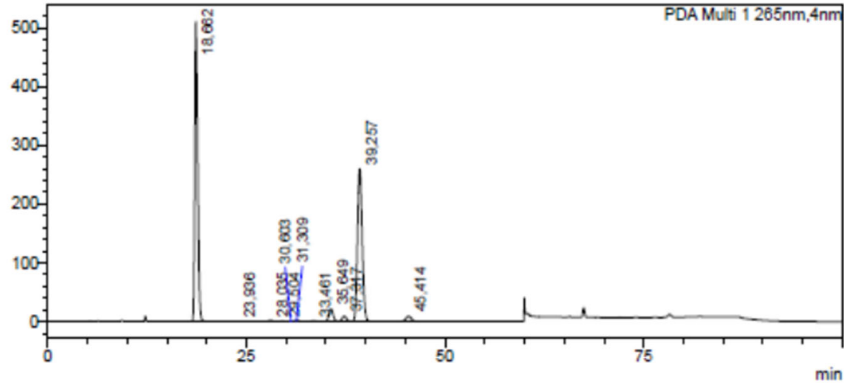

<Peak Table>

PDA Ch1 265nm

| Name | Area     | Ret. Time | Area%   | Height |
|------|----------|-----------|---------|--------|
|      | 13143791 | 18,662    | 51,530  | 509737 |
|      | 13264    | 23,936    | 0,052   | 558    |
|      | 59336    | 28,035    | 0,233   | 2011   |
|      | 17642    | 29,504    | 0,069   | 581    |
|      | 14698    | 30,603    | 0,058   | 499    |
|      | 88666    | 31,309    | 0,289   | 1970   |
|      | 34557    | 33,461    | 0,135   | 1057   |
|      | 767406   | 35,649    | 3,009   | 21381  |
|      | 344898   | 37,317    | 1,351   | 8751   |
|      | 10628330 | 39,257    | 41,668  | 259153 |
|      | 414614   | 45,414    | 1,625   | 8824   |
|      | 25507001 |           | 100,000 | 814524 |

**Purified protein LmrR\_V15A\_A92E<Cu-Phen**

**<Chromatogram>**

mAU

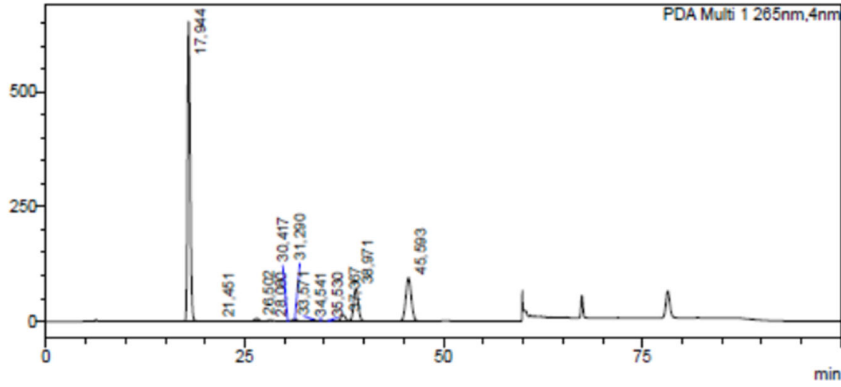

**<Peak Table>**

PDA Ch1 265nm

| Name | Area     | Ret. Time | Area%   | Height |
|------|----------|-----------|---------|--------|
|      | 15671535 | 17,944    | 64,313  | 652357 |
|      | 5861     | 21,451    | 0,024   | 300    |
|      | 224527   | 26,502    | 0,921   | 6131   |
|      | 46626    | 28,080    | 0,191   | 1739   |
|      | 26978    | 30,417    | 0,111   | 826    |
|      | 183914   | 31,290    | 0,755   | 5172   |
|      | 150492   | 33,571    | 0,618   | 4241   |
|      | 55733    | 34,541    | 0,229   | 1551   |
|      | 25015    | 35,530    | 0,103   | 728    |
|      | 553248   | 37,367    | 2,270   | 13948  |
|      | 2882962  | 38,971    | 11,831  | 71205  |
|      | 4540623  | 45,593    | 18,634  | 94668  |
|      | 24367513 |           | 100,000 | 852866 |

**Purified protein LmrR\_A92E-Cu-Phen**

**<Chromatogram>**

mAU

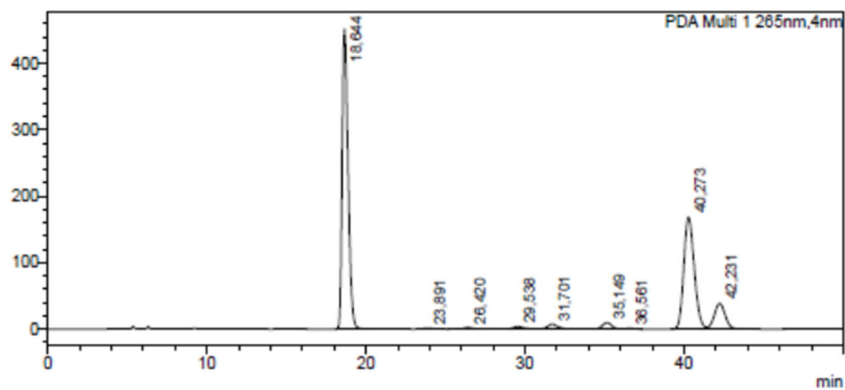

**<Peak Table>**

PDA Ch1 265nm

| Name | Area     | Ret. Time | Area%   | Height |
|------|----------|-----------|---------|--------|
|      | 11649144 | 18,644    | 52,840  | 451169 |
|      | 38930    | 23,891    | 0,177   | 738    |
|      | 61236    | 26,420    | 0,278   | 2013   |
|      | 129750   | 29,538    | 0,589   | 3226   |
|      | 282701   | 31,701    | 1,282   | 6832   |
|      | 371920   | 35,149    | 1,687   | 9459   |
|      | 31597    | 36,561    | 0,143   | 781    |
|      | 7683110  | 40,273    | 34,851  | 168113 |
|      | 1797498  | 42,231    | 8,153   | 38307  |
|      | 22045886 |           | 100,000 | 680637 |

**Purified protein LmrR\_V15A cCu-Phen**

**<Chromatogram>**

mAU

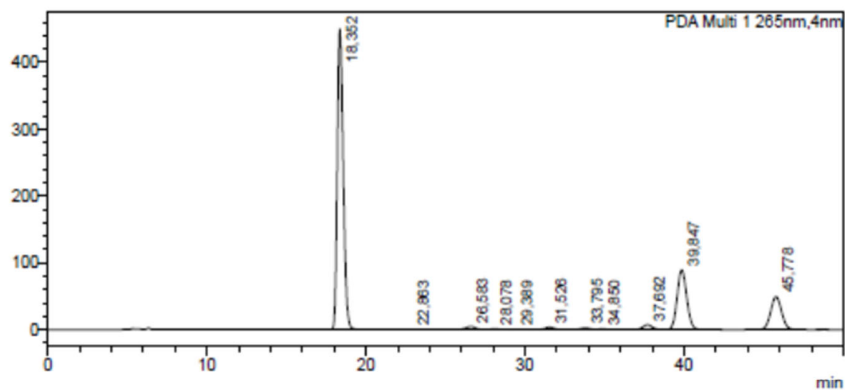

**<Peak Table>**

PDA Ch1 265nm

| Name | Area     | Ret. Time | Area%   | Height |
|------|----------|-----------|---------|--------|
|      | 11644277 | 18.352    | 63.188  | 449524 |
|      | 3245     | 22.863    | 0.018   | 157    |
|      | 176725   | 26.583    | 0.959   | 4476   |
|      | 32478    | 28.078    | 0.176   | 1090   |
|      | 12087    | 29.389    | 0.066   | 354    |
|      | 124666   | 31.526    | 0.677   | 3354   |
|      | 89272    | 33.795    | 0.484   | 2413   |
|      | 29067    | 34.850    | 0.158   | 796    |
|      | 278758   | 37.692    | 1.513   | 6928   |
|      | 3712268  | 39.847    | 20.145  | 88978  |
|      | 2325166  | 45.778    | 12.618  | 49154  |
|      | 18428008 |           | 100.000 | 607223 |

**Purified protein LmrR-Cu-Phen**

**<Chromatogram>**

mAU

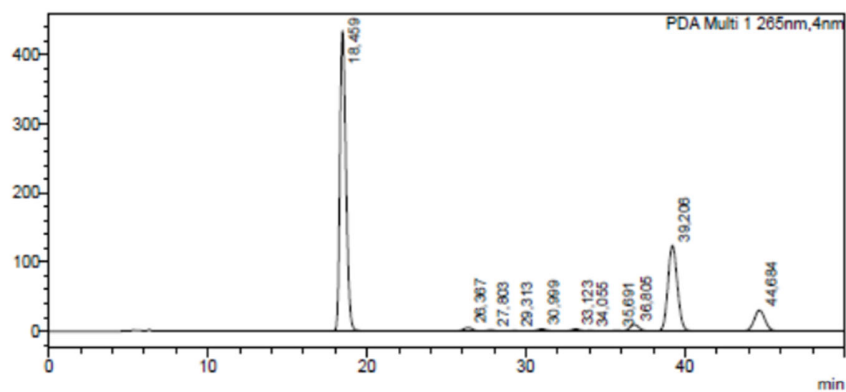

**<Peak Table>**

PDA Ch1 265nm

| Name | Area     | Ret. Time | Area%   | Height |
|------|----------|-----------|---------|--------|
|      | 11414999 | 18,459    | 60,848  | 434189 |
|      | 180840   | 26,367    | 0,964   | 4844   |
|      | 43959    | 27,803    | 0,234   | 1468   |
|      | 18476    | 29,313    | 0,098   | 565    |
|      | 102374   | 30,999    | 0,546   | 2815   |
|      | 94271    | 33,123    | 0,503   | 2693   |
|      | 19508    | 34,055    | 0,104   | 593    |
|      | 26900    | 35,691    | 0,143   | 822    |
|      | 367243   | 36,805    | 1,958   | 9280   |
|      | 5078492  | 39,208    | 27,071  | 123643 |
|      | 1412830  | 44,684    | 7,531   | 30080  |
|      | 18759891 |           | 100,000 | 610992 |

## 15. References

- (1) Roelfes, G.; Boersma, A.; Feringa, B. Highly enantioselective DNA-based catalysis. *Chem. Commun.* **2006**, 635-637.
- (2) Evans, D.; Fandrick, K.; Song, H. Enantioselective Friedel-Crafts alkylations of alpha-beta-unsaturated 2-acyl imidazoles catalyzed by bis(oxazoliny)pyridine-scandium(III) triflate complexes. *J. Am. Chem. Soc.* **2005**, 127, 8942-8943.
- (3) Bos, J.; Browne, W. R.; Driessen, A. J. M.; Roelfes, G. Supramolecular Assembly of Artificial Metalloenzymes Based on the Dimeric Protein LmrR as Promiscuous Scaffold. *J. Am. Chem. Soc.* **2015**, 137, 9796-9799.
- (4) Otto, S.; Bertoncin, F.; Engberts, J. Lewis acid catalysis of a Diels-Alder reaction in water. *J. Am. Chem. Soc.* **1996**, 118, 7702-7707.
- (5) Roelfes, G.; Feringa, B. DNA-based asymmetric catalysis. *Angew. Chem. Int. Ed.* **2005**, 44, 3230-3232.
- (6) Bos, J.; García-Herraiz, A.; Roelfes, G. An enantioselective artificial metallo-hydratase. *Chem. Sci.* **2013**, 4, 3578-3582.
- (7) Drienovská, I.; Rioz-Martinez, A.; Draksharapu, A.; Roelfes, G. Novel artificial metalloenzymes by in vivo incorporation of metal-binding unnatural amino acids. *Chem. Sci.* **2015**, 6, 770-776.
- (8) Renault, M.; Pawsey, S.; Bos, M. P.; Koers, E. J.; Nand, D.; Tommassen-van Boxtel, R.; Rosay, M.; Tommassen, J.; Maas, W. E.; Baldus, M. Solid-State NMR Spectroscopy on Cellular Preparations Enhanced by Dynamic Nuclear Polarization. *Angew. Chem. Int. Ed.* **2012**, 51, 2998-3001.
- (9) Lacabanne, D.; Meier, B. H.; Bockmann, A. Selective labeling and unlabeled strategies in protein solid-state NMR spectroscopy. *J. Biomol. NMR* **2018**, 71, 141-150.
- (10) Villarino, L.; Chordia, S.; Alonso-Cotchico, L.; Reddem, E. R.; Zhou, Z.; Thunnissen, A.-M.; Maréchal, J.-D.; Roelfes, G. Cofactor binding dynamics influence the catalytic activity and selectivity of an artificial metalloenzyme. *ACS Catal.* **2020**. DOI: 10.1021/acscatal.0c01619.

- (11) Sauvee, C.; Rosay, M.; Casano, G.; Aussenac, F.; Weber, R. T.; Ouari, O.; Tordo, P. Highly Efficient, Water-Soluble Polarizing Agents for Dynamic Nuclear Polarization at High Frequency. *Angew. Chem. Int. Ed.* **2013**, 52, 10858-10861.
- (12) Fung, B.; Khitritin, A.; Ermolaev, K. An improved broadband decoupling sequence for liquid crystals and solids. *J. Magn. Res.* **2000**, 142, 97-101.
- (13) Weingarth, M.; Demco, D. E.; Bodenhausen, G.; Tekely, P. Improved magnetization transfer in solid-state NMR with fast magic angle spinning. *Chem. Phys. Lett.* **2009**, 469, 342-348.
- (14) Baldus, M.; Petkova, A.; Herzfeld, J.; Griffin, R. Cross polarization in the tilted frame: assignment and spectral simplification in heteronuclear spin systems. *Mol. Phys.* **1998**, 95, 1197-1207.
- (15) Hohwy, M.; Rienstra, C.; Jaroniec, C.; Griffin, R. Fivefold symmetric homonuclear dipolar recoupling in rotating solids: Application to double quantum spectroscopy. *J. Chem. Phys.* **1999**, 110, 7983-7992.
- (16) Takeuchi, K.; Imai, M.; Shimada, I. Dynamic equilibrium on DNA defines transcriptional regulation of a multidrug binding transcriptional repressor, LmrR. *Sci. Rep.* **2017**, 7, 267.
- (17) Takeuchi, K.; Tokunaga, Y.; Imai, M.; Takahashi, H.; Shimada, I. Dynamic multidrug recognition by multidrug transcriptional repressor LmrR. *Sci. Rep.* **2014**, 4, 6922.
- (18) Delaglio, F.; Grzesiek, S.; Vuister, G.; Zhu, G.; Pfeifer, J.; Bax, A. NMRpipe - a Multidimensional Spectral Processing System Based on Unix Pipes. *J. Biomol. NMR* **1995**, 6, 277-293.
- (19) Lee, W.; Tonelli, M.; Markley, J. L. NMRFAM-SPARKY: enhanced software for biomolecular NMR spectroscopy. *Bioinformatics* **2015**, 31, 1325-1327.
- (20) Narasimhan S., Mance D., Pinto C., Weingarth M., Bonvin A.M.J.J., Baldus M. (2018) Rapid Prediction of Multi-dimensional NMR Data Sets Using FANDAS. In: Ghose R. (eds) Protein NMR. Methods in Molecular Biology, vol 1688. Humana Press, New York, NY.
- (21) Reetz, M. T.; Kahakeaw, D.; Lohmer, R. Addressing the numbers problem in directed evolution. *ChemBioChem* **2008**, 9, 1797-1804.

(22) Sullivan, B.; Walton, A. Z.; Stewart, J. D. Library construction and evaluation for site saturation mutagenesis. *Enzyme Microb. Technol.* **2013**, 53, 70-77.

(23) Arnold F.H., Georgiou G. (2003) Directed enzyme evolution: screening and selection methods, vol 230. Humana Press, Totowa. DOI: 10.1385/1592593968
